# Supplementary material for: Stereoselective synthesis of strained cage compounds via gold-catalyzed allene functionalization
Source: Royal Society of Chemistry journal article supplement (doi:10.1039/c6cc03779h), 2016-01-01

## Supporting Information for the Paper

# Stereoselective Synthesis of Strained Cage Compounds *via* Gold-Catalyzed Allene Functionalization

Benito Alcaide,<sup>\*1</sup> Pedro Almendros,<sup>\*2</sup> Sara Cembellín,<sup>1</sup> Israel Fernández,<sup>3</sup> and Teresa Martínez del  
Campo<sup>1</sup>

<sup>1</sup>*Grupo de Lactamas y Heterociclos Bioactivos, Departamento de Química Orgánica I, Unidad  
Asociada al CSIC, Facultad de Química, Universidad Complutense de Madrid, 28040-Madrid,  
Spain*

<sup>2</sup>*Instituto de Química Orgánica General, IQOG-CSIC, Consejo Superior de Investigaciones  
Científicas, Juan de la Cierva 3, 28006-Madrid, Spain*

<sup>3</sup>*Departamento de Química Orgánica I, Facultad de Química, Universidad Complutense de  
Madrid, 28040-Madrid, Spain*

E-mail: [alcaideb@quim.ucm.es](mailto:alcaideb@quim.ucm.es); [Palmendros@iqog.csic.es](mailto:Palmendros@iqog.csic.es)

## Table of Contents

|                                                           |       |
|-----------------------------------------------------------|-------|
| Experimental Procedures                                   | 2–21  |
| Computational Details and Cartesian Coordinates           | 22–29 |
| <sup>1</sup> H NMR, NOESY and <sup>13</sup> C NMR Spectra | 30–65 |

**General Methods:**  $^1\text{H}$  NMR and  $^{13}\text{C}$  NMR spectra were recorded on a Bruker Avance AVIII-700 with cryoprobe or Varian VRX-300S. NMR spectra were recorded in  $\text{CDCl}_3$  solutions, except otherwise stated. Chemical shifts are given in ppm relative to TMS ( $^1\text{H}$ , 0.0 ppm), or  $\text{CDCl}_3$  ( $^{13}\text{C}$ , 76.9 ppm). Low and high resolution mass spectra were taken on an AGILENT 6520 Accurate-Mass QTOF LC/MS spectrometer using the electrospray mode (ES) unless otherwise stated. IR spectra were recorded on a Bruker Tensor 27 spectrometer. All commercially available compounds were used without further purification.

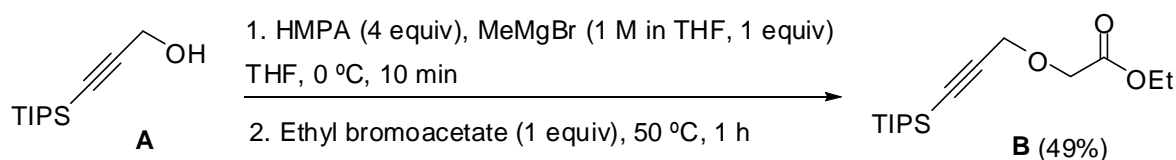

compound **A** was prepared in a three-step sequence from propargyl alcohol as reported in Le. C. M.; Menzies, P. J. C.; Petrone, D. A.; Lautens, M. *Angew. Chem. Int. Ed.* **2015**, *54*, 254

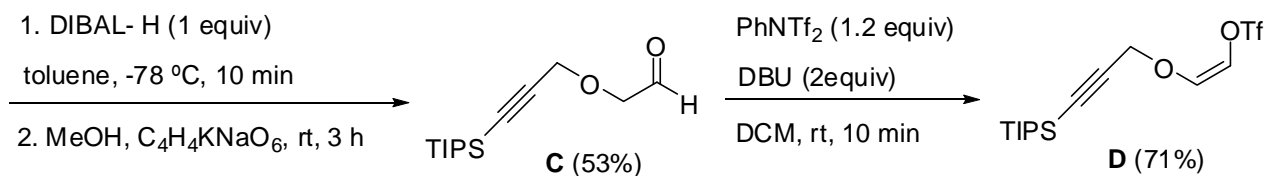

compound **D** was prepared according to a literature procedure: F.; Nakano, T.; Soeta, T.; Endo, K.; Ukaji, T. *J. Org. Chem.* **2015**, *80*, 5696

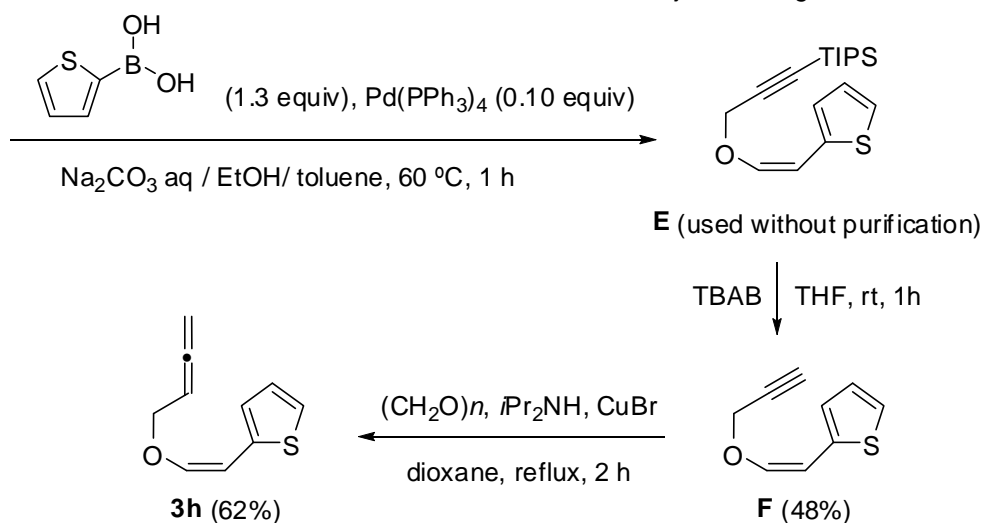

**Scheme S1** Synthesis of (vinylxy)buta-1,2-diene **3h**.

**Preparation of (Z)-2-[2-(prop-2-ynoxy)vinyl]thiophene F.** To a solution of triflate **D** (354, 0.92 mmol) in toluene (15 mL) and EtOH (2.5 mL) was added 2 M aq solution of Na<sub>2</sub>CO<sub>3</sub> (15 mL). After Pd(PPh<sub>3</sub>)<sub>4</sub> (106 mg, 0.09 mmol, 10 mol %) and 2-thienylboronic acid (198 mg, 1.55 mmol) were added, the reaction mixture was stirred at 60 °C for 1 h under argon atmosphere. The reaction mixture was cooled to room temperature and insoluble substance was filtered off through a pad of Celite. The aqueous layer of the filtrate was separated and extracted with Et<sub>2</sub>O. The combined organic extracts were washed with water and brine, dried over Na<sub>2</sub>SO<sub>4</sub>, and solvent was evaporated. The crude product, which contained (Z)-triisopropyl(3-(2-(thiophen-2-yl)vinyloxy)prop-1-ynyl)silane **E**, was used for next reaction without further purification.

Tetra-*n*-butylammonium fluoride (1.0 equiv, THF solution 1M) was added to the crude residue containing 318 mg (0.99 mmol) of (Z)-triisopropyl(3-(2-(thiophen-2-yl)vinyloxy)prop-1-ynyl)silane **E** solved in THF (4 mL). After being stirred for 1 h at room temperature, the solution was diluted with ether. The organic layer was separated, washed with water, dried (Na<sub>2</sub>SO<sub>4</sub>), and concentrated under reduced pressure. Flash chromatography of the residue using hexanes/ethyl acetate (2:1) as eluent gave compound **F** (78 mg, 48%) as a colorless oil; <sup>1</sup>H NMR (300 MHz, CDCl<sub>3</sub>, 25 °C): δ = 7.19 (d, 1H, *J* = 5.1 Hz, Ar), 7.04 (d, 1H, *J* = 3.5 Hz, Ar), 6.97 (dd, 1H, *J* = 5.1, 3.7 Hz, Ar), 6.32 (d, 1H, *J* = 6.4 Hz, =CH), 5.78 (d, 1H, *J* = 6.4 Hz, =CH), 4.60 (d, 2H, *J* = 2.5 Hz, OCH<sub>2</sub>), 2.55 (t, 1H, *J* = 2.5 Hz, ≡CH); <sup>13</sup>C NMR (75 MHz, CDCl<sub>3</sub>, 25 °C): δ = 142.3 (=CH), 137.6, 126.3 (Ar, CH), 125.3 (Ar, CH), 124.5 (Ar, CH), 102.4 (=CH), 78.3, 75.8 (≡CH), 59.6 (OCH<sub>2</sub>); IR (CHCl<sub>3</sub>): ν = 2940, 1650, 1359, 695, 666 cm<sup>-1</sup>; HRMS (ES): calcd for C<sub>9</sub>H<sub>9</sub>OS[M]<sup>+</sup>: 165.0374; found: 165.0372.

The reactions of two new (vinyloxy)buta-1,2-dienes **3** (**3g** and **3j**) were attempted. Unfortunately, the coupling step between enol triflate **D** and (5-methylfuran-2-yl)boronic acid or benzofuran-2-ylboronic acid were unproductive. The reaction of **D** with (5-methylfuran-2-yl)boronic acid was a

complete mess under different reaction conditions. Also, the coupling of **D** with benzofuran-2-ylboronic acid was not very competent. After column chromatography we can isolate two fractions: The more polar compound was a clean product with a structure different to the desired (Z)-3-((2-(benzofuran-2-yl)vinyl)oxy)prop-1-yn-1-yl)triisopropylsilane, while the more polar fraction was a mixture of various products (for their recorded spectra, please see figures below). Consequently, it may be inferred that the synthesis of enol ether derivatives **3** is not trivial and our  $\beta$ -lactam based protocol is a more promising alternative.

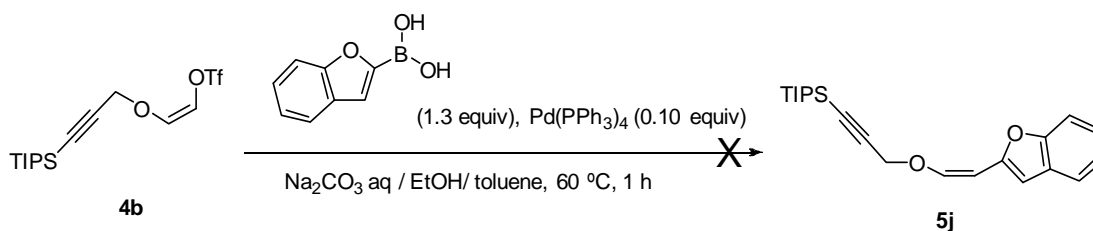

Q09SC1783A

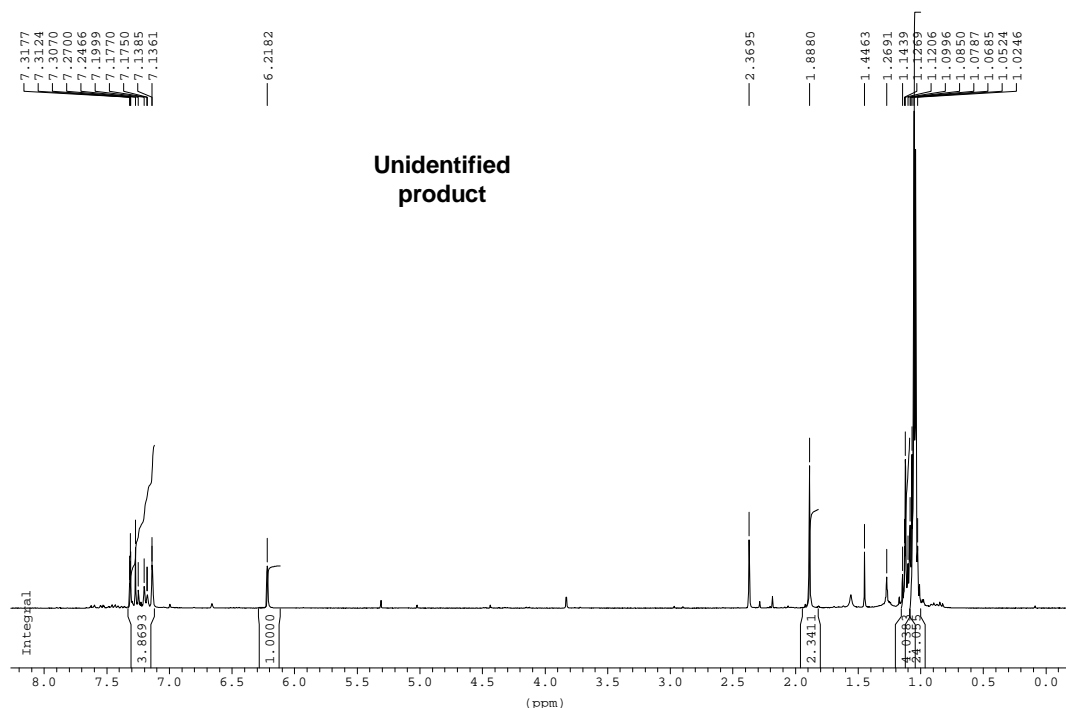

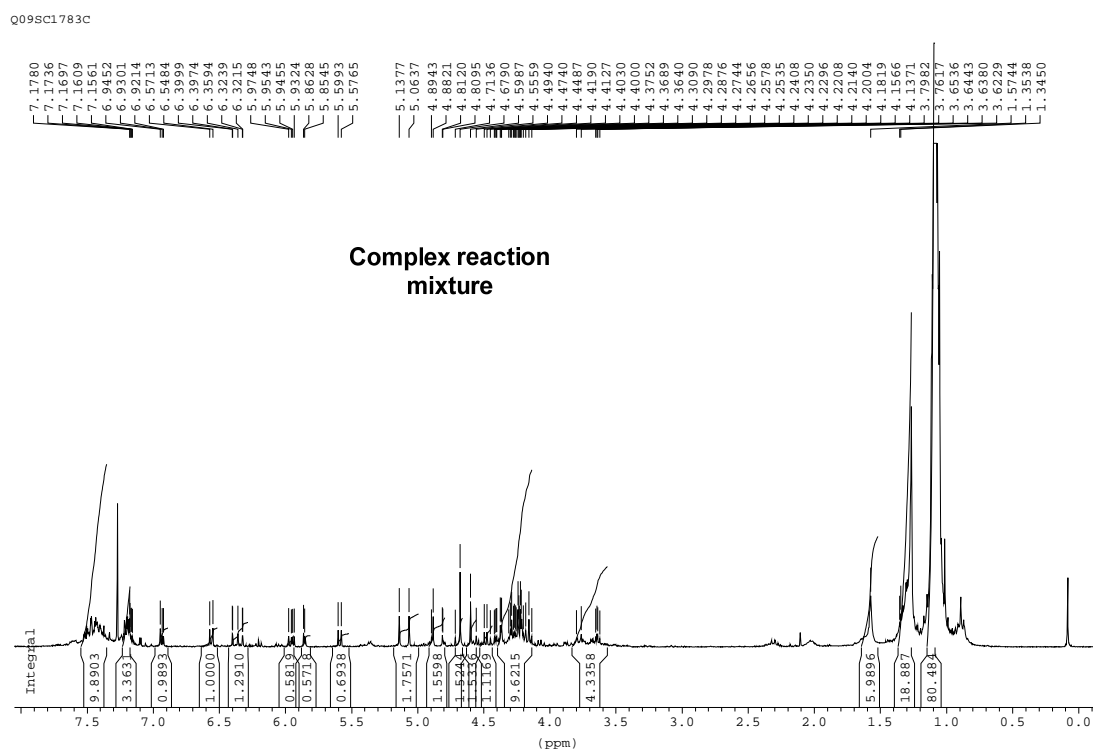

**Cu-Catalyzed Reaction of  $\beta$ -Lactam-Tethered Alkynes and (Z)-2-[2-(Prop-2-ynyloxy)vinyl]thiophene F. General Procedure for the Preparation of  $\beta$ -Lactam-Tethered Allenes 1a–p and (Vinyloxy)buta-1,2-diene 3h.** A well stirred solution of  $(\text{CH}_2\text{O})_n$  (0.5 mmol), CuI (0.1 mmol), the appropriate alkyne (0.2 mmol), and *N,N*-diisopropylethylamine (Hünig's base) (0.36 mmol) in dioxane (1 mL) was refluxed under argon atmosphere. When the reaction was complete as monitored by TLC, it was cooled to RT. Water (5 mL) was added before being extracted with ethyl acetate (3 x 15 mL). The organic phase was washed with water (2 x 5 mL), dried ( $\text{MgSO}_4$ ) and concentrated under reduced pressure. Chromatography of the residue eluting with hexanes/ethyl acetate mixtures gave analytically pure compounds **1**. Spectroscopic and analytical data for allenes **1** follow.

**$\beta$ -Lactam-Tethered Allene 1a.** From 91 mg (0.25 mmol) of the corresponding  $\beta$ -lactam-tethered alkyne, and after flash chromatography of the residue using hexanes/ethyl acetate (2:1) as eluent gave compound **1a** (58 mg, 61%) as a colorless oil;  $^1\text{H NMR}$  (300 MHz,  $\text{CDCl}_3$ , 25 °C):  $\delta$  = 7.82 (d,

1H,  $J = 8.0$  Hz, ArH), 7.46 (d, 2H,  $J = 8.9$  Hz, ArH), 7.45 (m, 1H, ArH), 7.38 (t, 1H,  $J = 7.4$  Hz, ArH), 7.29 (m, 1H, ArH), 7.27 (s, 1H, ArH), 6.86 (d, 2H,  $J = 8.9$  Hz, ArH), 5.62 (d, 1H,  $J = 4.7$  Hz, H3), 5.20 (d, 1H,  $J = 4.5$  Hz, H4), 5.04 (m, 1H,  $J = 7.0$  Hz, =CH), 4.79 (m, 2H, =CH<sub>2</sub>), 4.01 (m, 2H, OCH<sub>2</sub>), 3.87 (s, 3H, NMe), 3.82 (s, 3H, OMe); <sup>13</sup>C NMR (75 MHz, CDCl<sub>3</sub>, 25 °C):  $\delta = 209.6$ , 164.1 (CO), 156.1, 137.0, 130.8, 129.1 (Ar, CH), 127.3, 121.8 (Ar, CH), 119.6 (Ar, CH), 118.9 (Ar, CH), 118.7 (Ar, 2CH), 114.1 (Ar, 2CH), 109.5 (Ar, CH), 106.4, 86.7 (=CH), 82.1 (CH, H3), 75.5 (=CH<sub>2</sub>), 68.5 (OCH<sub>2</sub>), 55.4 (CH, H4), 55.3 (OMe), 33.0 (NMe); IR (CHCl<sub>3</sub>):  $\nu = 2922$ , 1744 (CO), 1512, 1246, 832, 745 cm<sup>-1</sup>; HRMS (ES): calcd for C<sub>23</sub>H<sub>23</sub>N<sub>2</sub>O<sub>3</sub>[M+H]<sup>+</sup>: 375.1709; found: 375.1712.

**$\beta$ -Lactam-Tethered Allene 1b.** From 370 mg (0.84 mmol) of the corresponding  $\beta$ -lactam-tethered alkyne, and after flash chromatography of the residue using hexanes/ethyl acetate (3:1) as eluent gave compound **1b** (273 mg, 71%) as a colorless oil; <sup>1</sup>H NMR (300 MHz, CDCl<sub>3</sub>, 25 °C):  $\delta = 7.72$  (d, 1H,  $J = 1.5$  Hz, ArH), 7.57 (d, 2H,  $J = 9.1$  Hz, ArH), 7.30 (dd, 1H,  $J = 8.8$ , 1.7 Hz, ArH), 7.17 (t, 1H,  $J = 8.8$  Hz, ArH), 6.96 (s, 1H, ArH), 6.87 (d, 2H,  $J = 9.1$  Hz, ArH), 5.44 (m, 1H, =CH), 5.40 (d, 1H,  $J = 5.4$  Hz, H3), 5.06 (d, 1H,  $J = 5.0$  Hz, H4), 4.93 (m, 2H, =CH<sub>2</sub>), 4.14 (m, 2H, OCH<sub>2</sub>), 3.79 (s, 3H, NMe), 3.74 (s, 3H, OMe); <sup>13</sup>C NMR (75 MHz, CDCl<sub>3</sub>, 25 °C):  $\delta = 195.1$ , 164.3 (CO), 157.0, 142.3, 137.4, 130.6 (Ar, CH), 125.0 (Ar, CH), 121.9 (Ar, CH), 121.4, 121.1 (Ar, 2CH), 119.9, 114.2 (Ar, 2CH), 111.0 (Ar, CH), 106.8, 86.7 (=CH), 82.1 (CH, H3), 75.7 (=CH<sub>2</sub>), 68.9 (OCH<sub>2</sub>), 55.4 (CH, H4), 54.9 (OMe), 33.1 (NMe); IR (CHCl<sub>3</sub>):  $\nu = 2922$ , 1744 (CO), 1512, 1246, 1082, 797, 752 cm<sup>-1</sup>; HRMS (ES): calcd for C<sub>23</sub>H<sub>22</sub>BrN<sub>2</sub>O<sub>3</sub>[M+H]<sup>+</sup>: 453.0814; found: 453.0813.

**$\beta$ -Lactam-Tethered Allene 1c.** From 275 mg (0.63 mmol) of the corresponding  $\beta$ -lactam-tethered alkyne, and after flash chromatography of the residue using hexanes/ethyl acetate (2:1) as eluent gave compound **1c** (161 mg, 61%) as a colorless oil; <sup>1</sup>H NMR (300 MHz, CDCl<sub>3</sub>, 25 °C):  $\delta = 8.06$  (d, 1H,  $J = 7.9$  Hz, ArH), 7.64 (d, 1H,  $J = 8.0$  Hz, ArH), 7.41 (d, 2H,  $J = 8.9$  Hz, ArH), 7.32 (t, 1H,  $J = 8.0$  Hz, ArH), 7.13 (s, 1H, ArH), 6.85 (d, 2H,  $J = 8.9$  Hz, ArH), 5.99 (d, 1H,  $J = 4.8$  Hz, H3),

5.08 (d, 1H,  $J = 4.9$  Hz, H4), 4.98 (m, 1H,  $J = 6.9$  Hz, =CH), 4.63 (m, 2H, =CH<sub>2</sub>), 4.01 (m, 2H, OCH<sub>2</sub>), 3.79 (s, 3H, NMe), 3.78 (s, 3H, OMe); <sup>13</sup>C NMR (75 MHz, CDCl<sub>3</sub>, 25 °C):  $\delta = 209.4$ , 164.8 (CO), 156.2, 142.1, 139.8, 133.1 (Ar, CH), 130.8, 120.6 (Ar, CH), 119.4, 118.8 (Ar, 2CH), 118.3 (Ar, CH), 116.3 (Ar, CH), 114.4 (Ar, 2CH), 107.7, 87.0 (=CH), 83.5 (CH, H3), 75.6 (=CH<sub>2</sub>), 69.1 (OCH<sub>2</sub>), 57.2 (CH, H4), 55.5 (OMe), 33.5 (NMe); IR (CHCl<sub>3</sub>):  $\nu = 2924$ , 1738 (CO), 1513, 1252, 1031, 800, 741 cm<sup>-1</sup>; HRMS (ES): calcd for C<sub>23</sub>H<sub>21</sub>N<sub>3</sub>O<sub>5</sub> [ $M + H$ ]<sup>+</sup>: 420.1559; found: 420.1572.

**$\beta$ -Lactam-Tethered Allene 1d.** From 110 mg (0.28 mmol) of the corresponding  $\beta$ -lactam-tethered alkyne, and after flash chromatography of the residue using hexanes/ethyl acetate (2:1) as eluent gave compound **1d** (62 mg, 55%, mixture of isomers = 75:25) as a colorless oil; <sup>1</sup>H NMR (300 MHz, C<sub>6</sub>D<sub>6</sub>, 25 °C):  $\delta = 7.62$  (d, 0.5H,  $J = 9.0$  Hz, ArH), 7.60 (d, 1.5H,  $J = 9.0$  Hz, ArH), 7.27 (d, 0.25H,  $J = 2.3$  Hz, ArH), 7.23 (d, 0.75H,  $J = 2.3$  Hz, ArH), 7.04 (dd, 1H,  $J = 8.9$ , 2.4 Hz, ArH), 6.81 (d, 0.25H,  $J = 8.9$  Hz, ArH), 6.86 (d, 0.75H,  $J = 8.9$  Hz, ArH), 6.67 (s, 0.25H, ArH), 6.59 (d, 0.5H,  $J = 9.0$  Hz, ArH), 6.56 (d, 1.5H,  $J = 9.0$  Hz, ArH), 6.30 (s, 0.75H, ArH), 5.25 (m, 1H,  $J = 6.8$  Hz, =CH), 5.08 (d, 0.75H,  $J = 1.7$  Hz, H3), 4.95 (d, 0.25H,  $J = 4.7$  Hz, H3), 4.87 (d, 0.75H,  $J = 1.7$  Hz, H4), 4.69 (d, 0.25H,  $J = 4.7$  Hz, H4), 4.51 (m, 0.5H, =CH<sub>2</sub>), 4.40 (m, 1.5H, =CH<sub>2</sub>), 4.20 (m, 2H, OCH<sub>2</sub>), 3.64 (s, 0.75H, OMe), 3.52 (s, 2.25H, OMe), 3.16 (s, 0.75H, OMe), 3.14 (s, 2.25H, OMe), 2.79 (s, 0.75H, NMe), 2.75 (s, 2.25H, NMe); <sup>13</sup>C NMR (75 MHz, C<sub>6</sub>D<sub>6</sub>, 25 °C):  $\delta = 209.8$ , 164.1 (CO), 156.6, 155.3, 132.9, 132.1, 128.5 (Ar, CH), 127.7 (Ar, CH), 119.0 (Ar, 2CH), 114.6 (Ar, 2CH), 113.3 (Ar, CH), 110.9 (Ar, CH), 110.1, 100.6, 90.0 (=CH), 88.0 (CH, H3), 75.8 (=CH<sub>2</sub>), 68.9 (OCH<sub>2</sub>), 58.1 (CH, H4), 55.4 (OMe), 54.9 (OMe), 32.1 (NMe); IR (CHCl<sub>3</sub>):  $\nu = 2937$ , 1740 (CO), 1515, 1278, 1036, 812, 738 cm<sup>-1</sup>; HRMS (ES): calcd for C<sub>24</sub>H<sub>24</sub>NaN<sub>2</sub>O<sub>4</sub> [ $M + Na$ ]<sup>+</sup>: 427.1634; found: 427.1620.

**$\beta$ -Lactam-Tethered Allene 1e.** From 110 mg (0.29 mmol) of the corresponding  $\beta$ -lactam-tethered alkyne, and after flash chromatography of the residue using hexanes/ethyl acetate (2:1) as eluent gave compound **1e** (59 mg, 54%, mixture of isomers = 60:40) as a colorless oil;  $^1\text{H}$  NMR (300 MHz,  $\text{C}_6\text{D}_6$ , 25  $^\circ\text{C}$ ):  $\delta$  = 7.62 (d, 1.2H,  $J$  = 9.0 Hz, ArH), 7.58 (d, 0.8H,  $J$  = 8.6, 3.5 Hz, ArH), 7.13 (t, 0.6H,  $J$  = 7.8 Hz, ArH), 6.99 (t, 0.4H,  $J$  = 7.6 Hz, ArH), 6.88 (d, 1.2H,  $J$  = 7.1 Hz, ArH), 6.83 (d, 0.8H,  $J$  = 7.0 Hz, ArH), 6.60 (d, 1.2H,  $J$  = 8.9 Hz, ArH), 6.59 (d, 0.8H,  $J$  = 8.9 Hz, ArH), 6.55 (s, 0.6H, ArH), 6.24 (s, 0.4H, ArH), 5.25 (m, 0.4H,  $J$  = 6.8 Hz, =CH), 5.09 (d, 0.4H,  $J$  = 1.6 Hz, H3), 5.02 (d, 0.6H,  $J$  = 4.7 Hz, H3), 4.92 (m, 0.6H,  $J$  = 6.9 Hz, =CH), 4.84 (d, 0.4H,  $J$  = 1.8 Hz, H4), 4.67 (d, 0.4H,  $J$  = 4.7 Hz, H4), 4.44 (m, 1.2H, =CH<sub>2</sub>), 4.20 (m, 2H, OCH<sub>2</sub>), 3.79 (m, 0.6H, =CH<sub>2</sub>), 3.16 (s, 1.8H, OMe), 3.13 (s, 1.2H, OMe), 3.02 (s, 1.8H, NMe), 2.97 (s, 1.2H, OMe), 2.27 (s, 3H, Me);  $^{13}\text{C}$  NMR (75 MHz,  $\text{C}_6\text{D}_6$ , 25  $^\circ\text{C}$ ):  $\delta$  = 209.6, 164.2 (CO), 156.5, 131.9, 130.7, 128.3 (Ar, CH), 128.3, 124.8 (Ar, CH), 121.8, 120.3, 119.0 (Ar, 2CH), 116.9 (Ar, CH), 114.6 (Ar, 2CH), 106.7 (Ar, CH), 87.6 (=CH), 83.0 (CH, H3), 75.5 (=CH<sub>2</sub>), 68.7 (OCH<sub>2</sub>), 57.9 (CH, H4), 55.0 (OMe), 36.7 (NMe), 19.5 (Me); IR ( $\text{CHCl}_3$ ):  $\nu$  = 2939, 1742 (CO), 1507, 1260, 1042, 801, 742  $\text{cm}^{-1}$ ; HRMS (ES): calcd for  $\text{C}_{24}\text{H}_{24}\text{NaN}_2\text{O}_3[M + \text{Na}]^+$ : 411.1685; found: 411.1664.

**$\beta$ -Lactam-Tethered Allene 1f.** From 130 mg (0.32 mmol) of the corresponding  $\beta$ -lactam-tethered alkyne, and after flash chromatography of the residue using hexanes/ethyl acetate (3:1) as eluent gave compound **1f** (62 mg, 55%, mixture of isomers = 55:45) as a colorless oil;  $^1\text{H}$  NMR (300 MHz,  $\text{C}_6\text{D}_6$ , 25  $^\circ\text{C}$ ):  $\delta$  = 7.84 (dd, 0.45H,  $J$  = 8.2 Hz, ArH), 7.77 (dd, 0.55H,  $J$  = 8.6 Hz, ArH), 7.74 (d, 1.1H,  $J$  = 8.2 Hz, ArH), 7.71 (d, 0.9H,  $J$  = 8.9 Hz, ArH), 7.25 (dd, 0.45H,  $J$  = 8.2, 1.3 Hz, ArH), 7.09 (dd, 0.55H,  $J$  = 8.3, 1.3 Hz, ArH), 7.06 (s, 0.45H, ArH), 7.04 (s, 0.55H, ArH), 6.81 (s, 0.45H, ArH), 6.68 d, 1.1H,  $J$  = 9.3 Hz, ArH), 6.65 (d, 0.9H,  $J$  = 9.2 Hz, ArH), 6.46 (s, 0.55H, ArH), 5.38 (m, 0.45H,  $J$  = 6.9 Hz, =CH), 5.21 (d, 0.55H,  $J$  = 1.7 Hz, H3), 5.15 (d, 0.45H,  $J$  = 4.8 Hz, H3), 5.02 (m, 0.55H,  $J$  = 6.8 Hz, =CH), 4.98 (d, 0.55H,  $J$  = 1.7 Hz, H4), 4.82 (d, 0.45H,  $J$  = 4.7 Hz, H4), 4.56 (m, 2H, =CH<sub>2</sub>), 4.32 (m, 1.1H, OCH<sub>2</sub>), 3.90 (m, 0.9H, OCH<sub>2</sub>), 3.27 (s, 1.35H, OMe), 3.25 (s,



1.65H, OMe), 3.03 (m, 1H, CH), 2.99 (s, 1.35H, NMe), 2.97 (s, 1.65H, NMe), 1.42 (dd, 2.7H,  $J = 6.9, 1.3$  Hz, Me), 1.39 (dd, 3.3H,  $J = 6.9, 1.7$  Hz, Me);  $^{13}\text{C}$  NMR (75 MHz,  $\text{C}_6\text{D}_6$ , 25 °C):  $\delta = 209.8$  (0.55C), 209.7 (0.45C), 164.2 (0.55CO), 164.1 (0.45CO), 156.5 (0.55C), 156.4 (0.45C), 143.7 (0.55C), 143.1 (0.45C), 138.1 (0.55C), 137.8 (0.45C), 132.1 (0.55C), 132.0 (0.45C), 128.8 (Ar, 0.55CH), 126.9 (Ar, 0.45CH), 119.8 (Ar, 0.55CH), 119.4 (Ar, 0.45CH), 118.9 (Ar, 2CH), 114.6 (Ar, 2CH), 107.5 (Ar, 0.55CH), 107.1 (Ar, 0.45CH), 89.9 (0.55CH, H3), 88.0 (0.55=CH), 87.6 (0.45=CH), 83.1 (0.45CH, H3), 75.8 (0.55=CH<sub>2</sub>), 75.5 (0.45=CH<sub>2</sub>), 68.8 (0.55OCH<sub>2</sub>), 68.6 (0.45OCH<sub>2</sub>), 58.3 (0.55CH, H4), 55.4 (0.45CH, H4), 54.9 (0.55OMe), 54.8 (0.45OMe), 35.0 (NMe), 32.0 (CH), 24.8 (2Me); IR ( $\text{CHCl}_3$ ):  $\nu = 2935, 1740$  (CO), 1512, 1258, 1043, 807, 736  $\text{cm}^{-1}$ ; HRMS (ES): calcd for  $\text{C}_{26}\text{H}_{29}\text{N}_2\text{O}_3[\text{M} + \text{H}]^+$ : 417.2178; found: 417.2163.

**$\beta$ -Lactam-Tethered Allene 1g.** From 382 mg (1.23 mmol) of the corresponding  $\beta$ -lactam-tethered alkyne, and after flash chromatography of the residue using hexanes/ethyl acetate (2:1) as eluent gave compound **1g** (274 mg, 68%) as a colorless solid; mp 93–94 °C;  $^1\text{H}$  NMR (300 MHz,  $\text{CDCl}_3$ , 25 °C):  $\delta = 7.33$  (d, 2H,  $J = 9.1$  Hz, ArH), 6.82 (d, 2H,  $J = 9.1$  Hz, ArH), 6.33 (d, 1H,  $J = 3.2$  Hz, ArH), 5.98 (dd, 1H,  $J = 3.1, 0.9$  Hz, ArH), 5.15 (d, 1H,  $J = 4.5$  Hz, H3), 5.08 (m, 1H,  $J = 7.0$  Hz, =CH), 4.99 (d, 1H,  $J = 4.5$  Hz, H4), 4.78 (m, 2H, =CH<sub>2</sub>), 4.04 (m, 2H, OCH<sub>2</sub>), 3.77 (s, 3H, OMe), 2.30 (d, 3H,  $J = 0.7$  Hz, Me);  $^{13}\text{C}$  NMR (75 MHz,  $\text{CDCl}_3$ , 25 °C):  $\delta = 209.8, 163.5$  (CO), 156.4, 152.9, 145.8, 130.7, 118.7 (Ar, 2CH), 114.3 (Ar, 2CH), 111.3 (Ar, CH), 106.9 (Ar, CH), 86.8 (=CH), 82.4 (CH, H3), 75.7 (=CH<sub>2</sub>), 69.0 (OCH<sub>2</sub>), 55.9 (CH, H4), 55.4 (OMe), 13.6 (Me); IR ( $\text{CHCl}_3$ ):  $\nu = 2919, 1755$  (CO), 1512, 1247, 1022, 829, 752  $\text{cm}^{-1}$ ; HRMS (ES): calcd for  $\text{C}_{19}\text{H}_{20}\text{NO}_4[\text{M} + \text{H}]^+$ : 326.1392; found: 326.1389.

**$\beta$ -Lactam-Tethered Allene 1h.** From 372 mg (1.2 mmol) of the corresponding  $\beta$ -lactam-tethered alkyne, and after flash chromatography of the residue using hexanes/ethyl acetate (3:1) as eluent gave compound **1h** (287 mg, 74%) as a colorless solid; mp 105–106 °C;  $^1\text{H}$  NMR (300 MHz,

CDCl<sub>3</sub>, 25 °C):  $\delta$  = 7.34 (m, 1H, ArH), 7.32 (d, 2H,  $J$  = 9.0 Hz, ArH), 7.19 (d, 1H,  $J$  = 2.9 Hz, ArH), 7.04 (dd, 1H,  $J$  = 5.1, 3.6 Hz, ArH), 6.80 (d, 2H,  $J$  = 9.1 Hz, ArH), 5.45 (d, 1H,  $J$  = 4.5 Hz, H3), 5.03 (d, 1H,  $J$  = 4.5 Hz, H4), 5.02 (m, 1H,  $J$  = 6.7 Hz, =CH), 4.76 (m, 2H, =CH<sub>2</sub>), 3.97 (m, 2H, OCH<sub>2</sub>), 3.75 (s, 3H, OMe); <sup>13</sup>C NMR (75 MHz, CDCl<sub>3</sub>, 25 °C):  $\delta$  = 209.7, 163.4 (CO), 156.5, 136.8, 130.4, 127.7 (Ar, CH), 126.9 (Ar, CH), 126.7 (Ar, CH), 118.8 (Ar, 2CH), 114.3 (Ar, 2CH), 86.7 (=CH), 82.5 (CH, H3), 75.8 (=CH<sub>2</sub>), 68.9 (OCH<sub>2</sub>), 58.1 (CH, H4), 55.4 (OMe); IR (CHCl<sub>3</sub>):  $\nu$  = 2930, 1749 (CO), 1511, 1246, 1116, 830, 708 cm<sup>-1</sup>; HRMS (ES): calcd for C<sub>18</sub>H<sub>18</sub>NO<sub>3</sub>S[M + H]<sup>+</sup>: 328.1007; found: 328.0996.

**$\beta$ -Lactam-Tethered Allene 1i.** From 51 mg (0.11 mmol) of the corresponding  $\beta$ -lactam-tethered alkyne, and after flash chromatography of the residue using hexanes/ethyl acetate (2:1) as eluent gave compound **1i** (32 mg, 60%) as a colorless oil; <sup>1</sup>H NMR (300 MHz, CDCl<sub>3</sub>, 25 °C):  $\delta$  = 7.70 (d, 1H,  $J$  = 8.3 Hz, ArH), 7.53 (t, 2H,  $J$  = 7.1 Hz, ArH), 7.40 (m, 3H, ArH), 7.27 (d, 2H,  $J$  = 8.9 Hz, ArH), 7.26 (m, 1H, ArH), 6.81 (m, 1H, ArH), 6.77 (d, 2H,  $J$  = 9.0 Hz, ArH), 5.46 (d, 1H,  $J$  = 4.7 Hz, H3), 5.16 (d, 1H,  $J$  = 4.7 Hz, H4), 5.11 (m, 1H,  $J$  = 6.7 Hz, =CH), 4.72 (m, 2H, =CH<sub>2</sub>), 4.10 (m, 2H, OCH<sub>2</sub>), 3.72 (s, 3H, OMe); <sup>13</sup>C NMR (75 MHz, CDCl<sub>3</sub>, 25 °C):  $\delta$  = 209.8, 163.7 (CO), 156.4, 153.1, 150.6, 130.6, 130.3, 130.1, 129.0 (Ar, 2CH), 128.6 (Ar, 2CH), 128.2 (Ar, CH), 127.7 (Ar, CH), 126.4 (Ar, 2CH), 123.9 (Ar, 2CH), 118.6 (Ar, 2CH), 117.6, 114.3 (Ar, 2CH), 107.5, 86.7 (=CH), 82.1 (CH, H3), 75.8 (=CH<sub>2</sub>), 68.9 (OCH<sub>2</sub>), 55.4 (CH, H4), 54.9 (OMe); IR (CHCl<sub>3</sub>):  $\nu$  = 2926, 1754 (CO), 1512, 1248, 1118, 831, 695 cm<sup>-1</sup>; HRMS (ES): calcd for C<sub>30</sub>H<sub>26</sub>NO<sub>4</sub>[M + H]<sup>+</sup>: 464.1862; found: 464.1849.

**$\beta$ -Lactam-Tethered Allene 1j.** From 169 mg (0.48 mmol) of the corresponding  $\beta$ -lactam-tethered alkyne, and after flash chromatography of the residue using hexanes/ethyl acetate (1:1) as eluent gave compound **1j** (133 mg, 77%) as a colorless solid; mp 87–88 °C; <sup>1</sup>H NMR (300 MHz, CDCl<sub>3</sub>, 25 °C):  $\delta$  = 7.54 (d, 1H,  $J$  = 7.7 Hz, ArH), 7.51 (d, 1H,  $J$  = 8.5 Hz, ArH), 7.36 (d, 2H,  $J$  = 9.2 Hz,

ArH), 7.28 (m, 2H, ArH), 6.80 (m, 1H, ArH), 6.81 (d, 2H,  $J = 8.9$  Hz, ArH), 5.35 (d, 1H,  $J = 4.7$  Hz, H3), 5.13 (d, 1H,  $J = 4.7$  Hz, H4), 5.04 (m, 1H,  $J = 6.7$  Hz, =CH), 4.68 (m, 2H, =CH<sub>2</sub>), 4.06 (m, 2H, OCH<sub>2</sub>), 3.75 (s, 3H, OMe); <sup>13</sup>C NMR (75 MHz, CDCl<sub>3</sub>, 25 °C):  $\delta = 209.8, 163.3$  (CO), 156.6, 155.1, 150.7, 130.4, 128.1, 124.5 (Ar, CH), 123.0 (Ar, CH), 121.2 (Ar, CH), 118.6 (Ar, 2CH), 114.4 (Ar, 2CH), 111.4 (Ar, CH), 107.0 (Ar, CH), 86.6 (=CH), 82.7 (CH, H3), 75.6 (=CH<sub>2</sub>), 69.3 (OCH<sub>2</sub>), 56.2 (CH, H4), 55.4 (OMe); IR (CHCl<sub>3</sub>):  $\nu = 2932, 1755$  (CO), 1512, 1250, 1115, 830, 750 cm<sup>-1</sup>; HRMS (ES): calcd for C<sub>22</sub>H<sub>20</sub>NO<sub>4</sub>[M + H]<sup>+</sup>: 362.1392; found: 362.1392.

**$\beta$ -Lactam-Tethered Allene 1k.** From 424 mg (1.1 mmol) of the corresponding  $\beta$ -lactam-tethered alkyne, and after flash chromatography of the residue using hexanes/ethyl acetate (1:1) as eluent gave compound **1k** (304 mg, 69%) as a colorless oil; <sup>1</sup>H NMR (300 MHz, CDCl<sub>3</sub>, 25 °C):  $\delta = 7.25$  (d, 2H,  $J = 8.9$  Hz, ArH), 6.77 (d, 2H,  $J = 9.0$  Hz, ArH), 6.16 (d, 1H,  $J = 2.0$  Hz, ArH), 6.07 (d, 1H,  $J = 2.0$  Hz, ArH), 5.69 (d, 1H,  $J = 5.0$  Hz, H3), 4.94 (d, 1H,  $J = 5.0$  Hz, H4), 4.88 (m, 1H,  $J = 7.1$  Hz, =CH), 4.71 (m, 2H, =CH<sub>2</sub>), 4.02 (m, 1H, OCHH), 3.89 (s, 3H, OMe), 3.87 (m, 1H, OCHH), 3.80 (s, 3H, OMe), 3.73 (s, 3H, OMe), 3.62 (s, 3H, OMe); <sup>13</sup>C NMR (75 MHz, CDCl<sub>3</sub>, 25 °C):  $\delta = 209.6, 164.9$  (CO), 162.1, 161.4, 159.8, 155.6, 131.8, 118.0 (Ar, 2CH), 114.1 (Ar, 2CH), 101.5, 91.6 (Ar, CH), 90.6 (Ar, CH), 87.1 (=CH), 81.7 (CH, H3), 75.3 (=CH<sub>2</sub>), 69.2 (OCH<sub>2</sub>), 56.2 (CH, H4), 55.9 (OMe), 55.4 (OMe), 55.2 (OMe), 54.0 (OMe); IR (CHCl<sub>3</sub>):  $\nu = 2939, 1749$  (CO), 1513, 1122, 829, 750 cm<sup>-1</sup>; HRMS (ES): calcd for C<sub>23</sub>H<sub>26</sub>NO<sub>6</sub>[M + H]<sup>+</sup>: 412.1760; found: 412.1763.

**$\beta$ -Lactam-Tethered Allene 1l.** From 264 mg (0.79 mmol) of the corresponding  $\beta$ -lactam-tethered alkyne, and after flash chromatography of the residue using hexanes/ethyl acetate (3:1) as eluent gave compound **1l** (204 mg, 74%) as a colorless solid; mp 106–107 °C; <sup>1</sup>H NMR (300 MHz, CDCl<sub>3</sub>, 25 °C):  $\delta = 7.44$  (m, 2H, ArH), 7.42 (d, 2H,  $J = 8.9$  Hz, ArH), 7.32 (m, 3H, ArH), 6.87 (d, 2H,  $J = 16.1$  Hz, =CH), 6.83 (d, 2H,  $J = 8.9$  Hz, ArH), 6.36 (dd, 1H,  $J = 15.9, 8.8$  Hz, =CH), 5.26 (m, 1H,  $J = 6.9$  Hz, =CH), 4.95 (d, 1H,  $J = 4.7$  Hz, H3), 4.78 (m, 2H, =CH<sub>2</sub>), 4.77 (d, 1H,  $J = 4.4$

Hz, H4), 4.20 (m, 2H, OCH<sub>2</sub>), 3.77 (s, 3H, OMe); <sup>13</sup>C NMR (75 MHz, CDCl<sub>3</sub>, 25 °C): δ = 209.8, 163.6 (CO), 156.3, 136.4, 135.9 (=CH), 131.2, 128.7 (Ar, 2CH), 128.4 (=CH), 126.8 (Ar, 2CH), 123.9 (Ar, CH), 118.7 (Ar, 2CH), 114.3 (Ar, 2CH), 86.9 (=CH), 82.4 (CH, H3), 75.9 (=CH<sub>2</sub>), 69.0 (OCH<sub>2</sub>), 61.1 (CH, H4), 55.4 (OMe); IR (CHCl<sub>3</sub>): ν = 2912, 1742 (CO), 1511, 1244, 1118, 833, 753 cm<sup>-1</sup>; HRMS (ES): calcd for C<sub>22</sub>H<sub>22</sub>NO<sub>3</sub> [M + H]<sup>+</sup>: 348.1600; found: 348.1596.

**β-Lactam-Tethered Allene 1m.** From 250 mg (0.69 mmol) of the corresponding β-lactam-tethered alkyne, and after flash chromatography of the residue using hexanes/ethyl acetate (2:1) as eluent gave compound **1m** (200 mg, 77%) as a colorless solid; mp 98–99 °C; <sup>1</sup>H NMR (300 MHz, CDCl<sub>3</sub>, 25 °C): δ = 7.42 (d, 2H, *J* = 9.1 Hz, ArH), 7.38 (d, 2H, *J* = 8.8 Hz, ArH), 6.87 (d, 2H, *J* = 8.9 Hz, ArH), 6.83 (d, 2H, *J* = 9.1 Hz, ArH), 6.80 (d, 1H, *J* = 16.3 Hz, =CH), 6.20 (dd, 1H, *J* = 15.9, 8.9 Hz, =CH), 5.26 (m, 1H, *J* = 6.7 Hz, =CH), 4.93 (d, 1H, *J* = 4.7 Hz, H3), 4.77 (d, 1H, *J* = 4.5 Hz, H4), 4.76 (m, 2H, =CH<sub>2</sub>), 4.20 (m, 2H, OCH<sub>2</sub>), 3.82 (s, 3H, OMe), 3.76 (s, 3H, OMe); <sup>13</sup>C NMR (75 MHz, CDCl<sub>3</sub>, 25 °C): δ = 209.8, 163.7 (CO), 159.8, 156.3, 135.9 (=CH), 131.2, 128.7, 128.1 (Ar, 2CH), 121.4 (=CH), 118.7 (Ar, 2CH), 114.3 (Ar, 2CH), 114.0 (Ar, 2CH), 87.0 (=CH), 82.4 (CH, H3), 75.9 (=CH<sub>2</sub>), 69.0 (OCH<sub>2</sub>), 61.3 (CH, H4), 55.4 (OMe), 55.3 (OMe); IR (CHCl<sub>3</sub>): ν = 2912, 1743 (CO), 1511, 1246, 1118, 832, 750 cm<sup>-1</sup>; HRMS (ES): calcd for C<sub>23</sub>H<sub>24</sub>NO<sub>4</sub> [M + H]<sup>+</sup>: 378.1705; found: 378.1711.

**β-Lactam-Tethered Allene 1n.** From 68 mg (0.16 mmol) of the corresponding β-lactam-tethered alkyne (mixture of isomers = 75:25), and after flash chromatography of the residue using hexanes/ethyl acetate (3:1) as eluent gave compound **1n** [(26 mg, 38%, mixture of isomers = 75:25) + (23 mg, 33%, isomerically pure)]. **β-Lactam-Tethered Allene 1n (d.r. = 75:25):** Colorless oil; <sup>1</sup>H NMR (300 MHz, CDCl<sub>3</sub>, 25 °C): δ = 8.07 (dd, 0.75H, *J* = 7.9, 0.7 Hz, ArH), 8.06 (dd, 0.25H, *J* = 7.9, 0.8 Hz, ArH), 7.64 (dd, 0.75H, *J* = 8.2, 0.7 Hz, ArH), 7.63 (dd, 0.25H, *J* = 8.2, 0.7 Hz, ArH), 7.44 (m, 0.5H, ArH), 7.43 (d, 1.5H, *J* = 9.1 Hz, ArH), 7.32 (t, 0.75H, *J* = 8.0 Hz, ArH), 7.31 (t,

0.25H,  $J = 8.0$  Hz, ArH), 7.15 (s, 0.75H, ArH), 7.11 (s, 0.25H, ArH), 6.86 (m, 0.5H, ArH), 6.85 (d, 1.5H,  $J = 9.0$  Hz, ArH), 6.02 (dd, 0.25H,  $J = 5.1, 0.8$  Hz, H3), 5.99 (dd, 0.75H,  $J = 4.8, 0.6$  Hz, H3), 5.14 (d, 1H,  $J = 5.0$  Hz, H4), 5.11 (m, 1H, =CH), 4.76 (m, 1.5H, =CH<sub>2</sub>), 4.60 (m, 0.5H, =CH<sub>2</sub>), 4.18 (m, 0.25H, OCH), 3.91 (m, 0.75H, OCH), 3.79 (s, 3H, NMe), 3.78 (s, 3H, OMe), 1.15 (d, 0.75H,  $J = 6.3$  Hz, Me), 0.80 (d, 2.25H,  $J = 6.3$  Hz, Me); <sup>13</sup>C NMR (75 MHz, CDCl<sub>3</sub>, 25 °C):  $\delta = 208.5, 165.0$  (CO), 156.1, 139.8, 133.2, 130.9, 120.5 (Ar, CH), 118.8 (Ar, 2CH), 118.3 (Ar, CH), 116.2 (Ar, CH), 114.4 (Ar, 2CH), 107.9, 92.2 (=CH), 82.4 (CH, H3), 76.3 (=CH<sub>2</sub>), 75.1 (OCH), 57.2 (CH, H4), 55.4 (OMe), 33.5 (NMe), 21.0 (Me); IR (CHCl<sub>3</sub>):  $\nu = 2916, 1740$  (CO), 1514, 1240, 1112, 832, 752 cm<sup>-1</sup>; HRMS (ES): calcd for C<sub>24</sub>H<sub>24</sub>N<sub>3</sub>O<sub>5</sub>[M + H]<sup>+</sup>: 434.1716; found: 434.1711.  **$\beta$ -Lactam-Tethered Allene 1n (isomerically pure)**: Colorless solid; mp 110–111 °C; <sup>1</sup>H NMR (300 MHz, CDCl<sub>3</sub>, 25 °C):  $\delta = 8.06$  (dd, 1H,  $J = 7.9, 0.6$  Hz, ArH), 7.63 (d, 1H,  $J = 8.1, 0.7$  Hz, ArH), 7.44 (d, 2H,  $J = 9.1$  Hz, ArH), 7.31 (t, 1H,  $J = 8.0$  Hz, ArH), 7.11 (s, 1H, ArH), 6.86 (d, 2H,  $J = 9.19$  Hz, ArH), 6.03 (d, 1H,  $J = 4.7$  Hz, H3), 5.08 (d, 1H,  $J = 5.1$  Hz, H4), 4.64 (m, 1H, =CH), 4.58 (m, 2H, =CH<sub>2</sub>), 4.18 (m, 1H, OCH), 3.79 (s, 3H, NMe), 3.78 (s, 3H, OMe), 1.16 (d, 3H,  $J = 6.3$  Hz, Me); <sup>13</sup>C NMR (75 MHz, CDCl<sub>3</sub>, 25 °C):  $\delta = 208.0, 165.5$  (CO), 156.1, 139.8, 133.0, 131.0, 120.5 (Ar, CH), 118.8 (Ar, 2CH), 118.2 (Ar, CH), 116.2 (Ar, CH), 114.4 (Ar, 2CH), 108.2, 92.3 (=CH), 82.5 (CH, H3), 76.2 (=CH<sub>2</sub>), 75.1 (OCH), 57.2 (CH, H4), 55.5 (OMe), 33.5 (NMe), 20.7 (Me); IR (CHCl<sub>3</sub>):  $\nu = 2915, 1740$  (CO), 1515, 1243, 1110, 832, 753 cm<sup>-1</sup>; HRMS (ES): calcd for C<sub>24</sub>H<sub>24</sub>N<sub>3</sub>O<sub>5</sub>[M + H]<sup>+</sup>: 434.1716; found: 434.1711.

**$\beta$ -Lactam-Tethered Allene 1o**. From 101 mg (0.31 mmol) of the corresponding  $\beta$ -lactam-tethered alkyne (mixture of isomers = 70:30), and after flash chromatography of the residue using hexanes/ethyl acetate (3:1) as eluent gave compound **1o** (58 mg, 55%, mixture of isomers = 70:30) as a colorless oil; <sup>1</sup>H NMR (300 MHz, CDCl<sub>3</sub>, 25 °C):  $\delta = 7.33$  (d, 1.4H,  $J = 8.9$  Hz, ArH), 7.32 (d, 0.6H,  $J = 8.9$  Hz, ArH), 6.82 (d, 2H,  $J = 9.0$  Hz, ArH), 6.32 (d, 1H,  $J = 3.0$  Hz, ArH), 5.97 (d, 1H,  $J = 1.8$  Hz, ArH), 5.13 (m, 1H, H3), 5.11 (m, 0.7H, H4), 5.09 (m, 1H, =CH), 5.01 (d, 0.3H,  $J = 4.7$

Hz, H4), 4.82 (m, 1.4H, =CH<sub>2</sub>), 4.72 (m, 0.6H, =CH<sub>2</sub>), 4.19 (m, 0.3H, OCH), 3.80 (m, 0.7H, OCH), 3.76 (s, 3H, OMe), 2.30 (s, 3H, Me), 1.26 (d, 0.9H, *J* = 6.3 Hz, Me), 1.08 (d, 2.1H, *J* = 6.3 Hz, Me); <sup>13</sup>C NMR (75 MHz, CDCl<sub>3</sub>, 25 °C): δ = 208.9 (M), 208.4 (m), 163.8 (CO, m), 163.4 (CO, M), 156.3, 152.8 (M), 152.6 (m), 146.0 (M + m), 130.8 (M + m), 118.61 (Ar, 2C, M), 118.59 (Ar, 2C, m), 114.2 (Ar, 2CH), 111.3 (Ar, CH, M), 111.1 (Ar, CH, m), 106.8 (Ar, CH), 92.3 (=CH, m), 91.6 (=CH, M), 81.7 (H3, m), 80.6 (H3, M), 76.10 (=CH<sub>2</sub>, m), 76.06 (=CH<sub>2</sub>, M), 76.0 (OCH, m), 74.5 (OCH, M), 56.6 (H4, m), 55.9 (H4, M), 55.4 (OMe, M + m), 21.1 (Me, m), 20.8 (Me, M), 13.6 (Me, M + m); IR (CHCl<sub>3</sub>): ν = 2915, 1756 (CO), 1510, 1244, 1025, 826, 752 cm<sup>-1</sup>; HRMS (ES): calcd for C<sub>20</sub>H<sub>22</sub>NO<sub>4</sub>[*M* + H]<sup>+</sup>: 340.1549; found: 340.1542.

**Bis(β-Lactam)-Tethered Bis(Allene) 1p.** From 110 mg (0.21 mmol) of the corresponding bis(β-lactam)-tethered bis(alkyne)(mixture of isomers = 80:20), and after flash chromatography of the residue using hexanes/ethyl acetate (2:1) as eluent gave compound **1p** (62 mg, 53%, mixture of isomers = 80:20) as a colorless solid; mp 112–113°C; <sup>1</sup>H NMR (300 MHz, CDCl<sub>3</sub>, 25 °C): δ = 7.30 (d, 3.2H, *J* = 9.2 Hz, ArH), 7.20 (d, 0.8H, *J* = 9.2 Hz, ArH), 6.80 (d, 3.2H, *J* = 9.1 Hz, ArH), 6.71 (d, 0.8H, *J* = 9.0 Hz, ArH), 6.52 (s, 0.4H, ArH), 6.49 (s, 1.6H, ArH), 5.20 (d, 1.6H, *J* = 4.5 Hz, H3), 5.19 (d, 0.4H, *J* = 4.4 Hz, H3), 5.02 (m, 0.4H, =CH), 4.91 (d, 2H, *J* = 4.7 Hz, H4), 4.91 (m, 1.6H, *J* = 7.0 Hz, =CH), 4.79 (m, 0.8H, =CH<sub>2</sub>), 4.74 (m, 3.2H, =CH<sub>2</sub>), 4.03 (m, 0.8H, OCH<sub>2</sub>), 3.89 (m, 3.2H, OCH<sub>2</sub>), 3.75 (s, 4.8H, OMe), 3.74 (s, 1.2H, OMe); <sup>13</sup>C NMR (75 MHz, CDCl<sub>3</sub>, 25 °C): δ = 209.7 (2C, M + m), 163.3 (2CO, M + m), 156.5 (2C, M), 156.4 (2C, m), 148.6 (2C, M + m), 130.4 (2C, M + m), 118.5 (4C, Ar, CH, M), 118.4 (4C, Ar, CH, m), 114.3 (4C, Ar, CH, M + m), 112.0 (2C, Ar, CH, m), 111.7 (2C, Ar, CH, M), 86.7 (2C, =CH, m), 86.6 (2C, =CH, M), 82.3 (2C, CH<sub>3</sub>, M + m), 76.0 (2C, =CH<sub>2</sub>, M), 75.9 (2C, =CH<sub>2</sub>, m), 69.2 (2C, OCH<sub>2</sub>, M), 69.0 (2C, OCH<sub>2</sub>, m), 55.6 (2C, CH<sub>4</sub>, M + m), 55.4 (2C, OMe, m), 55.3 (2C, OMe, M); IR (CHCl<sub>3</sub>): ν = 2925, 1750 (CO), 1511, 1253, 1020, 832, 751 cm<sup>-1</sup>; HRMS (ES): calcd for C<sub>32</sub>H<sub>31</sub>N<sub>2</sub>O<sub>7</sub>[*M* + H]<sup>+</sup>: 555.2131; found: 555.2136.

**(Vinylloxy)buta-1,2-diene 3h.** From 65 mg (0.40 mmol) of alkyne **F**, and after flash chromatography of the residue using hexanes/ethyl acetate (20:1) as eluent gave compound **3h** (44 mg, 62%) as a colorless oil;  $^1\text{H}$  NMR (300 MHz,  $\text{C}_6\text{D}_6$ , 25 °C):  $\delta$  = 7.01 (d, 1H,  $J$  = 3.5 Hz, Ar), 6.92 (d, 1H,  $J$  = 5.1 Hz, Ar), 6.82 (dd, 1H,  $J$  = 5.1, 3.4 Hz, Ar), 5.84 (d, 1H,  $J$  = 6.4 Hz, =CH), 5.58 (d, 1H,  $J$  = 6.5 Hz, =CH), 5.06 (qu, 1H,  $J$  = 6.7 Hz, =CH), 4.51 (dt, 2H,  $J$  = 6.6, 2.5 Hz, =CH<sub>2</sub>), 3.99 (dt, 2H,  $J$  = 6.9, 2.5 Hz, OCH<sub>2</sub>);  $^{13}\text{C}$  NMR (75 MHz,  $\text{C}_6\text{D}_6$ , 25 °C):  $\delta$  = 209.5, 143.6 (=CH), 138.8, 126.5 (Ar, CH), 125.2 (Ar, CH), 124.4 (Ar, CH), 101.7 (=CH), 87.7 (=CH), 76.3 (=CH<sub>2</sub>), 70.4 (OCH<sub>2</sub>); IR ( $\text{CHCl}_3$ ):  $\nu$  = 2940, 1650, 1359, 695, 666  $\text{cm}^{-1}$ ; HRMS (ES): calcd for  $\text{C}_{10}\text{H}_{11}\text{OS}[M]^+$ : 179.0531; found: 179.0520.

### **General Procedure for the Gold-Catalyzed Rearrangement Reaction of $\beta$ -Lactam-Tethered**

**Allenes 1. Preparation of Cage Adducts 2a–p.** The appropriate allene **1** (0.10 mmol) was added to a stirred solution of  $[\text{AuClIPr}]$  (0.005 mmol) and  $\text{AgSbF}_6$  (0.005 mmol) in 1,2-dichloroethane (1.3 mL) under argon. The resulting mixture was stirred under argon atmosphere at the appropriate temperature until disappearance of the starting material (TLC). After filtration through a pad of Celite, the mixture was extracted with ethyl acetate (3 x 3 mL), and the combined extracts were washed twice with brine. The organic layer was dried ( $\text{MgSO}_4$ ) and concentrated under reduced pressure. Chromatography of the residue eluting with hexanes/ethyl acetate mixtures gave analytically pure cage adducts **2**.

**Cage Adduct 2a.** From 30 mg (0.08 mmol) of the  $\beta$ -lactam-tethered allene **1a**, and after flash chromatography of the residue using hexanes/ethyl acetate (5:1) as eluent gave compound **2a** (15 mg, 83%) as a colorless oil;  $^1\text{H}$  NMR (300 MHz,  $\text{CDCl}_3$ , 25 °C):  $\delta$  = 7.67 (d, 1H,  $J$  = 7.9 Hz, ArH), 7.29 (d, 1H,  $J$  = 8.5 Hz, ArH), 7.22 (t, 1H,  $J$  = 6.9 Hz, ArH), 7.10 (td, 1H,  $J$  = 7.9, 1.2 Hz, ArH), 6.99 (s, 1H, ArH), 4.21 (d, 1H,  $J$  = 1.5 Hz, OCH), 4.12 (t, 1H,  $J$  = 3.9 Hz, OCH), 3.76 (s, 3H, NMe), 3.19 (s, 1H, CH), 1.77 (d, 1H,  $J$  = 10.6 Hz, CHH), 1.57 (d, 1H,  $J$  = 10.6 Hz, CHH), 1.51 (m,

1H, CH), 1.46 (m, 1H, CH);  $^{13}\text{C}$  NMR (75 MHz,  $\text{CDCl}_3$ , 25 °C):  $\delta$  = 136.7, 127.6, 126.6 (Ar, CH), 121.3 (Ar, CH), 118.7 (Ar, CH), 118.5 (Ar, CH), 112.5, 109.2 (Ar, CH), 73.7 (OCH), 51.4 (OCH), 40.0 (CH), 33.2 ( $\text{CH}_2$ ), 32.7 (NMe), 16.0 (CH), 11.7 (CH); IR ( $\text{CHCl}_3$ ):  $\nu$  = 2936, 1685, 1475, 1062, 795, 741  $\text{cm}^{-1}$ ; HRMS (ES): calcd for  $\text{C}_{15}\text{H}_{16}\text{NO}[M + \text{H}]^+$ : 226.1232; found: 226.1226.

**Cage Adduct 2b.** From 99 mg (0.22 mmol) of the  $\beta$ -lactam-tethered allene **1b**, and after flash chromatography of the residue using hexanes/ethyl acetate (4:1) as eluent gave compound **2b** (43 mg, 64%) as a colorless oil;  $^1\text{H}$  NMR (300 MHz,  $\text{CDCl}_3$ , 25 °C):  $\delta$  = 7.73 (d, 1H,  $J$  = 1.5 Hz, ArH), 7.28 (dd, 1H,  $J$  = 8.6, 1.7 Hz, ArH), 7.15 (d, 1H,  $J$  = 8.6 Hz, ArH), 6.99 (s, 1H, ArH), 4.18 (d, 1H,  $J$  = 1.9 Hz, OCH), 4.11 (t, 1H,  $J$  = 4.0 Hz, OCH), 3.73 (s, 3H, NMe), 3.10 (s, 1H, CH), 1.76 (d, 1H,  $J$  = 10.6 Hz,  $\text{CHH}$ ), 1.53 (d, 1H,  $J$  = 10.8 Hz,  $\text{CHH}$ ), 1.49 (m, 2H, 2CH);  $^{13}\text{C}$  NMR (75 MHz,  $\text{CDCl}_3$ , 25 °C):  $\delta$  = 135.4, 129.2, 127.8 (Ar, CH), 124.1 (Ar, CH), 121.1 (Ar, CH), 112.3, 112.0, 110.7 (Ar, CH), 73.6 (OCH), 51.3 (OCH), 39.9 (CH), 33.2 ( $\text{CH}_2$ ), 32.8 (NMe), 15.9 (CH), 11.7 (CH); IR ( $\text{CHCl}_3$ ):  $\nu$  = 2935, 1717, 1475, 1059, 792  $\text{cm}^{-1}$ ; HRMS (ES): calcd for  $\text{C}_{15}\text{H}_{15}\text{BrNO}[M + \text{H}]^+$ : 304.0337; found: 304.0336.

**Cage Adduct 2c.** From 35 mg (0.08 mmol) of the  $\beta$ -lactam-tethered allene **1c**, and after flash chromatography of the residue using hexanes/ethyl acetate (2:1) as eluent gave compound **2c** (19 mg, 85%) as a colorless solid; mp 107–108 °C;  $^1\text{H}$  NMR (300 MHz,  $\text{CDCl}_3$ , 25 °C):  $\delta$  = 7.86 (d, 1H,  $J$  = 7.9 Hz, ArH), 7.50 (d, 1H,  $J$  = 8.0 Hz, ArH), 7.25 (m, 2H, ArH), 4.18 (d, 1H,  $J$  = 1.6 Hz, OCH), 4.13 (t, 1H,  $J$  = 3.6 Hz, OCH), 3.84 (s, 3H, NMe), 3.44 (s, 1H, ArH), 1.83 (d, 1H,  $J$  = 10.2 Hz,  $\text{CHH}$ ), 1.51 (dt, 1H,  $J$  = 10.5, 1.9 Hz,  $\text{CHH}$ ), 1.47 (t, 2H,  $J$  = 3.9 Hz, 2CH);  $^{13}\text{C}$  NMR (75 MHz,  $\text{CDCl}_3$ , 25 °C):  $\delta$  = 143.0, 139.4, 131.9 (Ar, CH), 119.9 (Ar, CH), 119.3, 117.2 (Ar, CH), 115.1 (Ar, CH), 112.2, 74.3 (OCH), 51.7 (OCH), 41.4 (CH), 33.2 ( $\text{CH}_2$ ), 33.0 (NMe), 15.8 (CH), 11.7 (CH); IR ( $\text{CHCl}_3$ ):  $\nu$  = 2923, 1681, 1511, 1345, 750  $\text{cm}^{-1}$ ; HRMS (ES): calcd for  $\text{C}_{15}\text{H}_{15}\text{N}_2\text{O}_3[M + \text{H}]^+$ : 271.1083; found: 271.1060.



**Cage Adduct 2d.** From 38mg (0.09 mmol) of the  $\beta$ -lactam-tethered allene **1d**, and after flash chromatography of the residue using hexanes/ethyl acetate (5:1) as eluent gave compound **2d** (18 mg, 74%) as a colorless solid; mp 100–101 °C;  $^1\text{H}$  NMR (300 MHz,  $\text{C}_6\text{D}_6$ , 25 °C):  $\delta$  = 7.22 (d, 1H,  $J$  = 2.3 Hz, ArH), 7.12 (dd, 1H,  $J$  = 8.9, 2.4 Hz, ArH), 6.94 (d, 1H,  $J$  = 8.6 Hz, ArH), 6.87 (s, 1H, ArH), 4.12 (s, 1H, OCH), 3.90 (t, 1H,  $J$  = 3.9 Hz, OCH), 3.62 (s, 3H, NMe), 3.03 (s, 1H, CH), 2.97 (s, 3H, OMe), 1.39 (m, 2H,  $\text{CH}_2$ ), 1.26 (t, 1H,  $J$  = 4.8 Hz, CH), 1.08 (t, 1H,  $J$  = 4.7 Hz, CH);  $^{13}\text{C}$  NMR (75 MHz,  $\text{C}_6\text{D}_6$ , 25 °C):  $\delta$  = 154.6, 132.7, 128.9, 112.5, 111.9 (Ar, CH), 110.3 (Ar, CH), 101.2 (Ar, CH), 74.0 (OCH), 55.6 (OMe), 51.6 (OCH), 40.5 (CH), 33.6 ( $\text{CH}_2$ ), 32.1 (NMe), 17.1 (CH), 12.2 (CH); IR ( $\text{CHCl}_3$ ):  $\nu$  = 2935, 1654, 1461, 1060, 776, 720  $\text{cm}^{-1}$ ; HRMS (ES): calcd for  $\text{C}_{16}\text{H}_{18}\text{NO}_2[\text{M} + \text{H}]^+$ : 256.1338; found: 256.1326.

**Cage Adduct 2e.** From 33 mg (0.08 mmol) of the  $\beta$ -lactam-tethered allene **1e**, and after flash chromatography of the residue using hexanes/ethyl acetate (5:1) as eluent gave compound **2e** (12 mg, 57%) as a colorless oil;  $^1\text{H}$  NMR (300 MHz, acetone- $d_6$ , 25 °C):  $\delta$  = 7.39 (dd, 1H,  $J$  = 7.6, 0.9 Hz, ArH), 6.89 (s, 1H, ArH), 6.83 (m, 2H, ArH), 4.07 (d, 1H,  $J$  = 1.9 Hz, OCH), 4.02 (t, 1H,  $J$  = 4.0 Hz, OCH), 4.01 (s, 3H, NMe), 3.09 (s, 1H, CH), 2.71 (s, 3H, Me), 1.73 (d, 1H,  $J$  = 9.9 Hz, CHH), 1.40 (m, 1H, CHH), 1.38 (m, 1H, CH), 1.36 (m, 1H, CH);  $^{13}\text{C}$  NMR (75 MHz, acetone- $d_6$ , 25 °C):  $\delta$  = 136.4, 130.0, 129.4 (Ar, CH), 124.5 (Ar, CH), 121.9, 119.5 (Ar, CH), 117.5 (Ar, CH), 113.1, 74.0 (OCH), 51.8 (OCH), 40.7 (CH), 36.7 (NMe), 33.8 ( $\text{CH}_2$ ), 19.8 (Me), 16.5 (CH), 12.1 (CH); IR ( $\text{CHCl}_3$ ):  $\nu$  = 2940, 1683, 1475, 1054, 790, 732  $\text{cm}^{-1}$ ; HRMS (ES): calcd for  $\text{C}_{16}\text{H}_{18}\text{NO}[\text{M} + \text{H}]^+$ : 240.1388; found: 240.1387.

**Cage Adduct 2f.** From 38 mg (0.09 mmol) of the  $\beta$ -lactam-tethered allene **1f**, and after flash chromatography of the residue using hexanes/ethyl acetate (5:1) as eluent gave compound **2f** (14 mg, 60%) as a colorless solid; mp 96–97 °C;  $^1\text{H}$  NMR (300 MHz,  $\text{C}_6\text{D}_6$ , 25 °C):  $\delta$  = 7.62 (d, 1H,  $J$  = 8.3 Hz, ArH), 7.17 (m, 1H, ArH), 7.02 (d, 1H,  $J$  = 0.7 Hz, ArH), 6.84 (s, 1H, ArH), 4.11 (d, 1H,  $J$  =

1.2 Hz, OCH), 3.90 (t, 1H,  $J = 3.8$  Hz, OCH), 3.06 (m, 1H, CH), 3.04 (s, 1H, CH), 3.02 (s, 3H, NMe), 1.40 (d, 6H,  $J = 7.0$  Hz, 2Me), 1.36 (m, 2H, CH<sub>2</sub>), 1.25 (t, 1H,  $J = 4.7$  Hz, CH), 1.07 (t, 1H,  $J = 4.7$  Hz, CH); <sup>13</sup>C NMR (75 MHz, C<sub>6</sub>D<sub>6</sub>, 25 °C):  $\delta = 142.6, 137.7, 127.1, 126.5$  (Ar, CH), 119.0 (Ar, CH), 118.3 (Ar, CH), 112.9, 106.7 (Ar, CH), 74.0 (OCH), 51.6 (OCH), 40.6 (CH), 35.1 (NMe), 33.6 (CH<sub>2</sub>), 31.9 (CH), 25.0 (2CH<sub>3</sub>), 17.0 (CH), 12.2 (CH); IR (CHCl<sub>3</sub>):  $\nu = 2935, 1676, 1475, 1078, 792, 737$  cm<sup>-1</sup>; HRMS (ES): calcd for C<sub>18</sub>H<sub>22</sub>NO[M + H]<sup>+</sup>: 268.1701; found: 268.1709.

**Cage Adduct 2g.** From 50 mg (0.15 mmol) of the  $\beta$ -lactam-tethered allene **1g**, and after flash chromatography of the residue using hexanes/ethyl acetate (6:1) as eluent gave compound **2g** (17 mg, 65%) as a colorless oil; <sup>1</sup>H NMR (300 MHz, CDCl<sub>3</sub>, 25 °C):  $\delta = 5.98$  (d, 1H,  $J = 2.9$  Hz, ArH), 5.87 (dd, 1H,  $J = 2.9, 0.9$  Hz, ArH), 4.25 (d, 1H,  $J = 2.0$  Hz, OCH), 4.07 (t, 1H,  $J = 4.0$  Hz, OCH), 2.89 (s, 1H, CH), 2.26 (s, 3H, Me), 1.64 (dd, 1H,  $J = 10.5, 0.9$  Hz, CHH), 1.48 (d, 1H,  $J = 10.4$  Hz, CHH), 1.46 (m, 1H, CH), 1.45 (m, 1H, CH); <sup>13</sup>C NMR (75 MHz, CDCl<sub>3</sub>, 25 °C):  $\delta = 152.2, 150.4, 106.6$  (Ar, CH), 106.0 (Ar, CH), 72.7 (OCH), 51.2 (OCH), 42.8 (CH), 32.9 (CH<sub>2</sub>), 14.4 (CH), 13.5 (Me), 11.3 (CH); IR (CHCl<sub>3</sub>):  $\nu = 2927, 1712, 1513, 1250, 927, 799, 755$  cm<sup>-1</sup>; HRMS (ES): calcd for C<sub>11</sub>H<sub>13</sub>O<sub>2</sub>[M + H]<sup>+</sup>: 177.0916; found: 177.0904.

**Cage Adduct 2h.** From 50 mg (0.15 mmol) of the  $\beta$ -lactam-tethered allene **1h**, and after flash chromatography of the residue using hexanes/ethyl acetate (6:1) as eluent gave compound **2h** (18 mg, 68%) as a colorless oil; <sup>1</sup>H NMR (300 MHz, CDCl<sub>3</sub>, 25 °C):  $\delta = 7.17$  (dd, 1H,  $J = 5.1, 1.3$  Hz, ArH), 6.94 (dd, 1H,  $J = 5.0, 3.4$  Hz, ArH), 6.90 (d, 1H,  $J = 3.4$  Hz, ArH), 4.16 (m, 1H, OCH), 4.15 (t, 1H,  $J = 4.1$  Hz, OCH), 3.21 (s, 1H, CH), 1.71 (d, 1H,  $J = 10.5$  Hz, CHH), 1.55 (m, 1H, CHH), 1.51 (m, 1H, CH), 1.49 (m, 1H, CH); <sup>13</sup>C NMR (75 MHz, CDCl<sub>3</sub>, 25 °C):  $\delta = 142.9, 126.2$  (Ar, CH), 124.3 (Ar, CH), 123.9 (Ar, CH), 74.8 (OCH), 51.6 (OCH), 44.7 (CH), 33.3 (CH<sub>2</sub>), 17.9 (CH), 12.5 (CH); IR (CHCl<sub>3</sub>):  $\nu = 2920, 1717, 1510, 1200, 927, 796, 750$  cm<sup>-1</sup>; HRMS (ES): calcd for C<sub>10</sub>H<sub>11</sub>OS[M + H]<sup>+</sup>: 179.0531; found: 179.0518.

**Cage Adduct 2i.** From 75 mg (0.16 mmol) of the  $\beta$ -lactam-tethered allene **1i**, and after flash chromatography of the residue using hexanes/ethyl acetate (4:1) as eluent gave compound **2i** (23 mg, 45%) as a colorless solid; mp 103–104 °C;  $^1\text{H}$  NMR (300 MHz,  $\text{CDCl}_3$ , 25 °C):  $\delta$  = 7.73 (dd, 2H,  $J$  = 8.5, 1.3 Hz, ArH), 7.67 (dd, 2H,  $J$  = 8.5, 1.4 Hz, ArH), 7.42 (m, 4H, ArH), 7.29 (m, 2H, ArH), 6.87 (s, 1H, ArH), 4.28 (d, 1H,  $J$  = 1.9 Hz, OCH), 4.20 (t, 1H,  $J$  = 3.8 Hz, OCH), 3.13 (s, 1H, CH), 1.75 (d, 1H,  $J$  = 10.6 Hz, CHH), 1.56 (m, 1H, CHH), 1.53 (m, 1H, CH), 1.52 (m, 1H, CH);  $^{13}\text{C}$  NMR (75 MHz,  $\text{CDCl}_3$ , 25 °C):  $\delta$  = 152.1, 148.5, 131.5, 130.8, 128.6 (4C, Ar, CH), 127.1 (2C, Ar, CH), 126.0 (2C, Ar, CH), 123.7 (2C, Ar, CH), 122.1 108.4 (Ar, CH), 74.4 (OCH), 51.8 (OCH), 40.3 (CH), 33.5 ( $\text{CH}_2$ ), 16.6 (CH), 11.8 (CH); IR ( $\text{CHCl}_3$ ):  $\nu$  = 2930, 1715, 1513, 1265, 996, 795  $\text{cm}^{-1}$ ; HRMS (ES): calcd for  $\text{C}_{22}\text{H}_{19}\text{O}_2$  [ $M + \text{H}$ ] $^+$ : 315.1385; found: 315.1374.

**Cage Adduct 2j.** From 60 mg (0.17 mmol) of the  $\beta$ -lactam-tethered allene **1j**, and after flash chromatography of the residue using hexanes/ethyl acetate (6:1) as eluent gave compound **2j** (19 mg, 35%) as a colorless oil;  $^1\text{H}$  NMR (300 MHz,  $\text{CDCl}_3$ , 25 °C):  $\delta$  = 7.48 (dd, 1H,  $J$  = 6.7, 0.9 Hz, ArH), 7.41 (d, 1H,  $J$  = 7.9 Hz, ArH), 7.19 (m, 2H, ArH), 6.52 (s, 1H, ArH), 4.40 (d, 1H,  $J$  = 2.0 Hz, OCH), 4.16(t, 1H,  $J$  = 3.7 Hz, OCH), 3.08 (s, 1H, CH), 1.74 (d, 1H,  $J$  = 10.4 Hz, CHH), 1.63 (m, 1H, CHH), 1.53 (m, 2H, 2CH);  $^{13}\text{C}$  NMR (75 MHz,  $\text{CDCl}_3$ , 25 °C):  $\delta$  = 157.2, 154.5, 128.8, 123.3 (Ar, CH), 122.4 (Ar, CH), 120.5 (Ar, CH), 110.7 (Ar, CH), 103.1 (Ar, CH), 72.6 (OCH), 51.4 (OCH), 43.2 (CH), 33.2 ( $\text{CH}_2$ ), 14.6 (CH), 11.5 (CH); IR ( $\text{CHCl}_3$ ):  $\nu$  = 2934, 1723, 1483, 1060, 797  $\text{cm}^{-1}$ ; HRMS (ES): calcd for  $\text{C}_{14}\text{H}_{13}\text{O}_2$  [ $M + \text{H}$ ] $^+$ : 213.0916; found: 213.0913.

**Cage Adduct 2k.** From 101 mg (0.24 mmol) of the  $\beta$ -lactam-tethered allene **1k**, and after flash chromatography of the residue using hexanes/ethyl acetate (4:1) as eluent gave compound **2k** (20 mg, 32%) as a colorless solid; mp 96–97 °C;  $^1\text{H}$  NMR (300 MHz,  $\text{CDCl}_3$ , 25 °C):  $\delta$  = 6.12 (s, 2H, ArH), 4.30 (br s, 1H, OCH), 3.99 (t, 1H,  $J$  = 3.9 Hz, OCH), 3.79 (s, 9H, 3OMe), 3.01 (s, 1H, CH), 1.62 (d, 1H,  $J$  = 9.5 Hz, CHH), 1.34 (m, 1H, CHH), 1.32 (m, 2H, 2CH);  $^{13}\text{C}$  NMR (75 MHz,

CDCl<sub>3</sub>, 25 °C):  $\delta$  = 160.0, 159.4, 123.3, 119.0, 91.5 (2C, Ar, CH), 74.6 (OCH), 55.9 (2OMe), 55.3 (OMe), 53.2 (OCH), 42.2 (CH), 31.2 (CH<sub>2</sub>), 15.0 (CH), 11.9 (CH); IR (CHCl<sub>3</sub>):  $\nu$  = 2936, 1712, 1476, 1057, 795, 754 cm<sup>-1</sup>; HRMS (ES): calcd for C<sub>15</sub>H<sub>19</sub>O<sub>4</sub>[M + H]<sup>+</sup>: 263.1283; found: 263.1288.

**Cage Adduct 2l.** From 63 mg (0.18 mmol) of the  $\beta$ -lactam-tethered allene **1l**, and after flash chromatography of the residue using hexanes/ethyl acetate (8:1) as eluent gave compound **2l** (13 mg, 37%) as a colorless oil; <sup>1</sup>H NMR (300 MHz, CDCl<sub>3</sub>, 25 °C):  $\delta$  = 7.36 (d, 2H,  $J$  = 8.0 Hz, ArH), 7.30 (d, 2H,  $J$  = 7.1 Hz, ArH), 7.20 (t, 1H,  $J$  = 7.3 Hz, ArH), 6.47 (d, 1H,  $J$  = 16.1 Hz, =CH), 6.09 (d, 1H,  $J$  = 16.1, 8.5 Hz, =CH), 4.07 (m, 1H, OCH), 4.05 (t, 1H,  $J$  = 3.8 Hz, OCH), 2.48 (d, 1H,  $J$  = 8.5 Hz, CH), 1.59 (d, 1H,  $J$  = 10.6 Hz, CHH), 1.44 (m, 1H, CHH), 1.37 (m, 2H, 2CH); <sup>13</sup>C NMR (75 MHz, CDCl<sub>3</sub>, 25 °C):  $\delta$  = 137.4, 130.7 (=CH), 128.8 (=CH), 128.4 (2C, Ar, CH), 127.0 (Ar, CH), 126.1 (Ar, 2CH), 73.9 (OCH), 51.2 (OCH), 47.5 (CH), 32.9 (CH<sub>2</sub>), 15.6 (CH), 11.4 (CH); IR (CHCl<sub>3</sub>):  $\nu$  = 2934, 1710, 1475, 1060, 794 cm<sup>-1</sup>; HRMS (ES): calcd for C<sub>14</sub>H<sub>15</sub>O[M + H]<sup>+</sup>: 199.1123; found: 199.1119.

**Cage Adduct 2m.** From 81 mg (0.22 mmol) of the  $\beta$ -lactam-tethered allene **1m**, and after flash chromatography of the residue using hexanes/ethyl acetate (8:1) as eluent gave compound **2m** (16 mg, 32%) as a colorless oil; <sup>1</sup>H NMR (300 MHz, CDCl<sub>3</sub>, 25 °C):  $\delta$  = 7.29 (d, 2H,  $J$  = 8.8 Hz, ArH), 6.84 (d, 2H,  $J$  = 8.8 Hz, ArH), 6.42 (d, 1H,  $J$  = 16.1 Hz, =CH), 5.94 (d, 1H,  $J$  = 15.9, 8.5 Hz, =CH), 4.05 (m, 1H, OCH), 4.04 (t, 1H,  $J$  = 4.1 Hz, OCH), 3.81 (s, 3H, OMe), 2.45 (d, 1H,  $J$  = 8.5 Hz, CH), 1.57 (d, 1H,  $J$  = 10.4 Hz, CHH), 1.41 (d, 1H,  $J$  = 10.6 Hz, CHH), 1.37 (t, 1H,  $J$  = 4.4 Hz, CH), 1.28 (t, 1H,  $J$  = 4.4 Hz, CH); <sup>13</sup>C NMR (75 MHz, CDCl<sub>3</sub>, 25 °C):  $\delta$  = 158.8, 130.3, 130.0 (=CH), 127.2 (2C, Ar, CH), 126.5 (=CH), 113.9 (2C, Ar, CH), 74.0 (OCH), 55.3 (OMe), 51.2 (OCH), 47.4 (CH), 32.9 (CH<sub>2</sub>), 15.6 (CH), 11.4 (CH); IR (CHCl<sub>3</sub>):  $\nu$  = 2934, 1711, 1479, 1062, 798, 750 cm<sup>-1</sup>; HRMS (ES): calcd for C<sub>15</sub>H<sub>17</sub>O<sub>2</sub>[M + H]<sup>+</sup>: 229.1229; found: 229.1221.

**Cage Adduct 2n.** From 27 mg (0.06 mmol) of the  $\beta$ -lactam-tethered allene **1n**, and after flash chromatography of the residue using hexanes/ethyl acetate (8:1) as eluent gave compound **2n** (12 mg, 68%) as a colorless solid; mp 108–109 °C;  $^1\text{H}$  NMR (300 MHz,  $\text{C}_6\text{D}_6$ , 25 °C):  $\delta$  = 7.72 (dd, 1H,  $J$  = 7.9, 0.9 Hz, ArH), 7.45 (dd, 1H,  $J$  = 8.2, 0.9 Hz, ArH), 7.12 (m, 2H, ArH), 4.00 (d, 1H,  $J$  = 1.6 Hz, OCH), 3.72 (s, 3H, NMe), 3.36 (s, 1H, CH), 1.73 (d, 1H,  $J$  = 10.7 Hz, CHH), 1.66 (s, 3H, Me), 1.55 (dt, 1H,  $J$  = 10.6, 2.0 Hz, CHH), 1.18 (m, 2H, 2CH);  $^{13}\text{C}$  NMR (75 MHz,  $\text{CDCl}_3$ , 25 °C):  $\delta$  = 142.8, 139.5, 132.0 (Ar, CH), 120.0 (Ar, CH), 119.7, 117.2 (Ar, CH), 115.2 (Ar, CH), 112.2, 73.6 (OCH), 58.8, 43.3 (CH), 34.4 ( $\text{CH}_2$ ), 33.3 (NMe), 21.4 (CH), 17.5 (CH), 14.3 (Me); IR ( $\text{CHCl}_3$ ):  $\nu$  = 2925, 1690, 1510, 1342, 751  $\text{cm}^{-1}$ ; HRMS (ES): calcd for  $\text{C}_{16}\text{H}_{17}\text{N}_2\text{O}_3$  [ $M + \text{H}$ ] $^+$ : 285.1239; found: 285.1227.

**Cage Adduct 2o.** From 26 mg (0.08 mmol) of the  $\beta$ -lactam-tethered allene **1o**, and after flash chromatography of the residue using hexanes/ethyl acetate (6:1) as eluent gave compound **2o** (7 mg, 42%) as a colorless oil;  $^1\text{H}$  NMR (300 MHz,  $\text{C}_6\text{D}_6$ , 25 °C):  $\delta$  = 6.20 (d, 1H,  $J$  = 3.0 Hz, ArH), 5.97 (d, 1H,  $J$  = 2.9 Hz, ArH), 4.20 (d, 1H,  $J$  = 1.5 Hz, OCH), 2.92 (s, 1H, CH), 2.20 (d, 3H,  $J$  = 0.4 Hz Me), 1.66 (s, 3H, Me), 1.49 (dt, 1H,  $J$  = 10.5, 1.7 Hz, CHH), 1.33 (d, 1H,  $J$  = 10.3 Hz, CHH), 1.17 (d, 1H,  $J$  = 5.5 Hz, CH), 0.98 (t, 1H,  $J$  = 5.5 Hz, CH);  $^{13}\text{C}$  NMR (75 MHz,  $\text{CDCl}_3$ , 25 °C):  $\delta$  = 152.2, 150.4, 106.7 (Ar, CH), 106.1 (Ar, CH), 74.6 (OCH), 58.6, 44.5 (CH), 34.4 ( $\text{CH}_2$ ), 20.0 (Me), 17.1 (CH), 14.0 (CH), 13.5 (Me); IR ( $\text{CHCl}_3$ ):  $\nu$  = 2928, 1714, 1510, 1250, 921, 795, 757  $\text{cm}^{-1}$ ; HRMS (ES): calcd for  $\text{C}_{12}\text{H}_{15}\text{O}_2$  [ $M + \text{H}$ ] $^+$ : 191.1072; found: 191.1063.

**Bis(Cage)Adduct 2p.** From 47 mg (0.09 mmol) of the bis( $\beta$ -lactam)-tethered bis(allene) **1p**, and after flash chromatography of the residue using hexanes/ethyl acetate (8:1) as eluent gave compound **2p** (8 mg, 36%) as a colorless solid; mp 109–110 °C;  $^1\text{H}$  NMR (300 MHz,  $\text{CDCl}_3$ , 25 °C):  $\delta$  = 6.01 (s, 2H, ArH), 4.25 (s, 2H, 2OCH), 4.07 (t, 2H,  $J$  = 3.8 Hz, 2OCH), 2.89 (s, 2H, 2CH), 1.64 (d, 2H,  $J$  = 10.7 Hz, 2CHH), 1.48 (m, 2H, 2CHH), 1.45 (m, 2H, 2CH), 1.42 (m, 2H, 2CH);  $^{13}\text{C}$

NMR (175 MHz, CDCl<sub>3</sub>, 25 °C):  $\delta$  = 152.4 (2C), 106.7 (Ar, CH), 106.5 (Ar, CH), 72.7 (OCH), 72.6 (OCH), 51.3 (OCH), 51.2 (OCH), 42.8 (2C, CH), 33.0 (CH<sub>2</sub>), 32.9 (CH<sub>2</sub>), 14.6 (CH), 14.4 (CH), 11.4 (CH), 11.3 (CH); IR (CHCl<sub>3</sub>):  $\nu$  = 2930, 1708, 1515, 946, 790 cm<sup>-1</sup>; HRMS (ES): calcd for C<sub>16</sub>H<sub>17</sub>O<sub>3</sub>[*M*+H]<sup>+</sup>: 257.1178; found: 257.1173.

## Computational Details

All the calculations reported in this paper were obtained with the GAUSSIAN 09 suite of programs.<sup>1</sup> Electron correlation was partially taken into account using the hybrid functional usually denoted as B3LYP<sup>2</sup> in conjunction with the D3 dispersion correction suggested by Grimme et al.<sup>3</sup> using the standard double- $\zeta$  quality plus polarization def2-SVP basis set<sup>4</sup> for all atoms. Solvents effects were taken into account by means of the Polarizable Continuum Model (PCM)<sup>5</sup> using dichloroethane as solvent during the geometry optimizations. Reactants and products were characterized by frequency calculations,<sup>6</sup> and have positive definite Hessian matrices. Transition structures (TS's) show only one negative eigenvalue in their diagonalized force constant matrices, and their associated eigenvectors were confirmed to correspond to the motion along the reaction coordinate under consideration using the Intrinsic Reaction Coordinate (IRC) method.<sup>7</sup> Single point calculations were performed to estimate the change in the Gibbs energies at the B3LYP-D3 level using the triple- $\zeta$  quality plus polarization def2-TZVP basis set for all atoms. This level is denoted PCM(dichloroethane)-B3LYP-D3/def2-TZVP//PCM(dichloroethane)-B3LYP-D3/def2-SVP.

---

<sup>1</sup>Gaussian 09, Revision D.01, Frisch, M. J.; Trucks, G. W.; Schlegel, H. B.; Scuseria, G. E.; Robb, M. A.; Cheeseman, J. R.; Scalmani, G.; Barone, V.; Mennucci, B.; Petersson, G. A.; Nakatsuji, H.; Caricato, M.; Li, X.; Hratchian, H. P.; Izmaylov, A. F.; Bloino, J.; Zheng, G.; Sonnenberg, J. L.; Hada, M.; Ehara, M.; Toyota, K.; Fukuda, R.; Hasegawa, J.; Ishida, M.; Nakajima, T.; Honda, Y.; Kitao, O.; Nakai, H.; Vreven, T.; Montgomery, Jr., J. A.; Peralta, J. E.; Ogliaro, F.; Bearpark, M.; Heyd, J. J.; Brothers, E.; Kudin, K. N.; Staroverov, V. N.; Kobayashi, R.; Normand, J.; Raghavachari, K.; Rendell, A.; Burant, J. C.; Iyengar, S. S.; Tomasi, J.; Cossi, M.; Rega, N.; Millam, N. J.; Klene, M.; Knox, J. E.; Cross, J. B.; Bakken, V.; Adamo, C.; Jaramillo, J.; Gomperts, R.; Stratmann, R. E.; Yazyev, O.; Austin, A. J.; Cammi, R.; Pomelli, C.; Ochterski, J. W.; Martin, R. L.; Morokuma, K.; Zakrzewski, V. G.; Voth, G. A.; Salvador, P.; Dannenberg, J. J.; Dapprich, S.; Daniels, A. D.; Farkas, Ö.; Foresman, J. B.; Ortiz, J. V.; Cioslowski, J.; Fox, D. J. Gaussian, Inc., Wallingford CT, 2009.

<sup>2</sup>(a) Becke, A. D. *J. Chem. Phys.* **1993**, *98*, 5648. (b) Lee, C.; Yang, W.; Parr, R. G. *Phys. Rev. B* **1998**, *37*, 785. (c) Vosko, S. H.; Wilk, L.; Nusair, M. *Can. J. Phys.* **1980**, *58*, 1200.

<sup>3</sup>Grimme, S.; Antony, J.; Ehrlich, S.; Krieg, H. *J. Chem. Phys.* **2010**, *132*, 154104.

<sup>4</sup>Weigend, F.; Ahlrichs, R. *Phys. Chem. Chem. Phys.* **2005**, *7*, 3297.

<sup>5</sup>(a) Miertuš, S.; Scrocco, E.; Tomasi, J. *Chem. Phys.* **1981**, *55*, 117. (b) Pascual-Ahuir, J. L.; Silla, E.; Tuñón, I. *J. Comp. Chem.* **1994**, *15*, 1127. (c) Barone, V.; Cossi, M. *J. Phys. Chem. A*, **1998**, *102*, 1995.

<sup>6</sup>McIver, J. W.; Komornicki, A. K. *J. Am. Chem. Soc.* **1972**, *94*, 2625.

<sup>7</sup>González, C.; Schlegel, H. B. *J. Phys. Chem.* **1990**, *94*, 5523.

Cartesian coordinates (in Å) and total energies (in a. u., ZPVE included) of all the stationary points discussed in the text. All calculations have been performed at the PCM(dichloroethane)-B3LYP-D3/def2-SVP level.

**1M:** E=-536.864916

|   |              |              |              |
|---|--------------|--------------|--------------|
| O | -1.859969000 | -1.423086000 | -0.337128000 |
| C | 1.249621000  | -0.460619000 | 0.496608000  |
| C | 2.347785000  | 0.106670000  | 1.109666000  |
| C | 3.116464000  | 0.742013000  | 0.082678000  |
| C | 0.179904000  | -1.237173000 | 1.090099000  |
| C | -1.516314000 | 0.916650000  | -1.030218000 |
| C | -1.525575000 | -0.548100000 | -1.404726000 |
| C | -2.377933000 | 1.909126000  | 1.236392000  |
| C | -1.073713000 | -1.617647000 | 0.740171000  |
| H | 4.047043000  | 1.294533000  | 0.197121000  |
| H | 2.564429000  | 0.074226000  | 2.175462000  |
| H | -1.101954000 | 1.587177000  | -1.794618000 |
| H | 0.446107000  | -1.577935000 | 2.094851000  |
| H | -1.623599000 | -2.229056000 | 1.462127000  |
| H | -1.698943000 | 2.015955000  | 2.090860000  |
| H | -3.417631000 | 2.227037000  | 1.378677000  |
| H | -0.554047000 | -0.819568000 | -1.842469000 |
| O | 1.321905000  | -0.214525000 | -0.845600000 |
| C | 2.445646000  | 0.515595000  | -1.085268000 |
| H | 2.628391000  | 0.787739000  | -2.121683000 |
| C | -1.960011000 | 1.418118000  | 0.096163000  |
| H | -2.300529000 | -0.727017000 | -2.167895000 |

**3M:** E=-977.058029

|    |              |              |              |
|----|--------------|--------------|--------------|
| O  | -4.150417000 | -1.694068000 | 0.614656000  |
| C  | -3.249649000 | 1.303545000  | -0.540645000 |
| C  | -2.513397000 | 2.196729000  | -1.288188000 |
| C  | -1.843221000 | 3.060033000  | -0.361825000 |
| C  | -4.107755000 | 0.219221000  | -0.985923000 |
| C  | -1.913082000 | -0.971093000 | 1.359585000  |
| C  | -3.375350000 | -1.175566000 | 1.678070000  |
| C  | -1.069286000 | -1.715147000 | -1.032429000 |
| C  | -4.456498000 | -0.996677000 | -0.501956000 |
| H  | -1.175255000 | 3.887398000  | -0.592802000 |
| H  | -2.455793000 | 2.218344000  | -2.374367000 |
| H  | -1.329009000 | -0.460512000 | 2.131965000  |
| H  | -4.518138000 | 0.399709000  | -1.983681000 |
| H  | -5.113739000 | -1.613527000 | -1.121428000 |
| H  | -1.350201000 | -1.079811000 | -1.882173000 |
| H  | -0.785027000 | -2.751688000 | -1.251459000 |
| H  | -3.784636000 | -0.215618000 | 2.031671000  |
| O  | -3.077880000 | 1.591936000  | 0.784967000  |
| C  | -2.221392000 | 2.644742000  | 0.883695000  |
| H  | -1.992801000 | 2.985436000  | 1.890209000  |
| C  | -1.349616000 | -1.321725000 | 0.227331000  |
| Au | 0.775589000  | -0.679153000 | -0.213461000 |
| C  | 2.597121000  | 0.221792000  | 0.075671000  |
| C  | 4.805294000  | 0.559810000  | 0.322163000  |
| C  | 4.194706000  | 1.778572000  | 0.349437000  |



|   |              |              |              |
|---|--------------|--------------|--------------|
| H | 5.853200000  | 0.286151000  | 0.408231000  |
| H | 4.605155000  | 2.777342000  | 0.469538000  |
| N | 3.808817000  | -0.381666000 | 0.158341000  |
| N | 2.841181000  | 1.550808000  | 0.197125000  |
| H | -3.469444000 | -1.907735000 | 2.495678000  |
| C | 4.057850000  | -1.815437000 | 0.042330000  |
| H | 3.127793000  | -2.360574000 | 0.240906000  |
| H | 4.414808000  | -2.057883000 | -0.968963000 |
| H | 4.815925000  | -2.112969000 | 0.778480000  |
| C | 1.843132000  | 2.616506000  | 0.173045000  |
| H | 1.991122000  | 3.247224000  | -0.714869000 |
| H | 0.838305000  | 2.180195000  | 0.141691000  |
| H | 1.939491000  | 3.232818000  | 1.077353000  |

**4M:** E=-977.082055

|    |              |              |              |
|----|--------------|--------------|--------------|
| O  | -2.972178000 | -1.117129000 | 1.447880000  |
| C  | -4.309663000 | 0.823162000  | -0.383575000 |
| C  | -5.024765000 | 1.780141000  | -1.070327000 |
| C  | -4.459702000 | 3.046047000  | -0.717046000 |
| C  | -4.408136000 | -0.616971000 | -0.387586000 |
| C  | -0.975650000 | -2.442925000 | 1.095640000  |
| C  | -1.951219000 | -1.909145000 | 1.861609000  |
| C  | -1.073883000 | -1.132755000 | -1.101046000 |
| C  | -3.759119000 | -1.500418000 | 0.393042000  |
| H  | -4.770535000 | 4.029737000  | -1.062979000 |
| H  | -5.856779000 | 1.588331000  | -1.744700000 |
| H  | -0.283263000 | -3.110638000 | 1.614615000  |
| H  | -5.089444000 | -1.036252000 | -1.130502000 |
| H  | -3.847557000 | -2.581998000 | 0.252234000  |
| H  | -1.711394000 | -0.336203000 | -0.713765000 |
| H  | -0.947651000 | -1.180670000 | -2.186332000 |
| O  | -3.337297000 | 1.436583000  | 0.360615000  |
| C  | -3.439022000 | 2.775001000  | 0.151358000  |
| H  | -2.725650000 | 3.399679000  | 0.683372000  |
| C  | -0.687565000 | -2.208747000 | -0.321783000 |
| Au | 0.983719000  | -0.527355000 | -0.339368000 |
| C  | 2.687409000  | 0.509389000  | 0.111773000  |
| C  | 4.746437000  | 1.406824000  | 0.028853000  |
| C  | 4.169113000  | 1.804056000  | 1.198568000  |
| H  | 5.724778000  | 1.624417000  | -0.390569000 |
| H  | 4.548878000  | 2.428561000  | 2.002417000  |
| N  | 3.822918000  | 0.612514000  | -0.622461000 |
| N  | 2.905746000  | 1.247778000  | 1.228901000  |
| H  | -1.967201000 | -2.076419000 | 2.943330000  |
| H  | -0.166583000 | -3.032543000 | -0.824232000 |
| C  | 4.048411000  | 0.027367000  | -1.940909000 |
| H  | 5.035616000  | -0.452827000 | -1.963744000 |
| H  | 3.275721000  | -0.723694000 | -2.140698000 |
| H  | 4.004676000  | 0.809337000  | -2.712580000 |
| C  | 1.974198000  | 1.383538000  | 2.346138000  |
| H  | 0.945540000  | 1.411447000  | 1.966312000  |
| H  | 2.083623000  | 0.536724000  | 3.038780000  |
| H  | 2.187471000  | 2.318988000  | 2.877804000  |

**TS1:** E=-977.051064

|   |              |              |              |
|---|--------------|--------------|--------------|
| O | -3.228169000 | -1.287040000 | 1.219232000  |
| C | -4.613611000 | 0.517969000  | -0.687135000 |
| C | -5.391855000 | 1.349426000  | -1.497042000 |
| C | -5.668598000 | 2.509363000  | -0.743867000 |

|    |              |              |              |
|----|--------------|--------------|--------------|
| C  | -4.077702000 | -0.752317000 | -0.946370000 |
| C  | -0.951849000 | -2.060641000 | 1.379524000  |
| C  | -2.159834000 | -1.806135000 | 1.916956000  |
| C  | -1.527045000 | -0.808770000 | -0.682576000 |
| C  | -3.227657000 | -1.516877000 | -0.139658000 |
| H  | -6.250545000 | 3.377497000  | -1.044207000 |
| H  | -5.712158000 | 1.119552000  | -2.511308000 |
| H  | -0.210322000 | -2.549846000 | 2.015018000  |
| H  | -4.267264000 | -1.142356000 | -1.949175000 |
| H  | -3.090332000 | -2.567902000 | -0.426038000 |
| H  | -1.698996000 | 0.163813000  | -0.210713000 |
| H  | -1.487805000 | -0.761316000 | -1.774747000 |
| O  | -4.409506000 | 1.145333000  | 0.519044000  |
| C  | -5.039439000 | 2.325838000  | 0.471222000  |
| H  | -4.966133000 | 2.949932000  | 1.359818000  |
| C  | -0.602451000 | -1.720653000 | -0.022649000 |
| Au | 1.201413000  | -0.503189000 | -0.065357000 |
| C  | 2.955716000  | 0.583979000  | -0.035223000 |
| C  | 4.510603000  | 2.139365000  | 0.465186000  |
| C  | 5.057381000  | 1.290492000  | -0.448258000 |
| H  | 4.922367000  | 3.014200000  | 0.960887000  |
| H  | 6.041278000  | 1.277384000  | -0.908963000 |
| N  | 3.224689000  | 1.690053000  | 0.706301000  |
| N  | 4.091180000  | 0.344594000  | -0.741028000 |
| H  | -2.420302000 | -1.999398000 | 2.959296000  |
| H  | -0.335417000 | -2.602892000 | -0.626596000 |
| C  | 4.293602000  | -0.742042000 | -1.692502000 |
| H  | 4.450061000  | -0.334774000 | -2.701676000 |
| H  | 5.171650000  | -1.334931000 | -1.400119000 |
| H  | 3.406632000  | -1.385990000 | -1.695122000 |
| C  | 2.309185000  | 2.341829000  | 1.635816000  |
| H  | 2.111032000  | 3.371971000  | 1.307065000  |
| H  | 1.366763000  | 1.782804000  | 1.663375000  |
| H  | 2.749525000  | 2.360391000  | 2.642721000  |

**5M:** E=-977.054545

|    |              |              |              |
|----|--------------|--------------|--------------|
| O  | -3.156526000 | -1.118862000 | 1.246733000  |
| C  | -4.704680000 | 0.447081000  | -0.671552000 |
| C  | -5.698307000 | 1.142176000  | -1.403790000 |
| C  | -5.922101000 | 2.350022000  | -0.744071000 |
| C  | -4.140770000 | -0.786165000 | -0.894434000 |
| C  | -0.923503000 | -1.970441000 | 1.440775000  |
| C  | -2.116279000 | -1.639932000 | 1.976852000  |
| C  | -1.662328000 | -0.918369000 | -0.691781000 |
| C  | -3.077858000 | -1.428269000 | -0.135245000 |
| H  | -6.616325000 | 3.143672000  | -1.009385000 |
| H  | -6.180422000 | 0.770844000  | -2.306338000 |
| H  | -0.197086000 | -2.468773000 | 2.087592000  |
| H  | -4.468216000 | -1.289870000 | -1.807923000 |
| H  | -3.103043000 | -2.522739000 | -0.289096000 |
| H  | -1.663913000 | 0.154130000  | -0.447601000 |
| H  | -1.603157000 | -1.026236000 | -1.783380000 |
| O  | -4.336411000 | 1.236398000  | 0.404177000  |
| C  | -5.054504000 | 2.347200000  | 0.346343000  |
| H  | -4.874409000 | 3.085796000  | 1.126846000  |
| C  | -0.568779000 | -1.691144000 | 0.025236000  |
| Au | 1.231947000  | -0.524031000 | -0.038341000 |
| C  | 2.982961000  | 0.592690000  | -0.063491000 |
| C  | 4.520451000  | 2.191296000  | 0.363867000  |
| C  | 5.069120000  | 1.322380000  | -0.529033000 |

|   |              |              |              |
|---|--------------|--------------|--------------|
| H | 4.924026000  | 3.088479000  | 0.825268000  |
| H | 6.047080000  | 1.310437000  | -1.002432000 |
| N | 3.245342000  | 1.727898000  | 0.636722000  |
| N | 4.114154000  | 0.351821000  | -0.777183000 |
| H | -2.385337000 | -1.786689000 | 3.025462000  |
| H | -0.313711000 | -2.627523000 | -0.502900000 |
| C | 4.321183000  | -0.762099000 | -1.694693000 |
| H | 4.468658000  | -0.386415000 | -2.717595000 |
| H | 5.205867000  | -1.339006000 | -1.389843000 |
| H | 3.439252000  | -1.412628000 | -1.671188000 |
| C | 2.330846000  | 2.392144000  | 1.557500000  |
| H | 2.110293000  | 3.408681000  | 1.201201000  |
| H | 1.398979000  | 1.817449000  | 1.612887000  |
| H | 2.781937000  | 2.449090000  | 2.558414000  |

**TS2:** E=-977.036077

|    |              |              |              |
|----|--------------|--------------|--------------|
| O  | 3.621177000  | -1.890083000 | 0.152639000  |
| C  | 3.372272000  | 1.083521000  | 0.171907000  |
| C  | 3.238452000  | 2.430439000  | -0.180262000 |
| C  | 4.541357000  | 2.932482000  | -0.371253000 |
| C  | 2.406363000  | 0.100987000  | 0.421626000  |
| C  | 1.720909000  | -1.411800000 | -1.145094000 |
| C  | 3.053212000  | -1.786356000 | -1.039230000 |
| C  | 1.442668000  | -2.059421000 | 1.215177000  |
| C  | 2.725567000  | -1.237766000 | 1.093572000  |
| H  | 4.834698000  | 3.942723000  | -0.646704000 |
| H  | 2.294150000  | 2.962142000  | -0.280239000 |
| H  | 1.381719000  | -1.116216000 | -2.141319000 |
| H  | 1.391937000  | 0.493752000  | 0.525338000  |
| H  | 3.288675000  | -1.125502000 | 2.030582000  |
| H  | 0.868933000  | -1.737885000 | 2.096313000  |
| H  | 1.740619000  | -3.106220000 | 1.386831000  |
| H  | 3.734795000  | -1.956518000 | -1.879833000 |
| O  | 4.710126000  | 0.766868000  | 0.199597000  |
| C  | 5.392734000  | 1.871806000  | -0.125571000 |
| H  | 6.477690000  | 1.786208000  | -0.138391000 |
| C  | 0.682718000  | -1.861117000 | -0.126583000 |
| H  | 0.324103000  | -2.840143000 | -0.492326000 |
| Au | -1.041377000 | -0.622733000 | -0.068953000 |
| C  | -2.730416000 | 0.593736000  | 0.002838000  |
| C  | -4.867335000 | 1.327767000  | 0.052893000  |
| C  | -4.057318000 | 2.417380000  | 0.156379000  |
| H  | -5.950587000 | 1.245005000  | 0.031960000  |
| H  | -4.293621000 | 3.473910000  | 0.248829000  |
| N  | -4.037225000 | 0.223853000  | -0.039036000 |
| N  | -2.755774000 | 1.948323000  | 0.120620000  |
| C  | -1.579167000 | 2.799988000  | 0.248862000  |
| H  | -0.731214000 | 2.327366000  | -0.261870000 |
| H  | -1.782135000 | 3.774860000  | -0.213481000 |
| H  | -1.324610000 | 2.948071000  | 1.308774000  |
| C  | -4.530093000 | -1.140435000 | -0.184427000 |
| H  | -5.053553000 | -1.253771000 | -1.144972000 |
| H  | -3.680295000 | -1.831916000 | -0.151365000 |
| H  | -5.223483000 | -1.376771000 | 0.635154000  |

**6M:** E=-977.078097

|   |             |              |              |
|---|-------------|--------------|--------------|
| O | 3.401371000 | -2.069367000 | -0.110153000 |
| C | 3.706472000 | 0.922189000  | 0.376505000  |

|    |              |              |              |
|----|--------------|--------------|--------------|
| C  | 4.075171000  | 2.079713000  | 1.005696000  |
| C  | 5.330805000  | 2.472089000  | 0.429075000  |
| C  | 2.531028000  | 0.025430000  | 0.524988000  |
| C  | 1.904178000  | -0.487040000 | -0.790833000 |
| C  | 2.794874000  | -1.573474000 | -1.138243000 |
| C  | 1.371833000  | -2.022019000 | 1.075047000  |
| C  | 2.777904000  | -1.403211000 | 1.059729000  |
| H  | 5.928066000  | 3.346476000  | 0.678939000  |
| H  | 3.515899000  | 2.588362000  | 1.788068000  |
| H  | 1.607729000  | 0.216973000  | -1.569694000 |
| H  | 1.779032000  | 0.529401000  | 1.146081000  |
| H  | 3.432637000  | -1.545243000 | 1.923912000  |
| H  | 0.836520000  | -1.639066000 | 1.955151000  |
| H  | 1.419415000  | -3.117371000 | 1.150983000  |
| H  | 2.933691000  | -2.071536000 | -2.102049000 |
| O  | 4.649952000  | 0.581164000  | -0.549561000 |
| C  | 5.628809000  | 1.526456000  | -0.509021000 |
| H  | 6.456603000  | 1.391188000  | -1.200504000 |
| C  | 0.777078000  | -1.519004000 | -0.263857000 |
| H  | 0.611061000  | -2.341367000 | -0.981622000 |
| Au | -1.078253000 | -0.472576000 | -0.152612000 |
| C  | -2.877918000 | 0.526728000  | -0.001038000 |
| C  | -4.432048000 | 2.162751000  | 0.039320000  |
| C  | -5.066418000 | 0.986763000  | 0.300681000  |
| H  | -4.813086000 | 3.177900000  | -0.029270000 |
| H  | -6.112241000 | 0.769959000  | 0.500220000  |
| N  | -3.094242000 | 1.860724000  | -0.144069000 |
| N  | -4.098723000 | -0.001769000 | 0.273864000  |
| C  | -2.073061000 | 2.866977000  | -0.410706000 |
| H  | -1.904193000 | 3.483587000  | 0.484196000  |
| H  | -1.137880000 | 2.365882000  | -0.685980000 |
| H  | -2.396207000 | 3.511731000  | -1.239497000 |
| C  | -4.390171000 | -1.416690000 | 0.473801000  |
| H  | -4.926271000 | -1.821319000 | -0.397149000 |
| H  | -3.449071000 | -1.963083000 | 0.605175000  |
| H  | -5.010761000 | -1.541941000 | 1.371652000  |

**TS3:** E=-977.073870

|   |             |              |              |
|---|-------------|--------------|--------------|
| O | 3.285196000 | -2.069688000 | -0.105068000 |
| C | 3.756841000 | 0.886657000  | 0.366517000  |
| C | 4.236239000 | 1.996428000  | 1.008744000  |
| C | 5.467711000 | 2.342130000  | 0.355712000  |
| C | 2.543580000 | 0.052701000  | 0.580512000  |
| C | 1.825067000 | -0.359275000 | -0.712260000 |
| C | 2.428095000 | -1.622559000 | -1.055754000 |
| C | 1.343947000 | -1.978486000 | 1.146309000  |
| C | 2.769623000 | -1.406709000 | 1.071624000  |
| H | 6.132342000 | 3.170366000  | 0.592724000  |
| H | 3.764635000 | 2.503627000  | 1.847947000  |
| H | 1.501618000 | 0.370606000  | -1.453237000 |
| H | 1.872880000 | 0.585396000  | 1.267995000  |
| H | 3.443682000 | -1.558618000 | 1.919688000  |
| H | 0.780181000 | -1.530970000 | 1.975431000  |
| H | 1.354387000 | -3.070799000 | 1.263167000  |
| H | 2.458386000 | -2.108029000 | -2.030301000 |
| O | 4.608886000 | 0.532713000  | -0.637972000 |
| C | 5.640384000 | 1.419356000  | -0.635726000 |
| H | 6.407610000 | 1.266106000  | -1.390568000 |
| C | 0.864337000 | -1.543009000 | -0.245201000 |
| H | 0.371026000 | -2.239416000 | -0.937864000 |

|    |              |              |              |
|----|--------------|--------------|--------------|
| Au | -1.075986000 | -0.448535000 | -0.165562000 |
| C  | -2.848002000 | 0.532309000  | 0.007740000  |
| C  | -4.403027000 | 2.157497000  | 0.093932000  |
| C  | -5.035920000 | 0.970036000  | 0.303442000  |
| H  | -4.786405000 | 3.173494000  | 0.063275000  |
| H  | -6.082353000 | 0.743015000  | 0.487404000  |
| N  | -3.062217000 | 1.869312000  | -0.085780000 |
| N  | -4.066031000 | -0.014276000 | 0.250824000  |
| C  | -2.045780000 | 2.892160000  | -0.308806000 |
| H  | -1.083281000 | 2.407635000  | -0.509009000 |
| H  | -2.327470000 | 3.511575000  | -1.171458000 |
| H  | -1.952936000 | 3.529516000  | 0.582089000  |
| C  | -4.349928000 | -1.440369000 | 0.376871000  |
| H  | -4.667909000 | -1.854098000 | -0.591243000 |
| H  | -3.447629000 | -1.962664000 | 0.716048000  |
| H  | -5.149784000 | -1.585094000 | 1.114376000  |

**7M:** E=-977.076434

|    |              |              |              |
|----|--------------|--------------|--------------|
| O  | 3.524071000  | -1.759896000 | -0.574975000 |
| C  | 3.161327000  | 0.874410000  | 0.699413000  |
| C  | 3.529133000  | 1.751124000  | 1.685296000  |
| C  | 4.482253000  | 2.649056000  | 1.096019000  |
| C  | 2.230106000  | -0.286433000 | 0.691152000  |
| C  | 1.495788000  | -0.488802000 | -0.644884000 |
| C  | 2.422584000  | -1.503697000 | -1.393470000 |
| C  | 1.684284000  | -2.650091000 | 0.533645000  |
| C  | 2.886516000  | -1.701386000 | 0.707581000  |
| H  | 4.994390000  | 3.479856000  | 1.577212000  |
| H  | 3.160949000  | 1.752595000  | 2.709228000  |
| H  | 1.201558000  | 0.337853000  | -1.310049000 |
| H  | 1.556632000  | -0.188063000 | 1.554118000  |
| H  | 3.602697000  | -1.907574000 | 1.508821000  |
| H  | 0.950712000  | -2.582494000 | 1.347998000  |
| H  | 2.004811000  | -3.694396000 | 0.405083000  |
| H  | 2.623746000  | -1.403035000 | -2.459047000 |
| O  | 3.819574000  | 1.181267000  | -0.454651000 |
| C  | 4.616194000  | 2.254501000  | -0.204529000 |
| H  | 5.207364000  | 2.619793000  | -1.040612000 |
| C  | 1.202666000  | -2.061293000 | -0.786910000 |
| H  | 0.381313000  | -2.477577000 | -1.370289000 |
| Au | -0.794264000 | -0.131412000 | -0.320209000 |
| C  | -2.713841000 | 0.306332000  | 0.099943000  |
| C  | -4.717714000 | 1.313291000  | 0.213909000  |
| C  | -4.786199000 | 0.171830000  | 0.955130000  |
| H  | -5.464231000 | 2.075897000  | 0.010706000  |
| H  | -5.603723000 | -0.254402000 | 1.529756000  |
| N  | -3.436231000 | 1.379897000  | -0.301819000 |
| N  | -3.546739000 | -0.433867000 | 0.871832000  |
| C  | -2.972482000 | 2.453151000  | -1.175942000 |
| H  | -1.892272000 | 2.350552000  | -1.329906000 |
| H  | -3.486593000 | 2.396010000  | -2.145815000 |
| H  | -3.182077000 | 3.424684000  | -0.708272000 |
| C  | -3.174570000 | -1.676592000 | 1.544124000  |
| H  | -4.069979000 | -2.118300000 | 1.996736000  |
| H  | -2.750984000 | -2.381319000 | 0.816610000  |
| H  | -2.432078000 | -1.474134000 | 2.328293000  |

**2M:** E=-536.906367

|   |              |              |              |
|---|--------------|--------------|--------------|
| O | -1.238330000 | -0.725857000 | 1.187360000  |
| C | 1.143306000  | 0.405616000  | -0.212086000 |
| C | 2.264451000  | 1.194005000  | -0.188041000 |
| C | 3.376276000  | 0.318736000  | 0.058066000  |
| C | -0.298320000 | 0.724248000  | -0.401851000 |
| C | -1.112450000 | -0.328266000 | -1.156192000 |
| C | -1.672617000 | -1.216366000 | -0.067840000 |
| C | -2.593929000 | 0.956599000  | 0.316732000  |
| C | -1.187966000 | 0.672534000  | 0.883323000  |
| H | 4.427227000  | 0.588886000  | 0.141889000  |
| H | 2.288467000  | 2.272448000  | -0.331603000 |
| H | -0.826587000 | -0.703963000 | -2.139318000 |
| H | -0.367499000 | 1.721269000  | -0.862432000 |
| H | -0.844628000 | 1.244943000  | 1.752180000  |
| H | -2.677492000 | 1.959214000  | -0.128705000 |
| H | -3.376935000 | 0.825844000  | 1.079321000  |
| H | -1.797259000 | -2.297325000 | -0.130536000 |
| O | 1.499240000  | -0.894035000 | -0.000870000 |
| C | 2.848506000  | -0.936523000 | 0.161892000  |
| H | 3.281469000  | -1.918399000 | 0.337147000  |
| C | -2.564770000 | -0.174541000 | -0.704525000 |
| H | -3.408969000 | -0.430031000 | -1.346728000 |

Q09SC495P

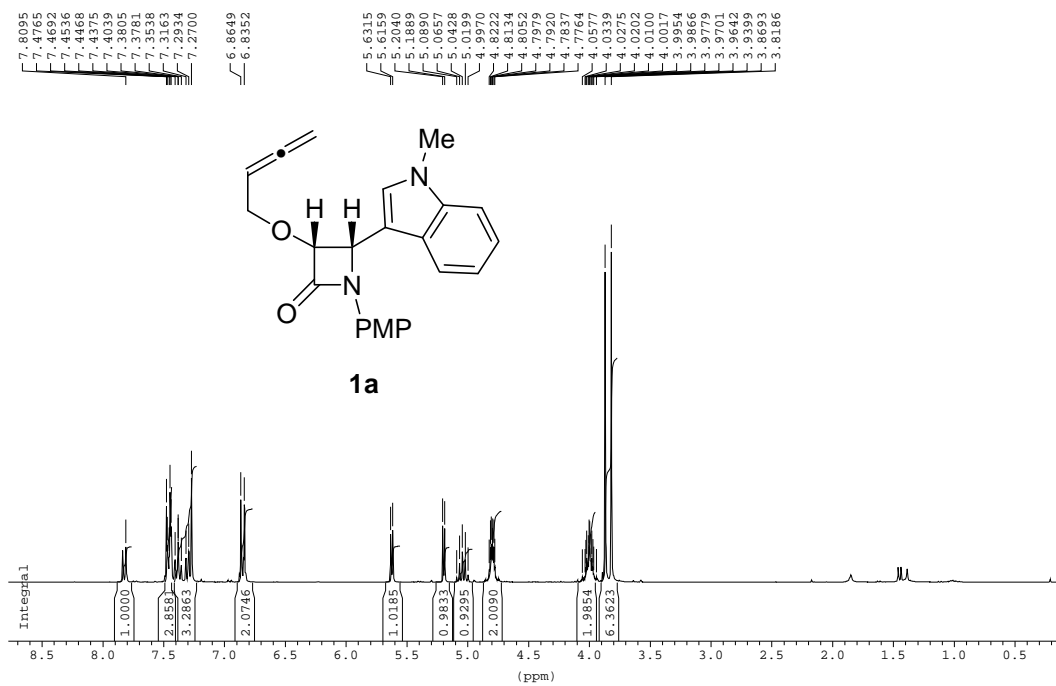

Q09SC495P

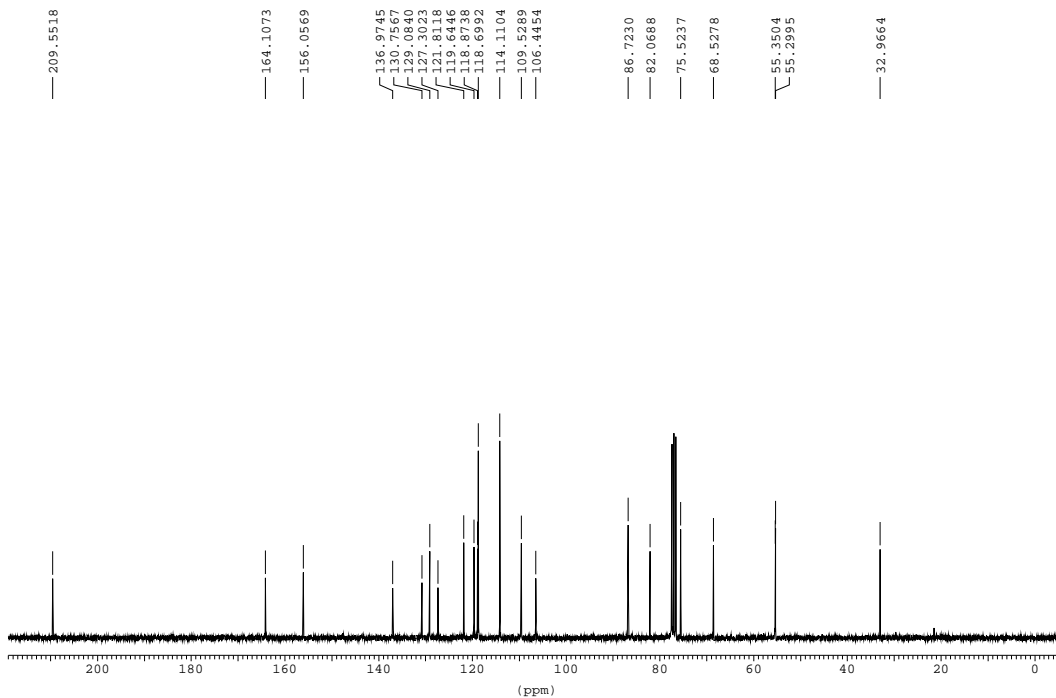

Q09SC655P

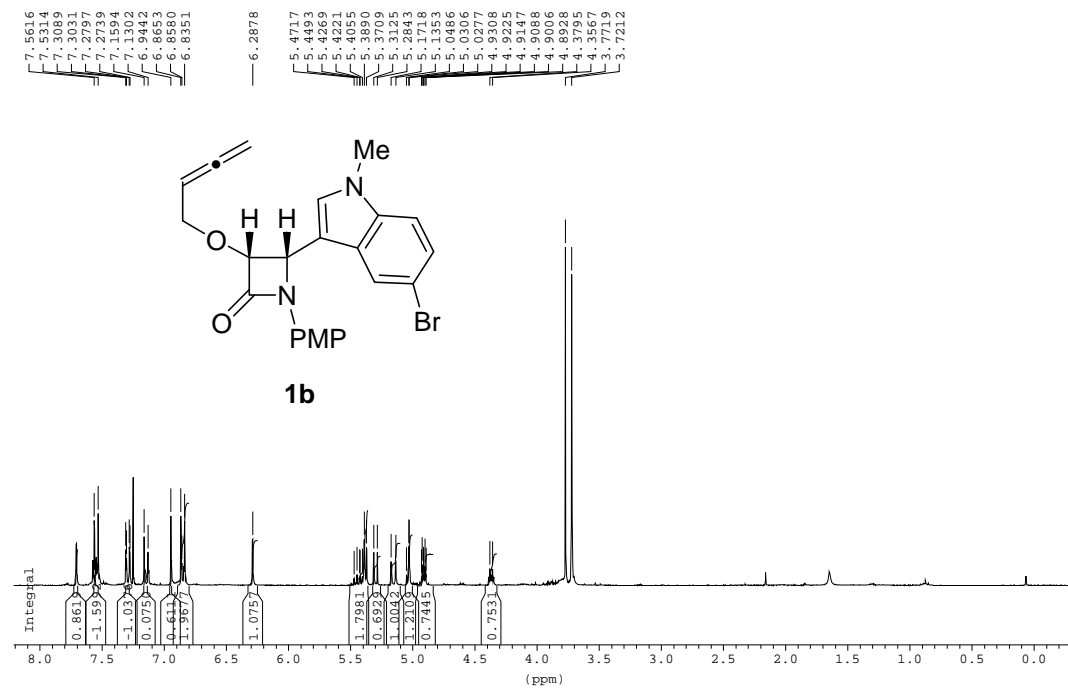

Q09SC655P

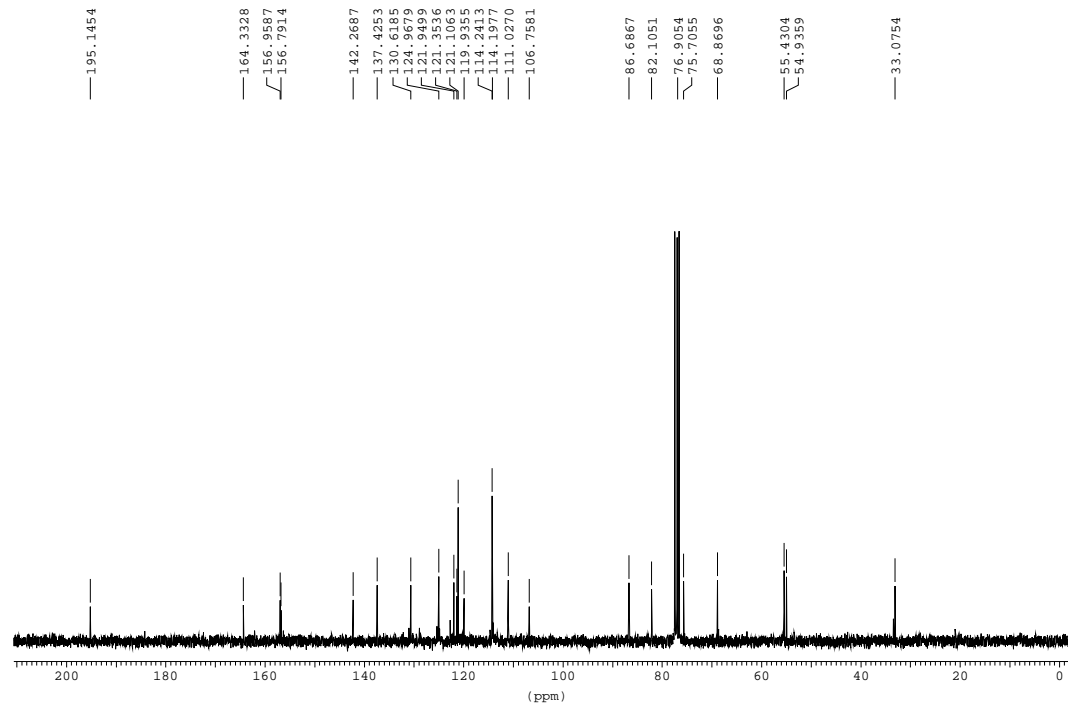



Q09SC718P

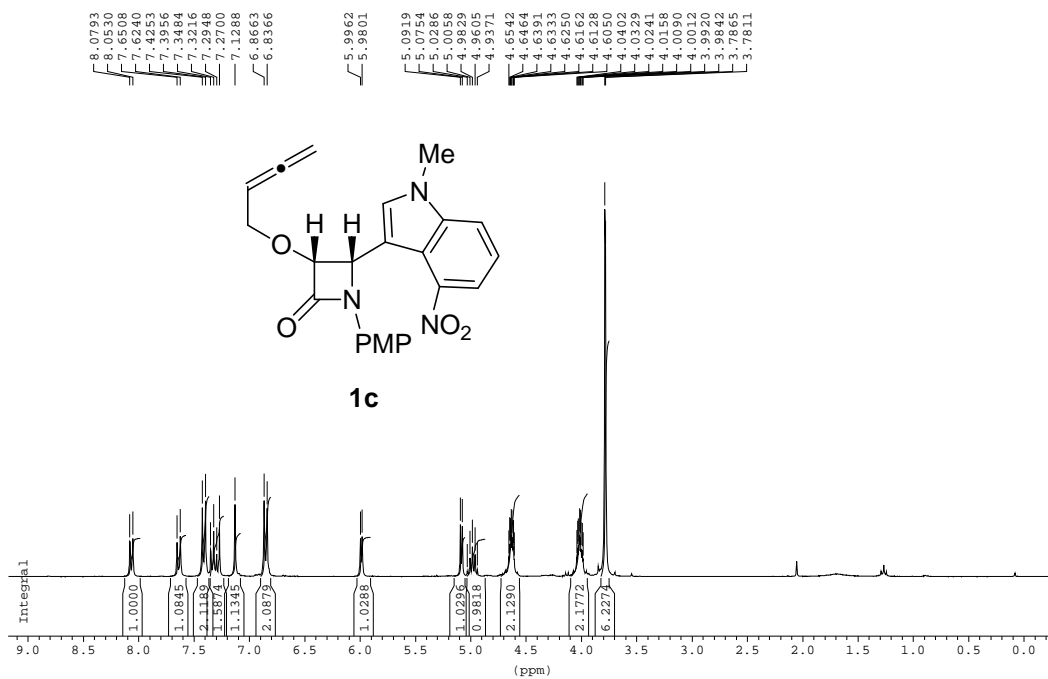

Q09SC718P

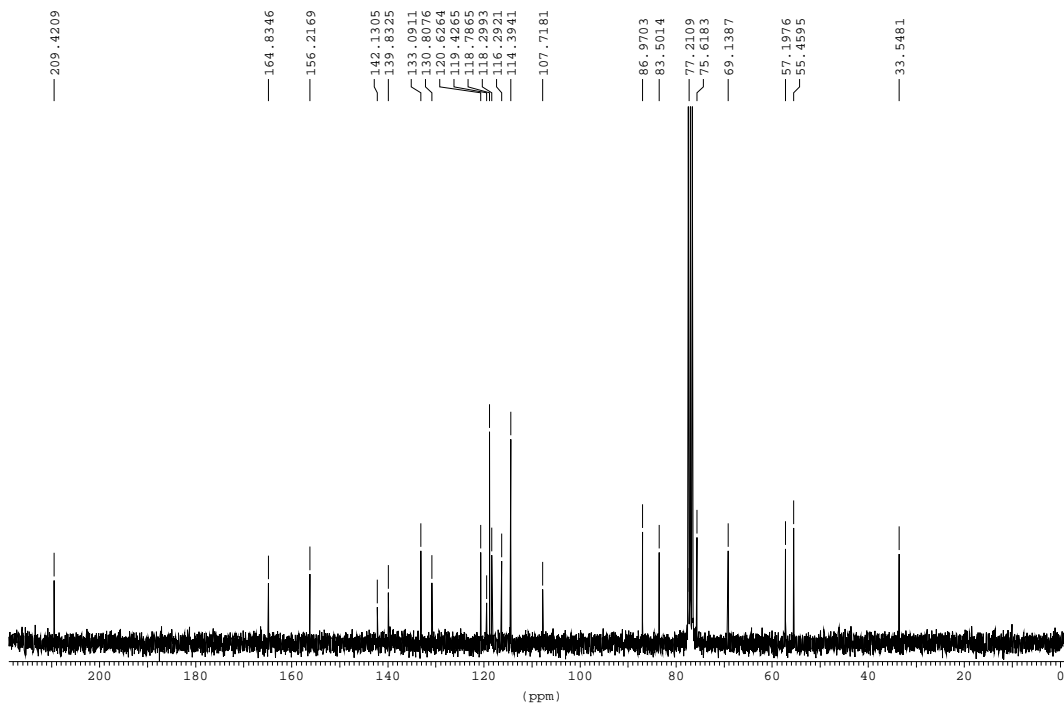

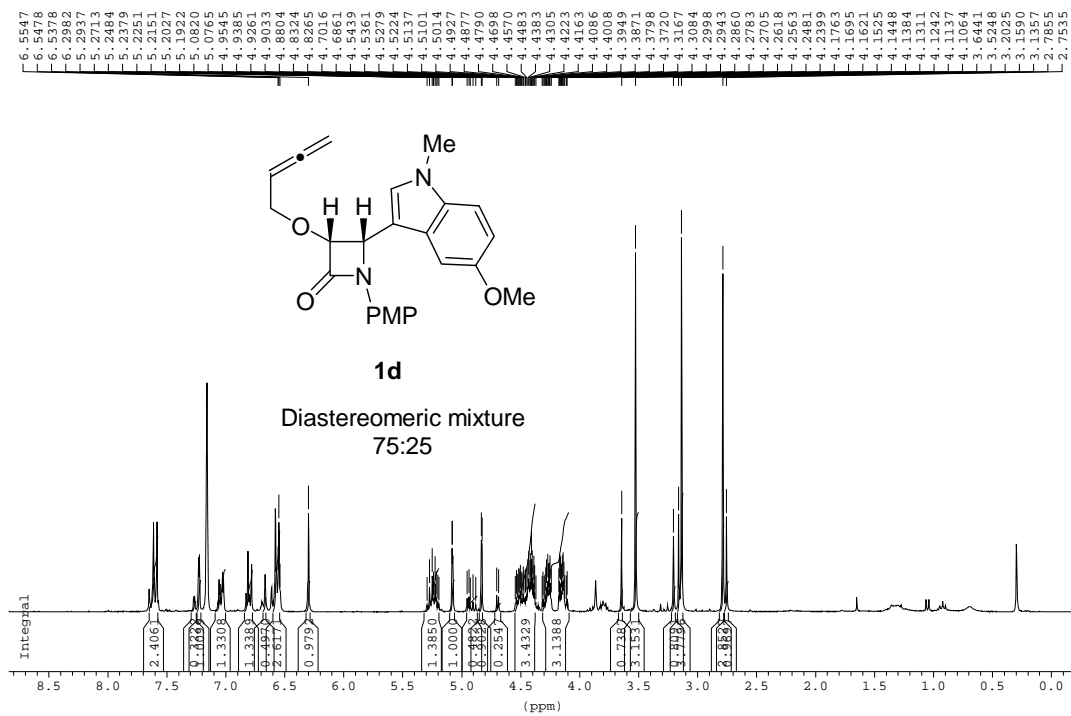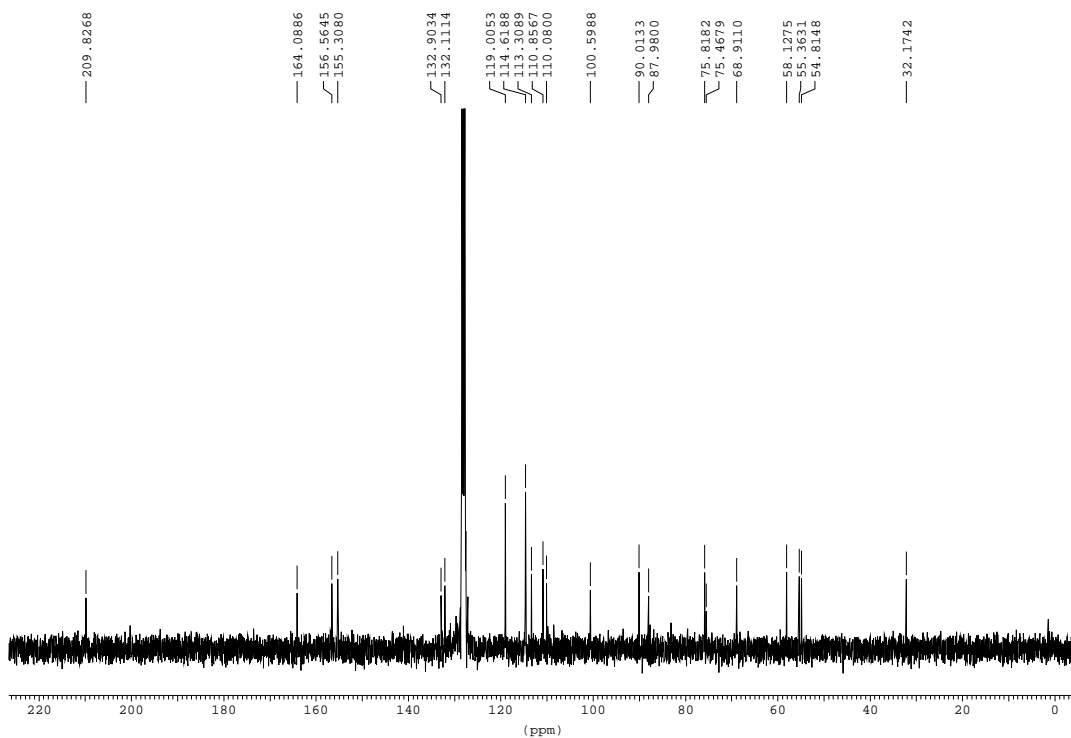

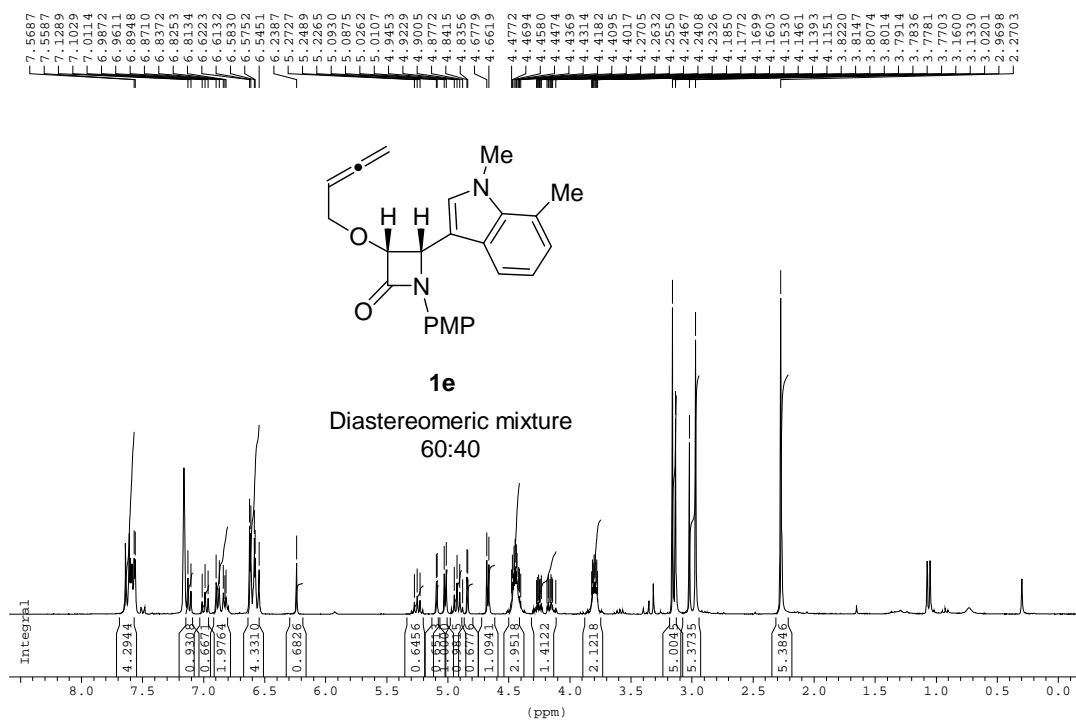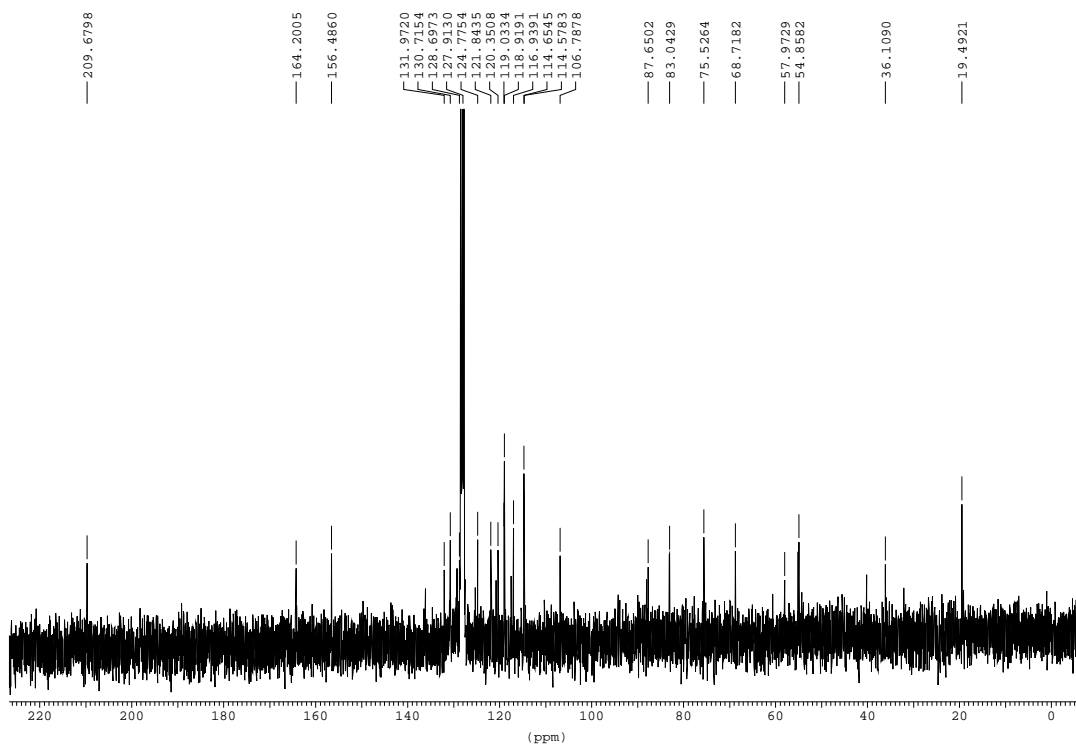

Q09SC1758A

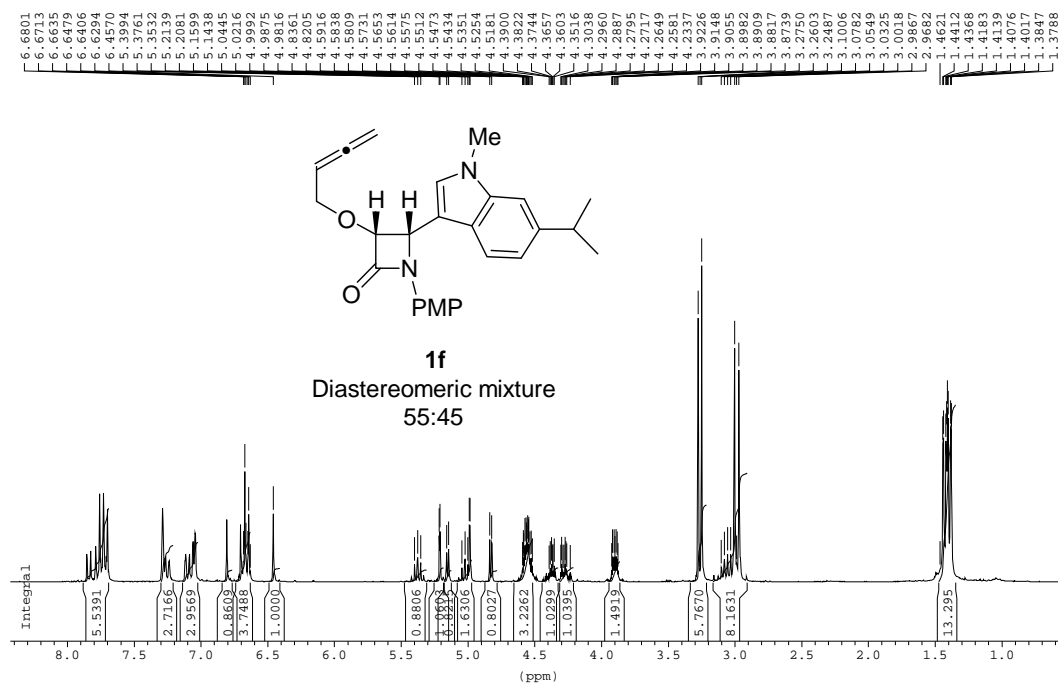

Q09SC1758A

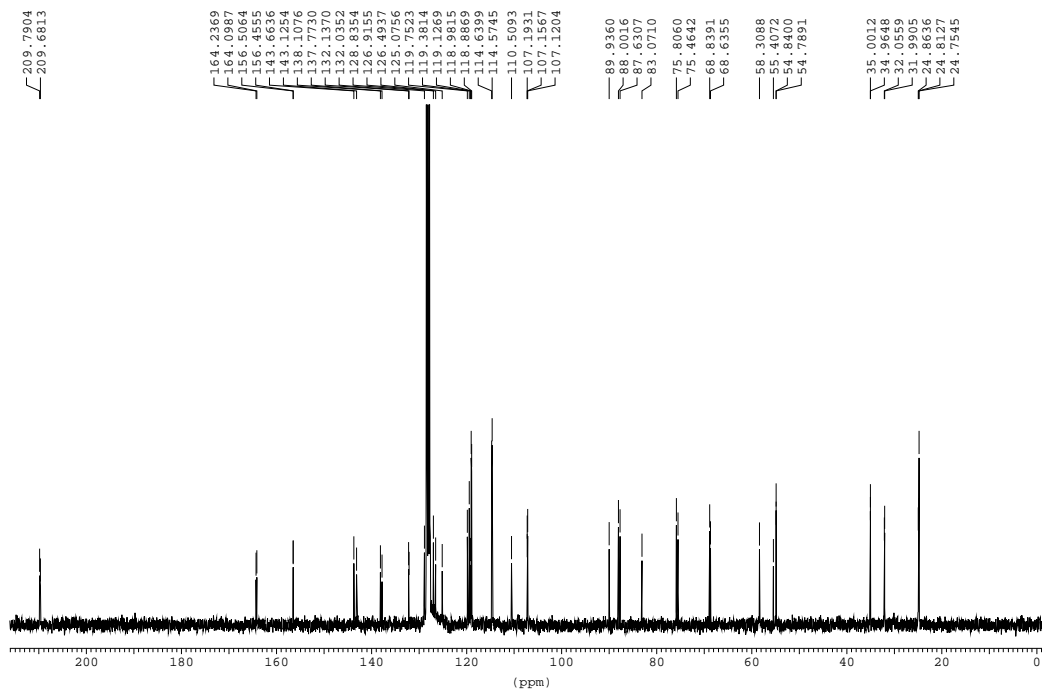

Q09SC856P

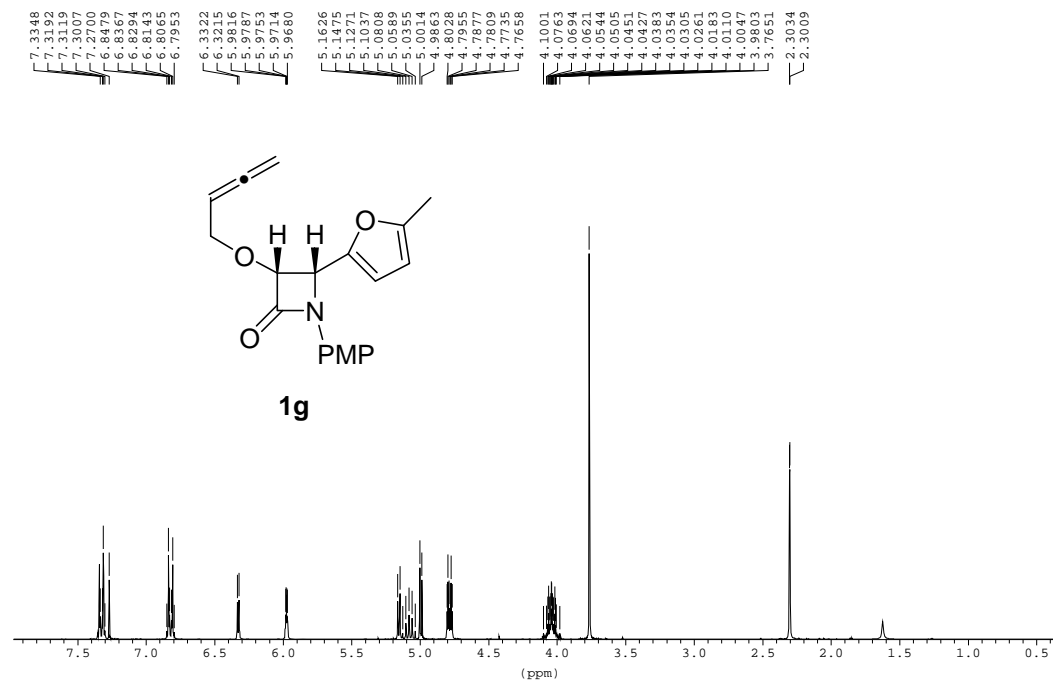

Q09SC856P

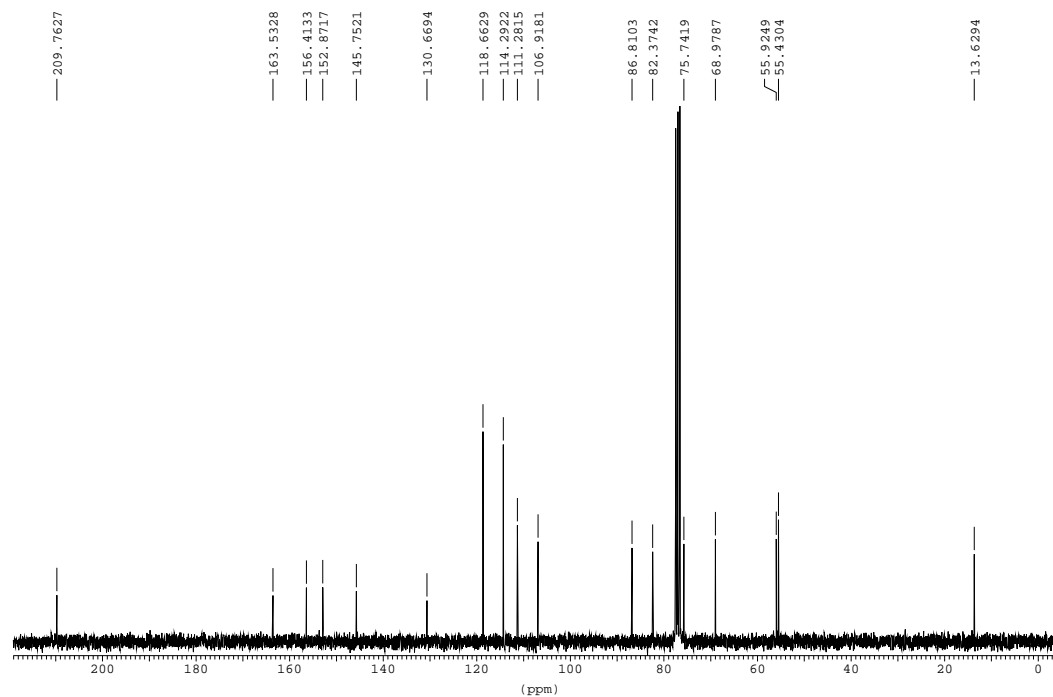

Q09SC872P

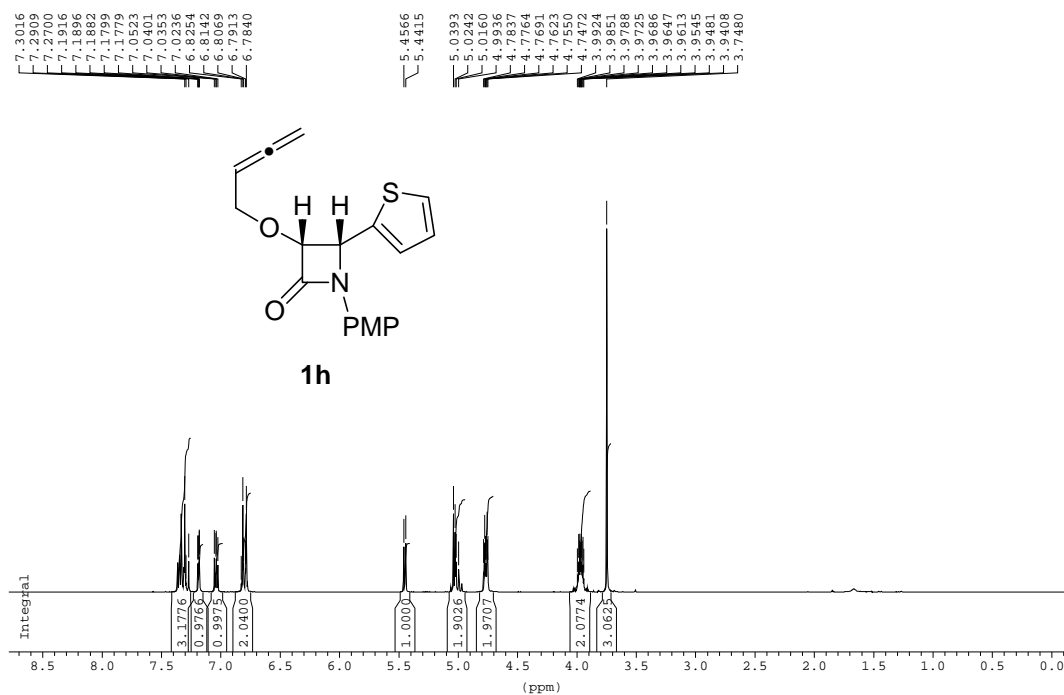

Q09SC872P

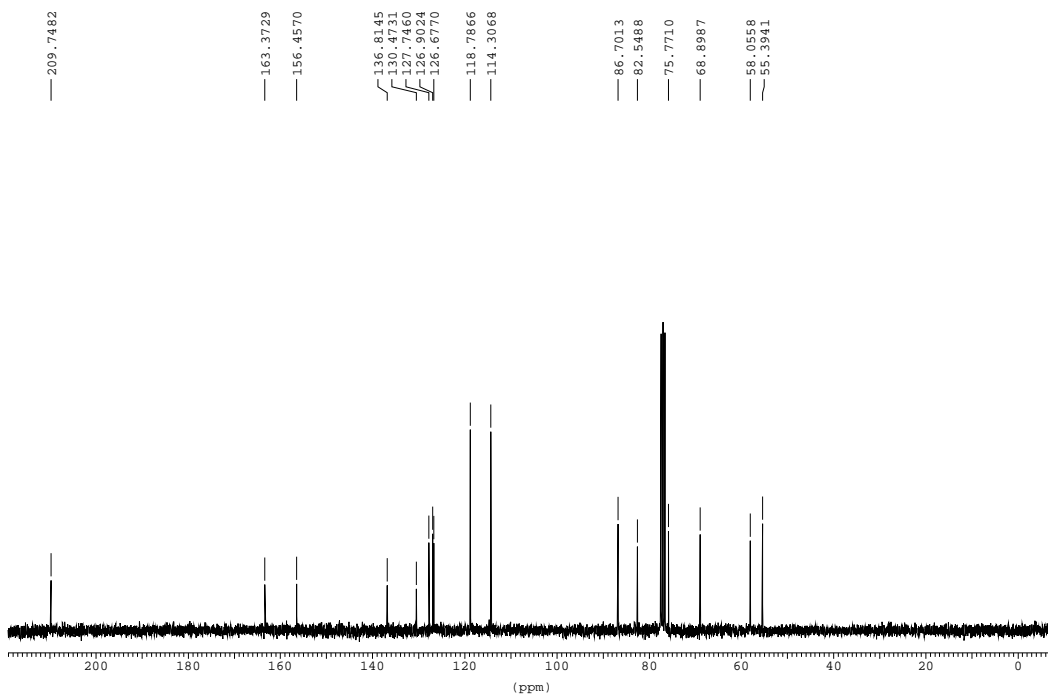

Q09SC1198P

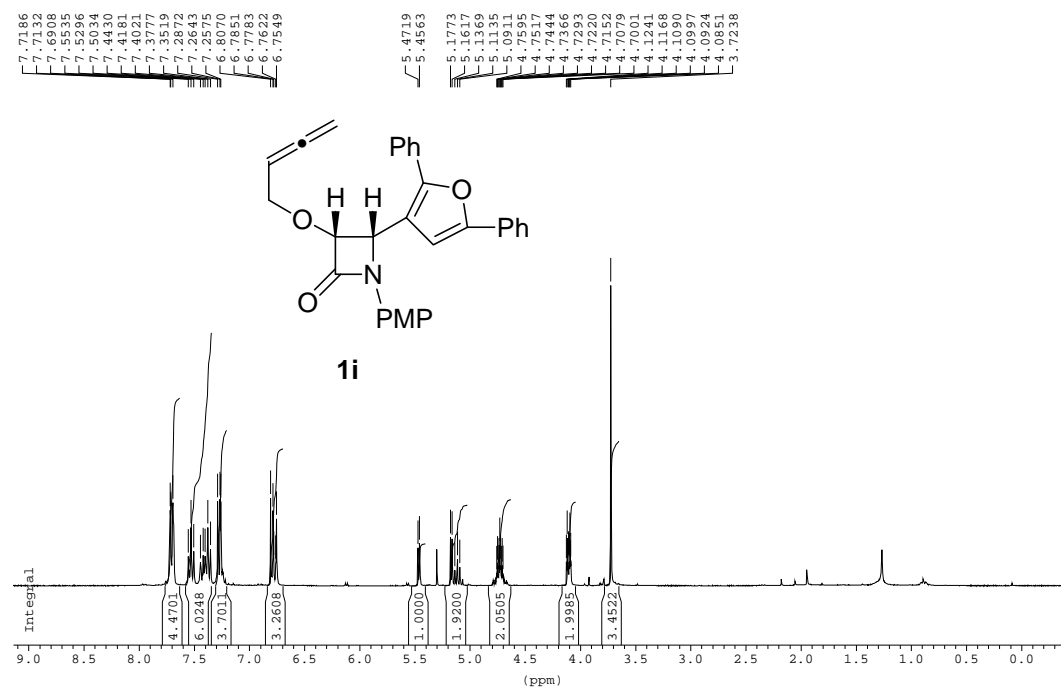

Q09SC1198P

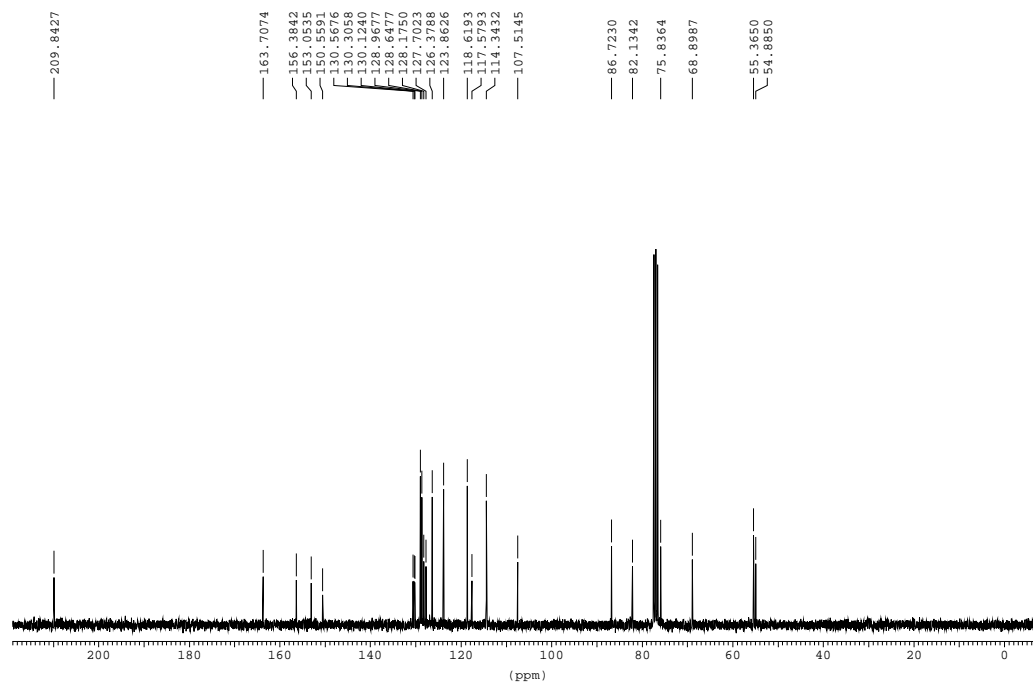

Q09SC1097P

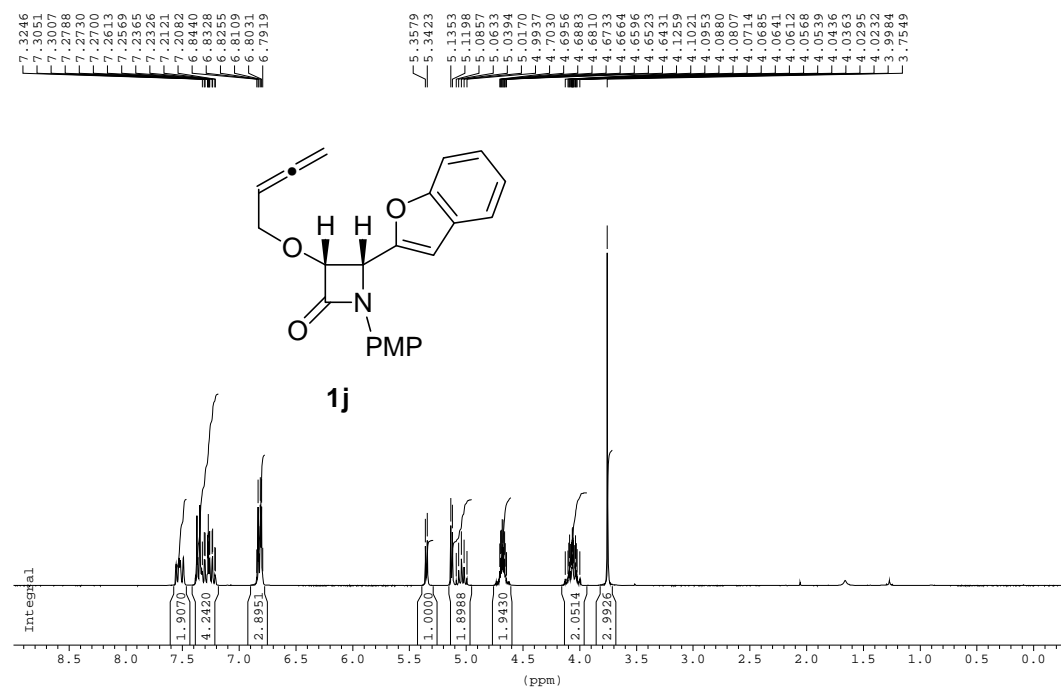

Q09SC1097P

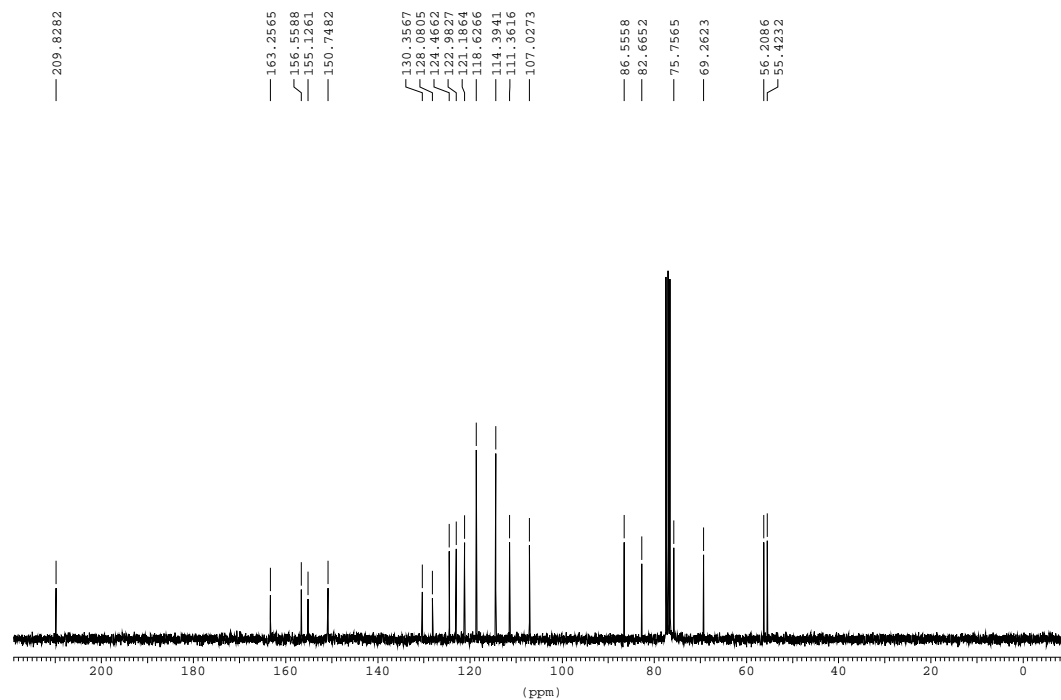



Q09SC1100P

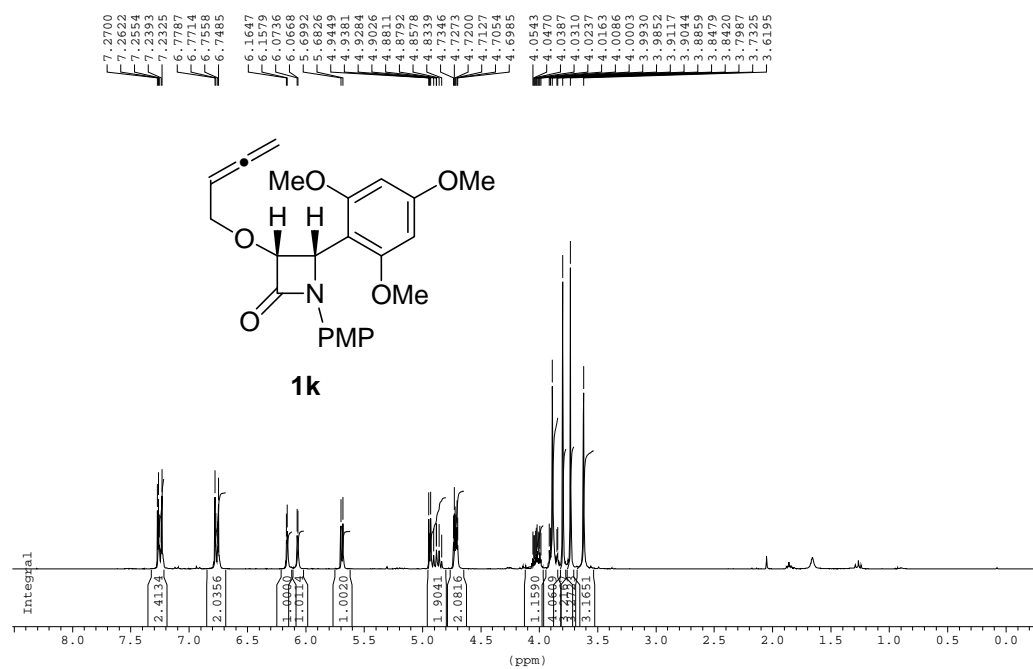

Q09SC1100P

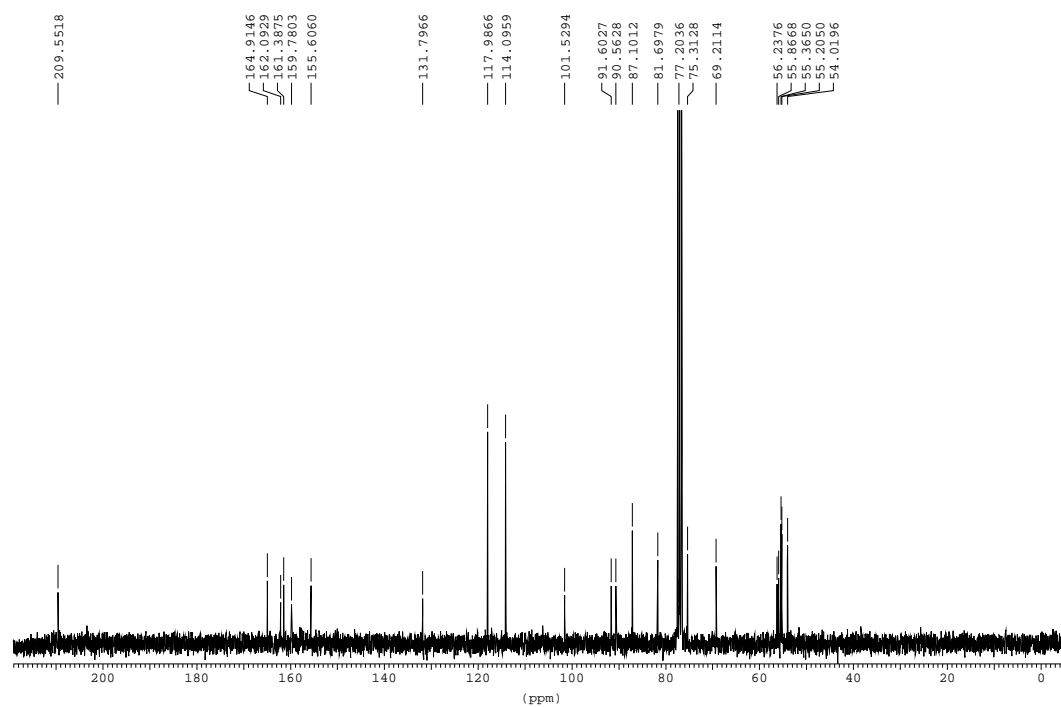

Q09SC1080P

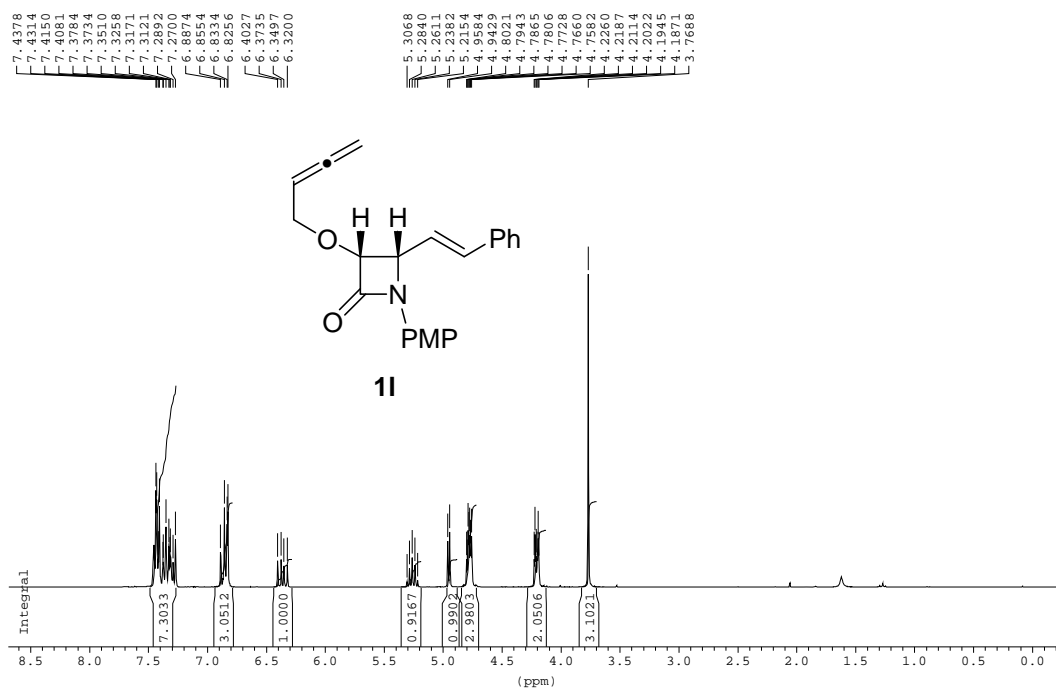

Q09SC1080P

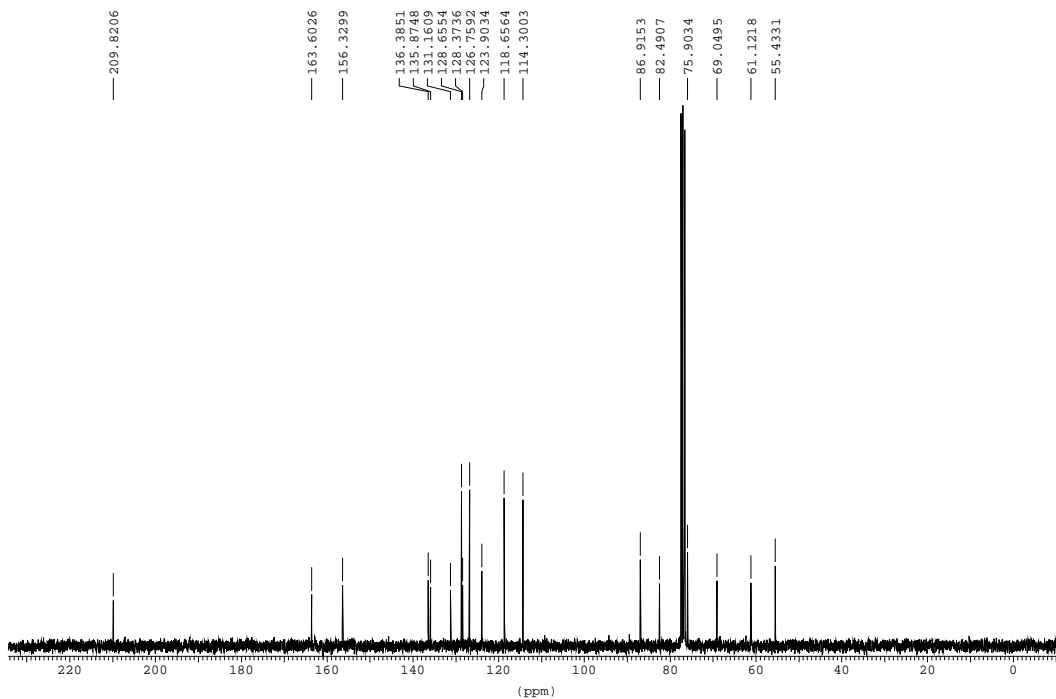

Q09SC1159P

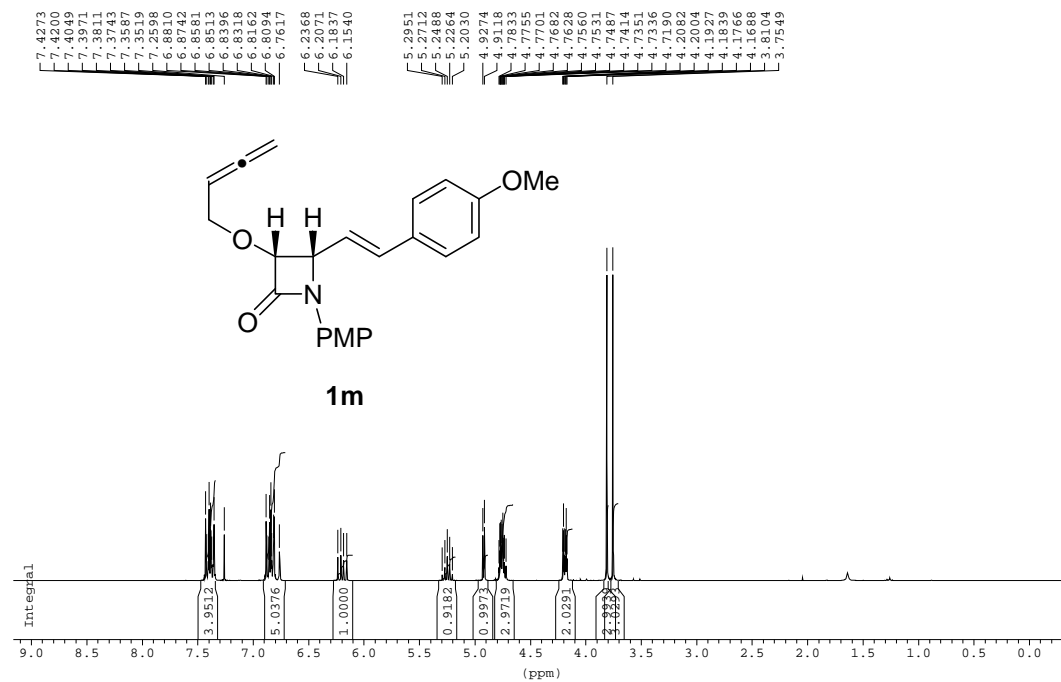

Q09SC1159P

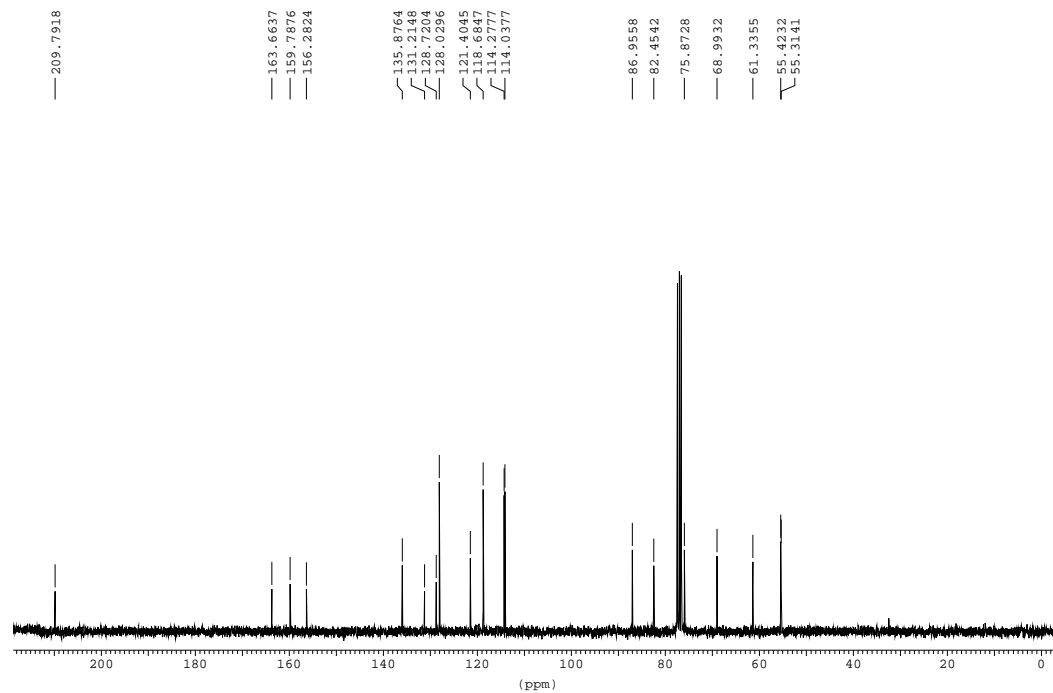

Q09SC1211AP

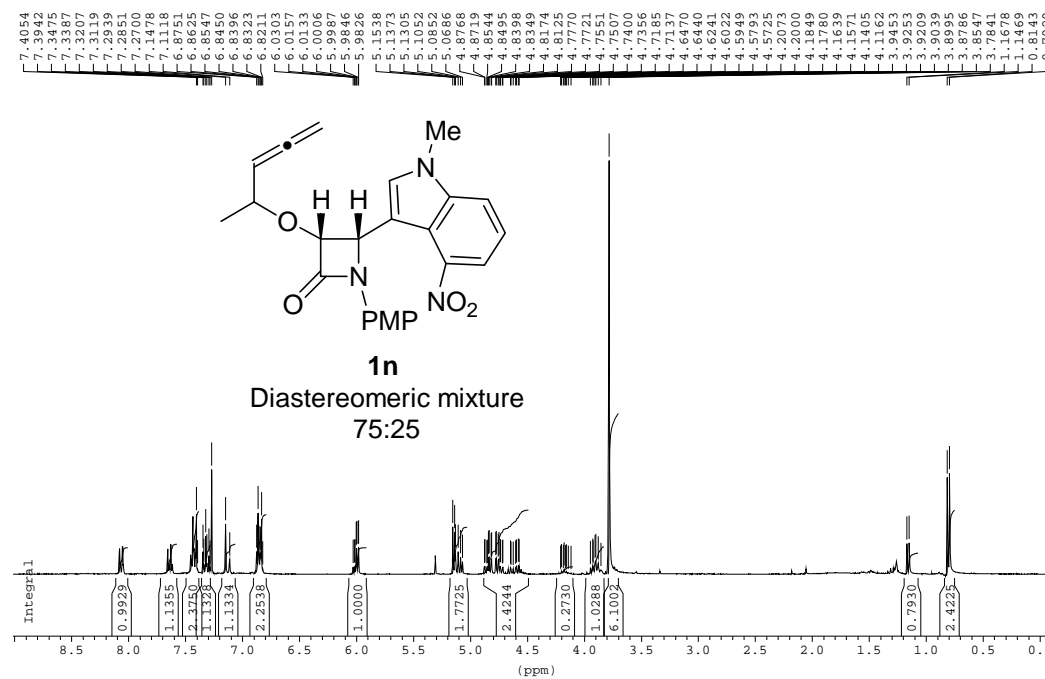

Q09SC1211AP

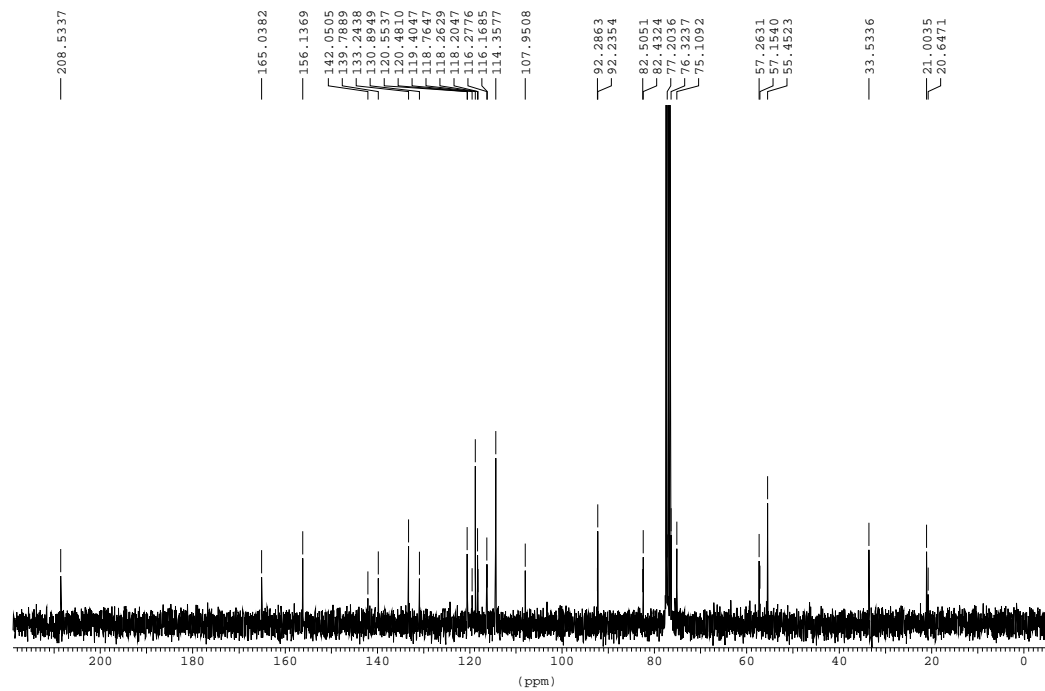

Q09SC1211BP

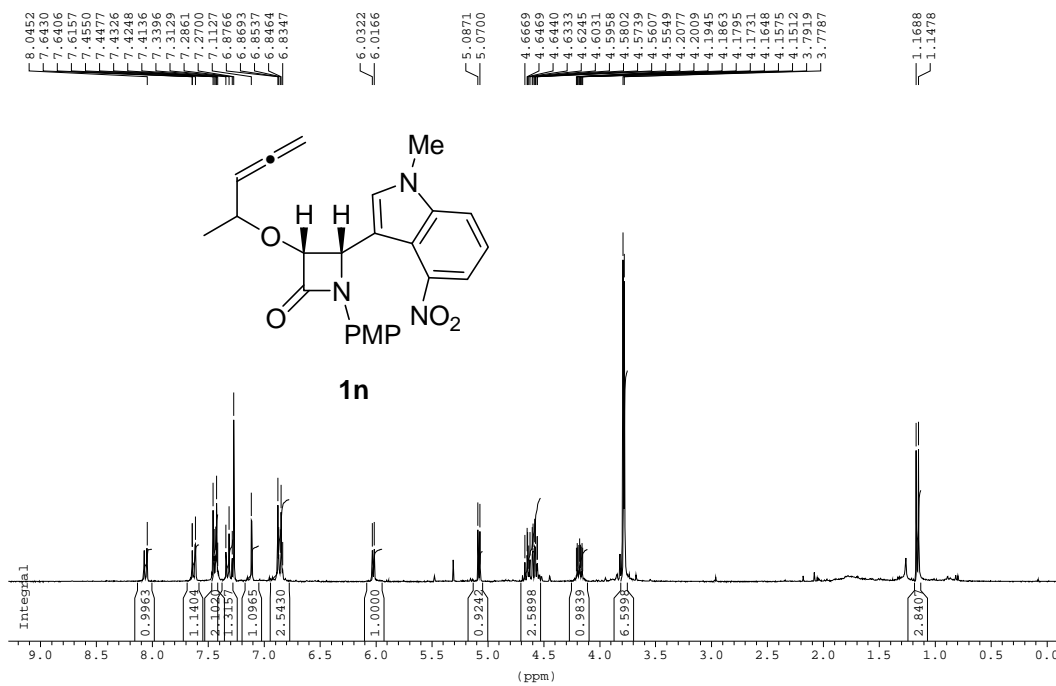

Q09SC1211BP

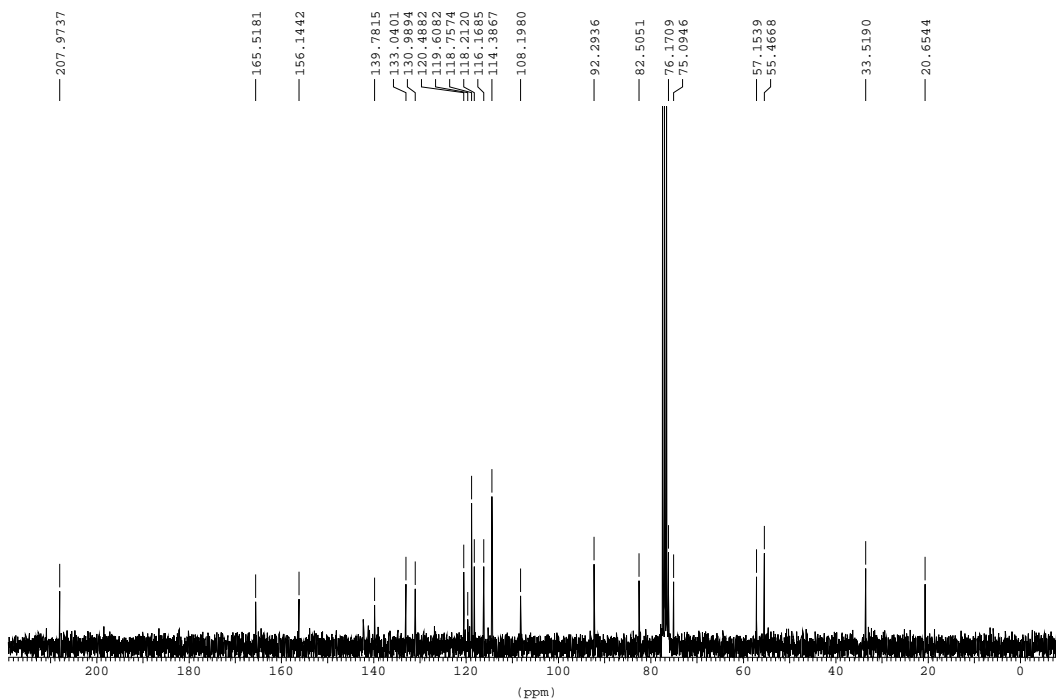

Q09SC935P

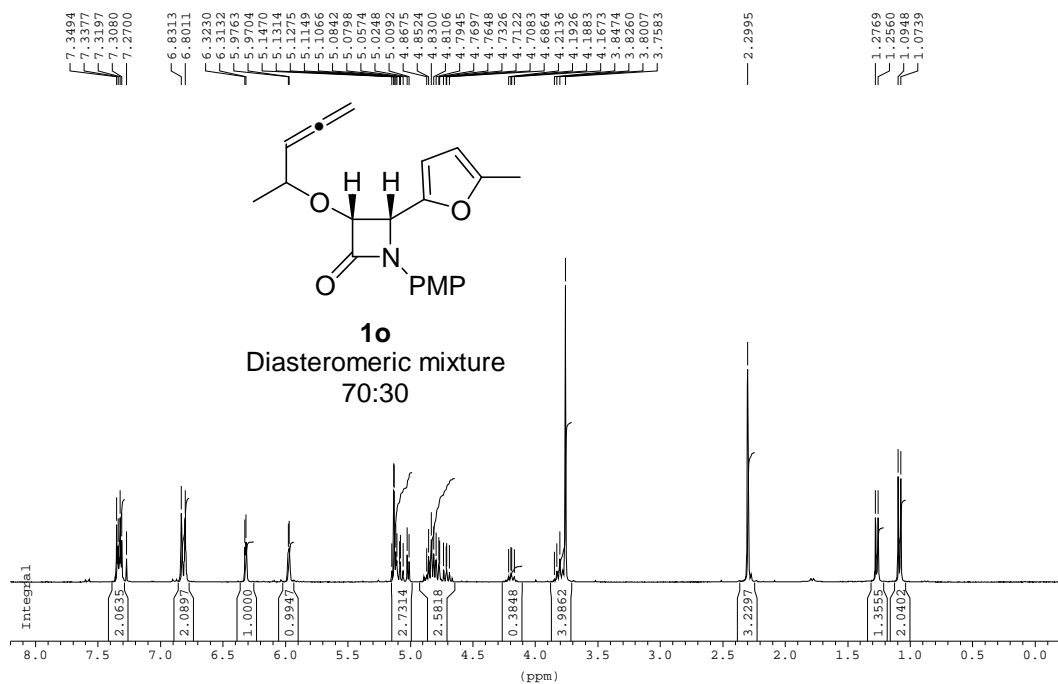

Q09SC935P

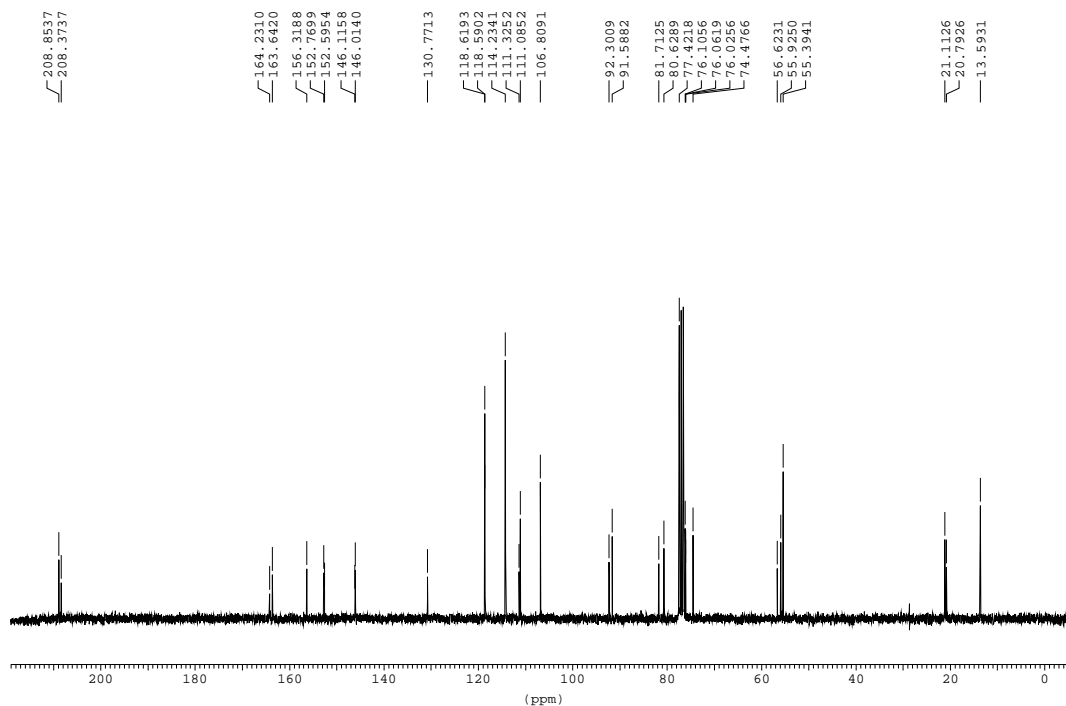

Q09SC1238P

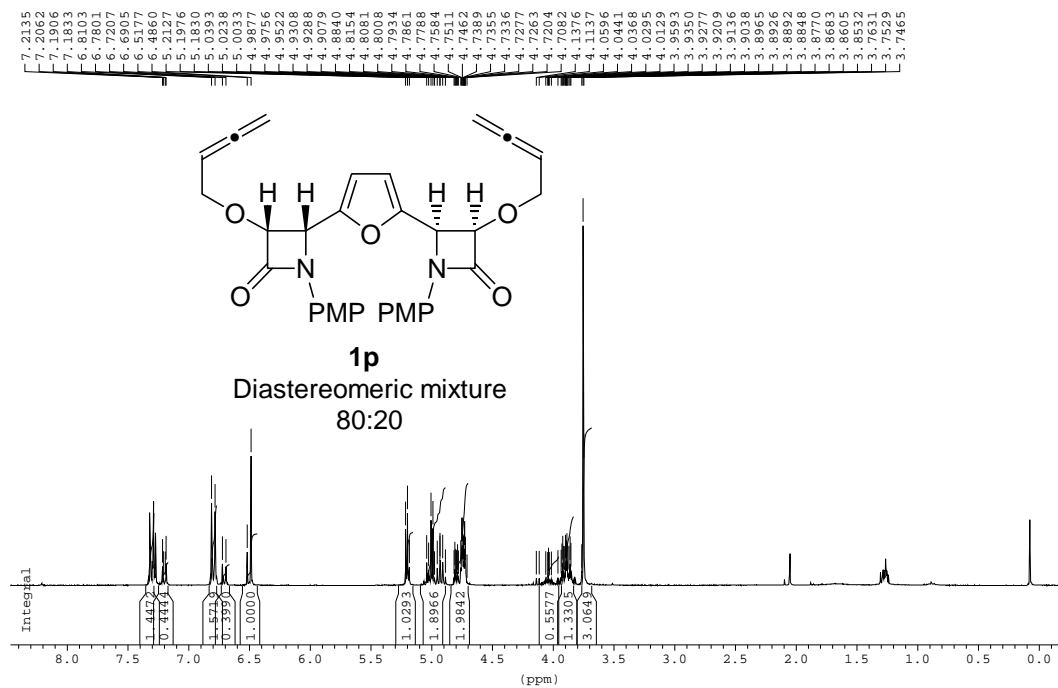

Q09SC1238P

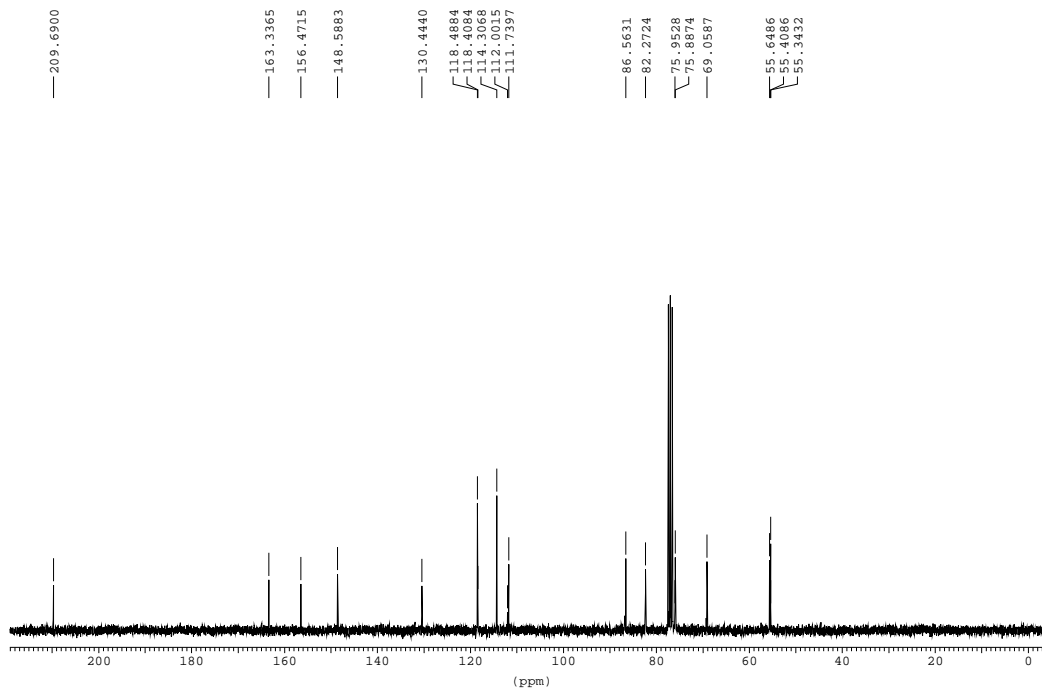

Q09SC1729P

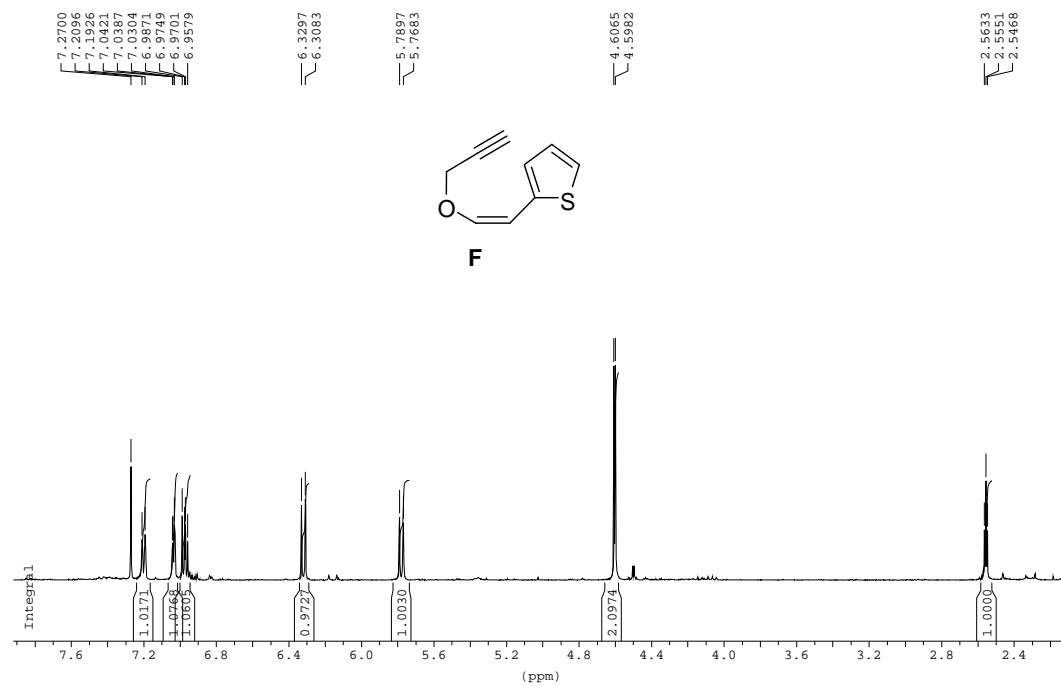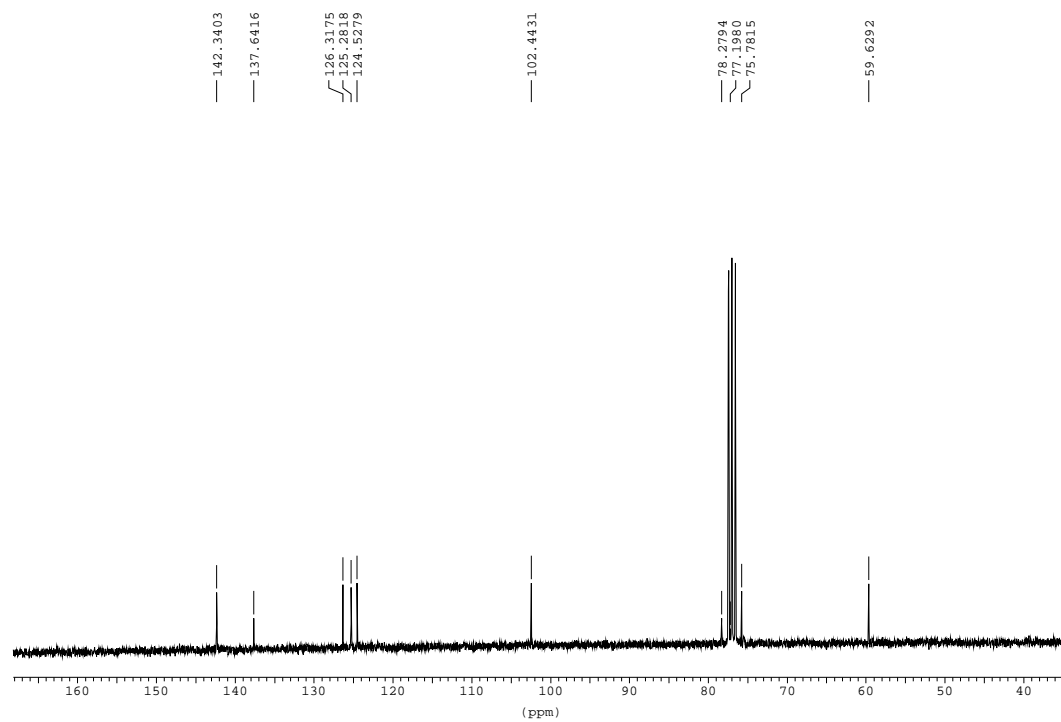



Q09SC1735A

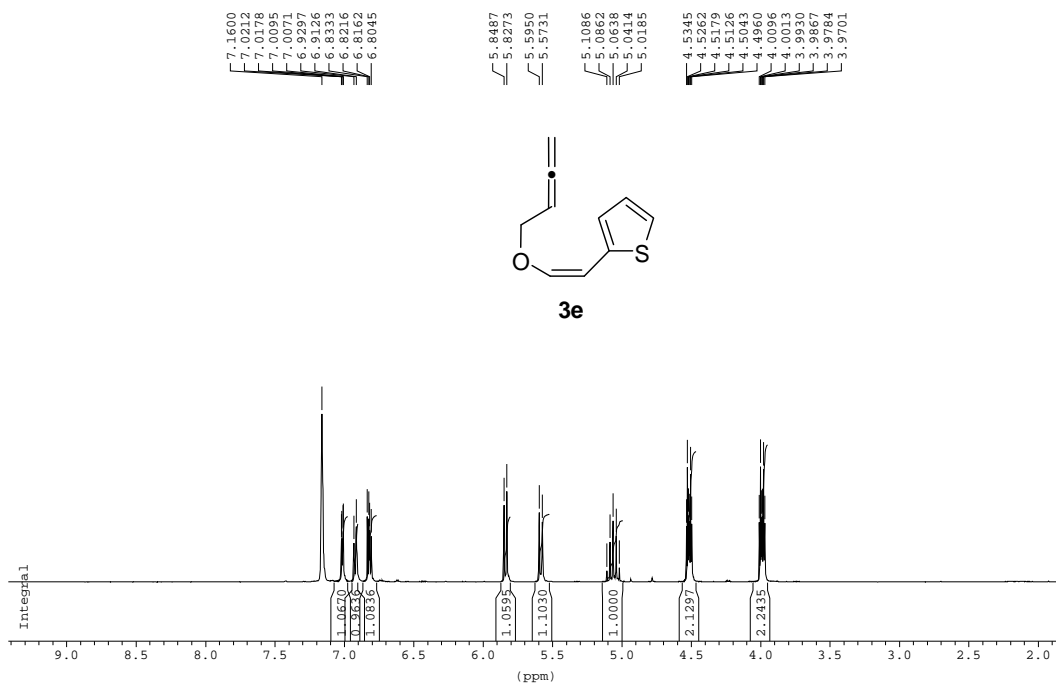

Q09SC1735A

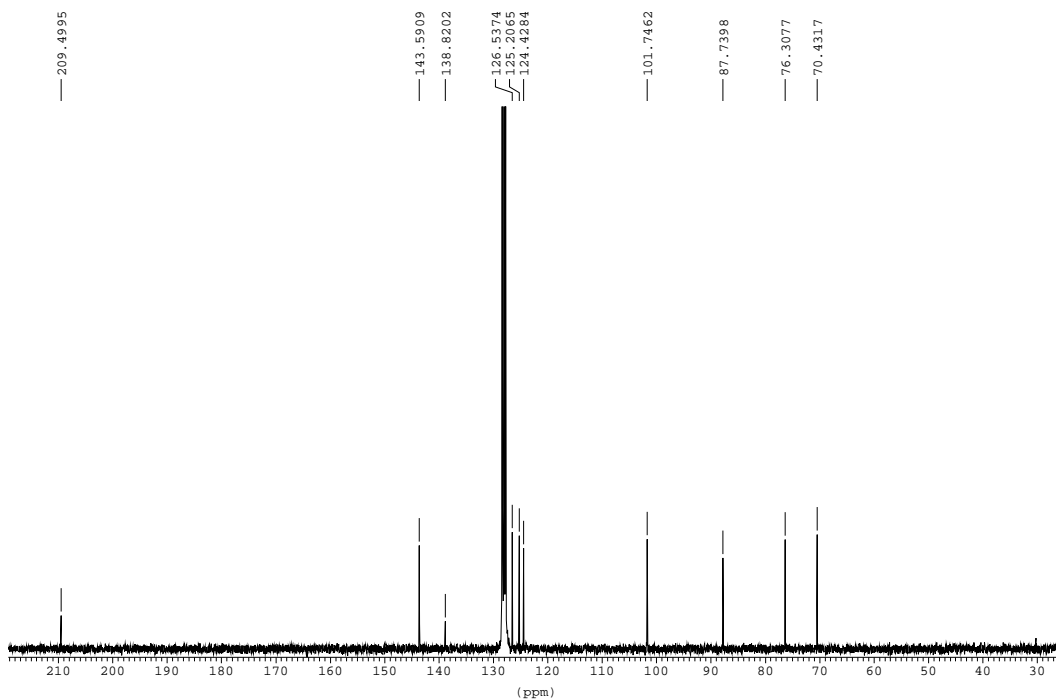

Q09SC502A

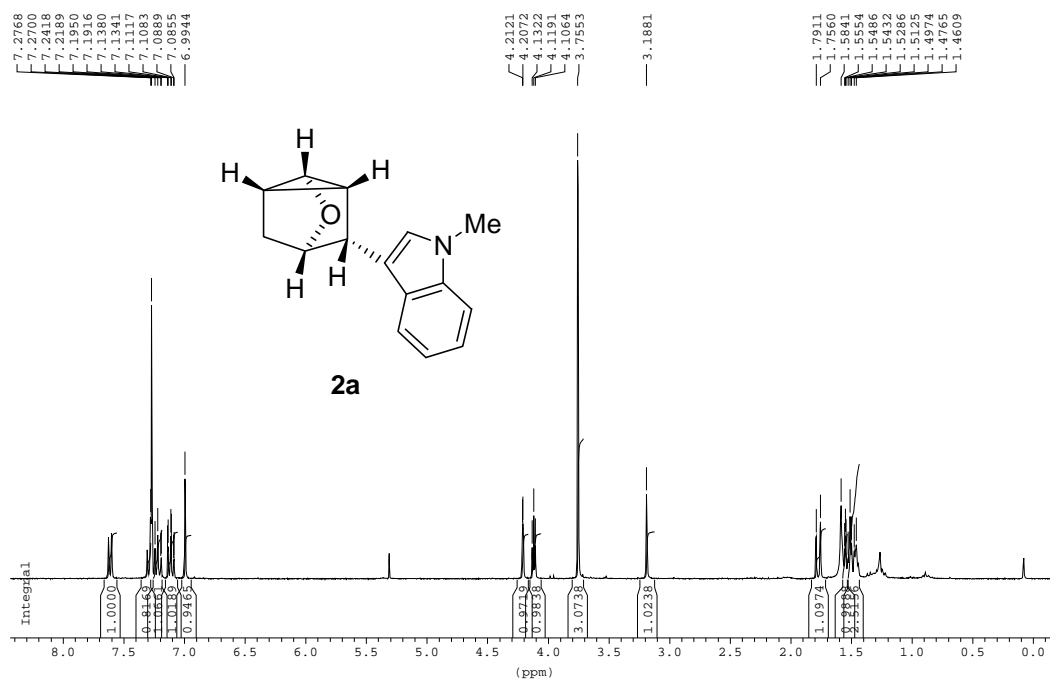

Q09SC502A

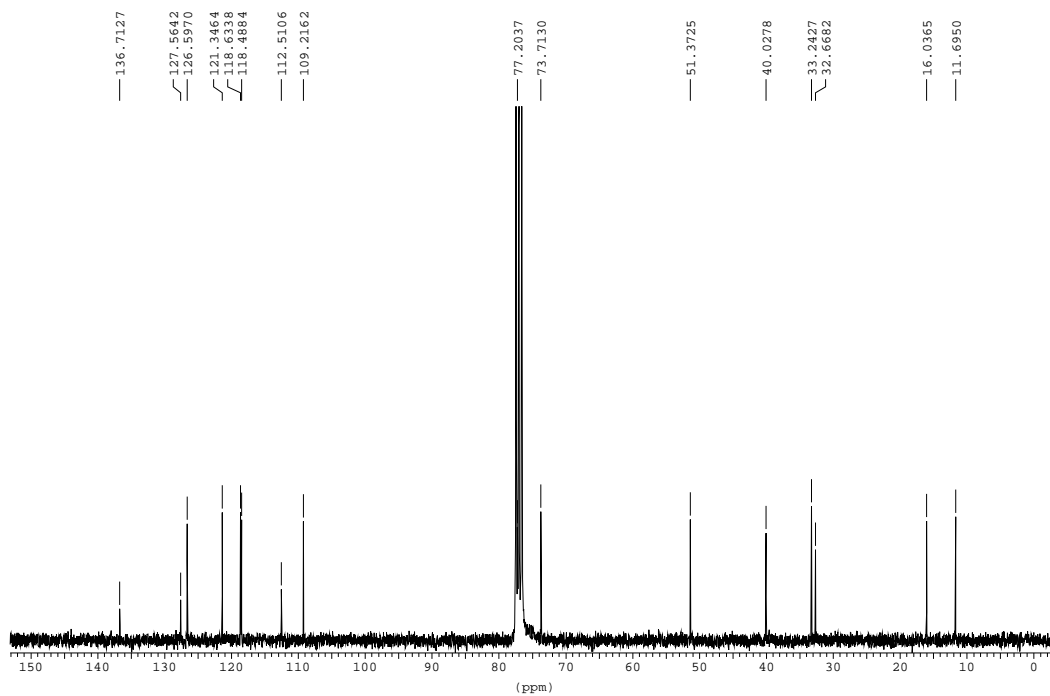

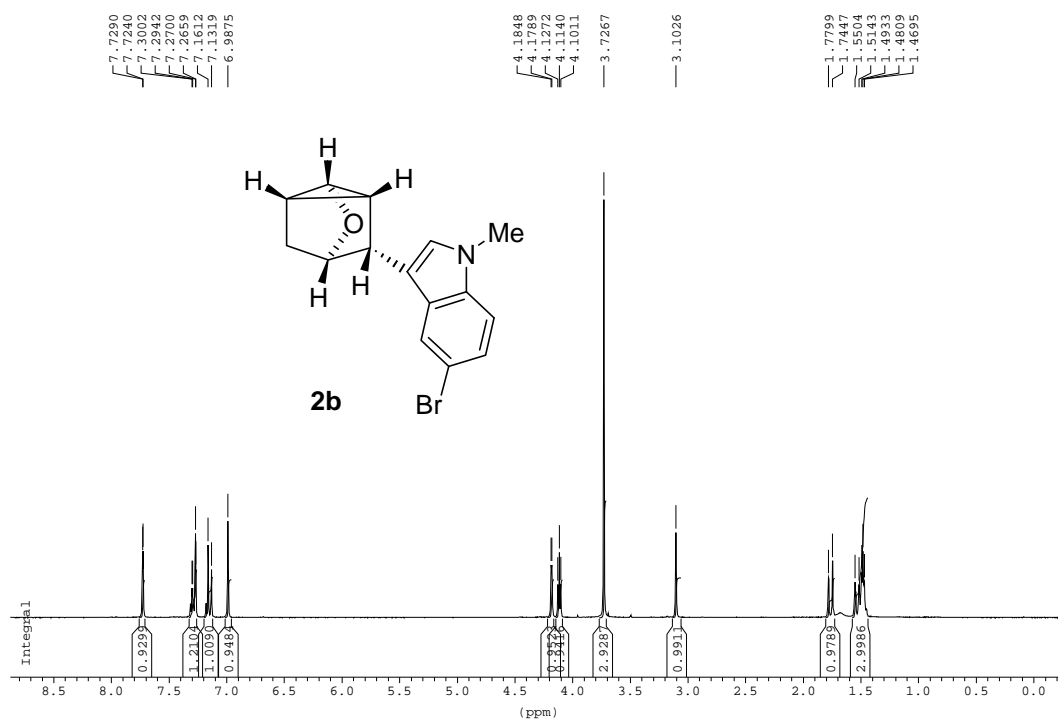

Q09SC659B

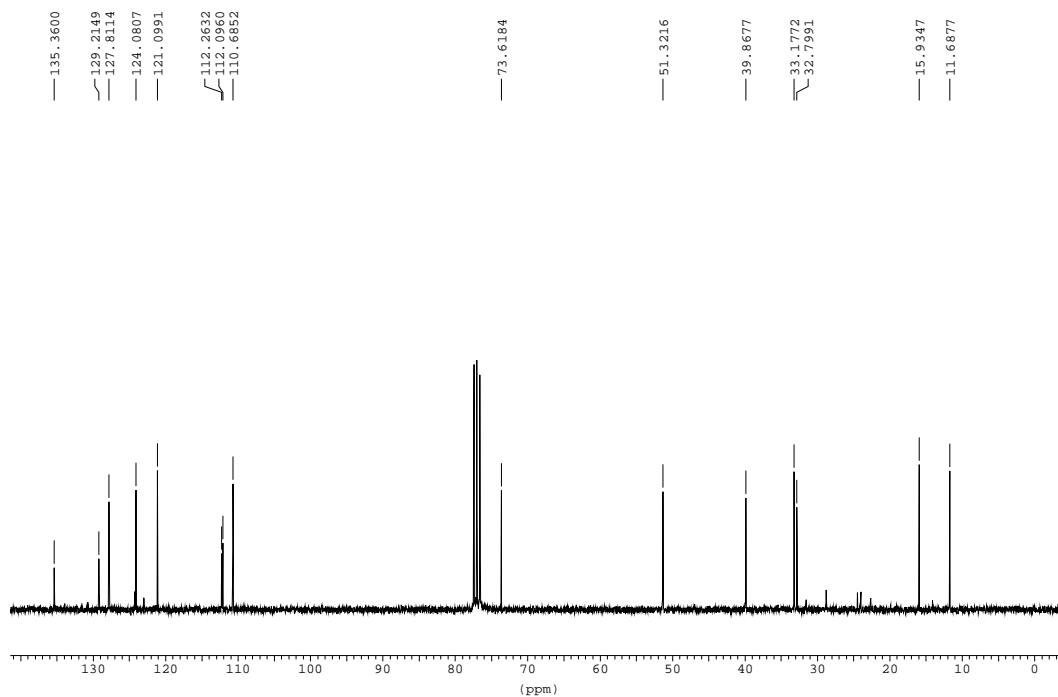

Q09SC729P

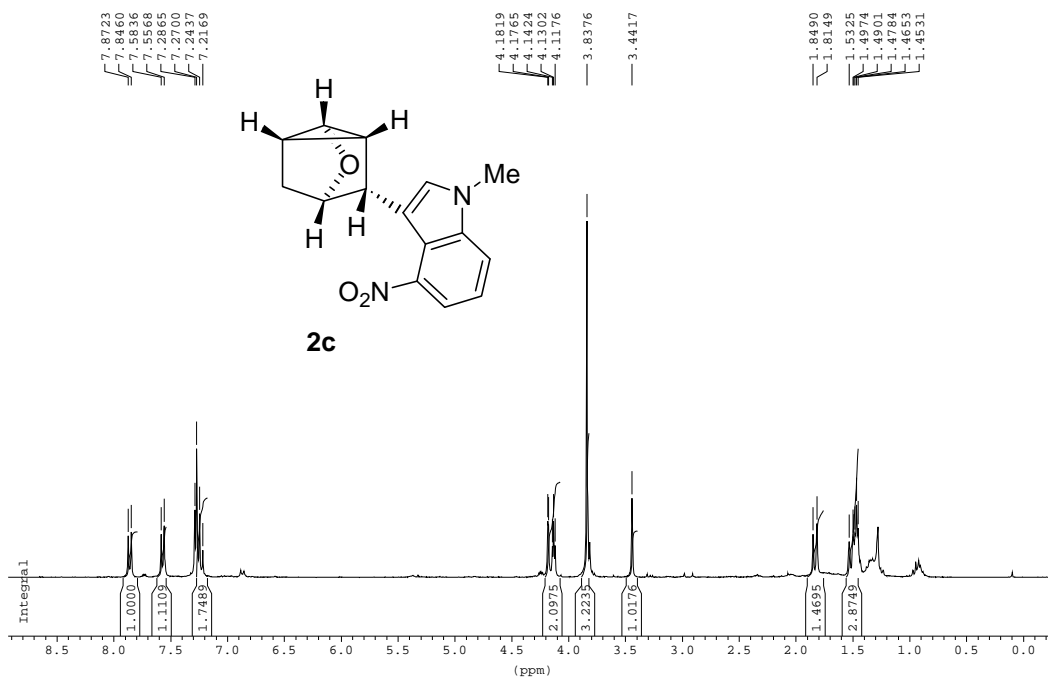

Q09SC727P

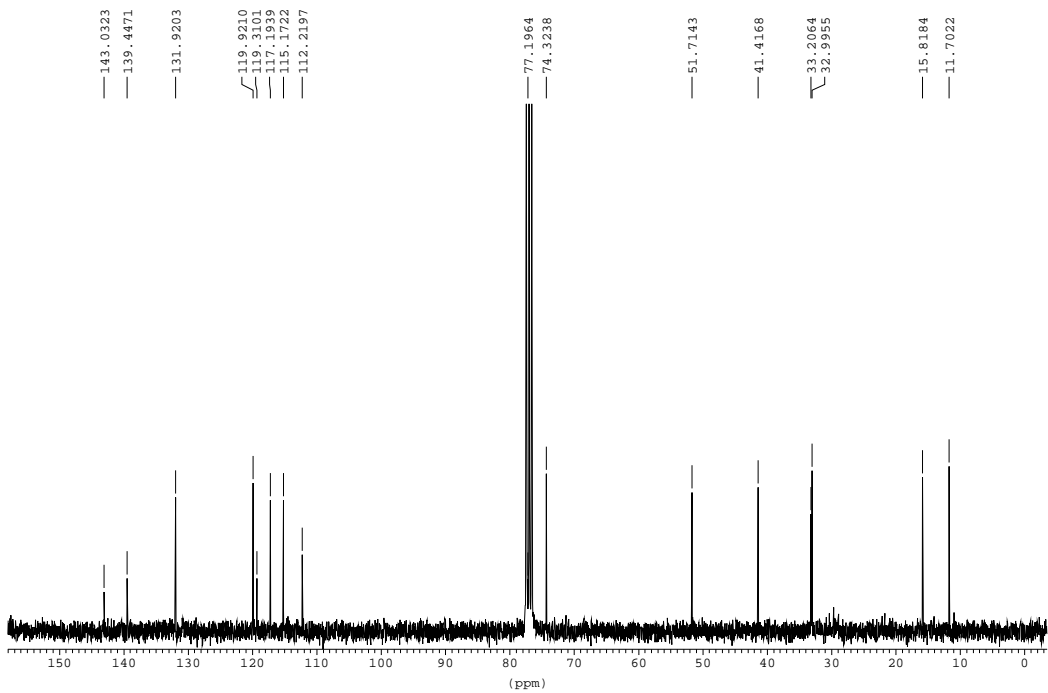

Q09SC1775PL

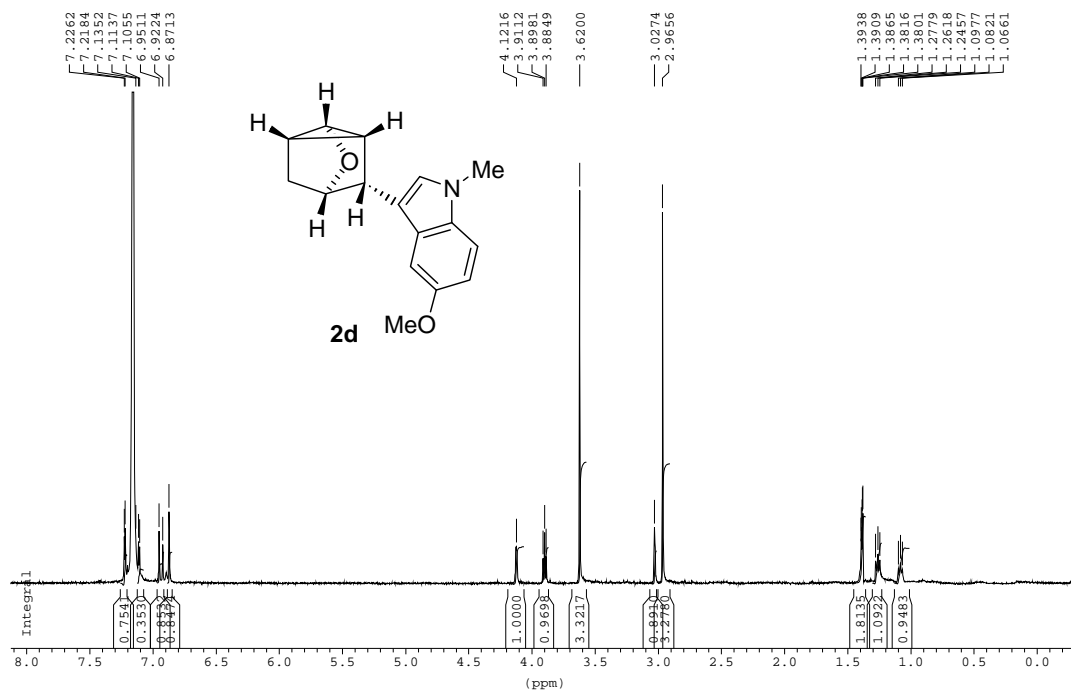

Q09SC1775P

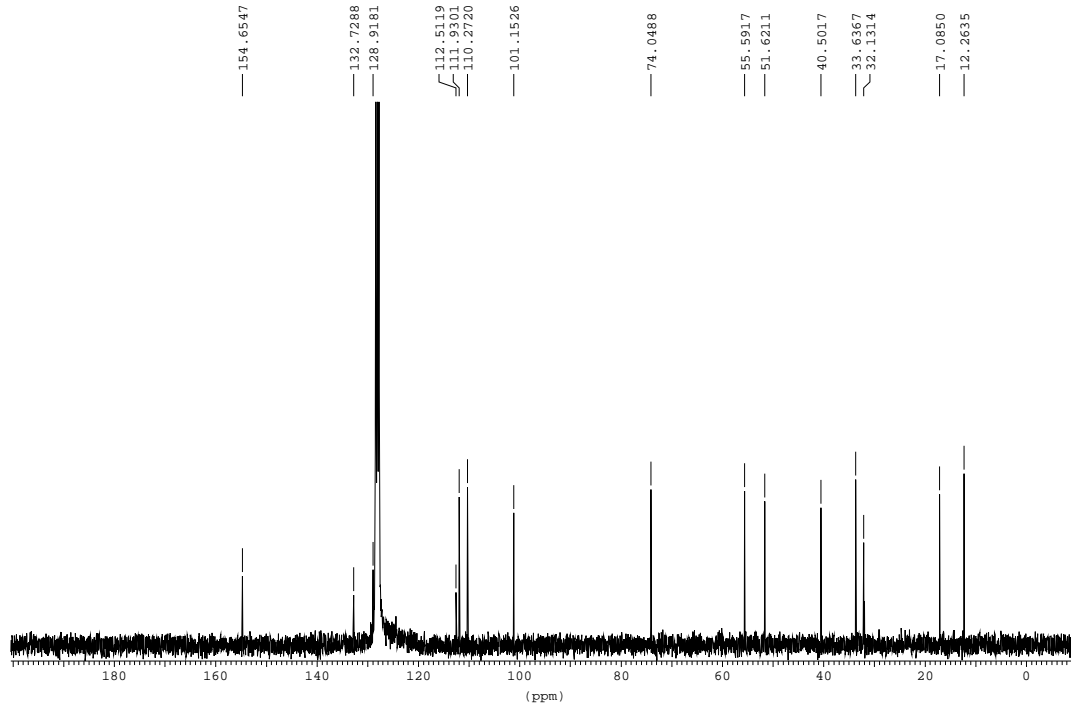

Q09SC1776P

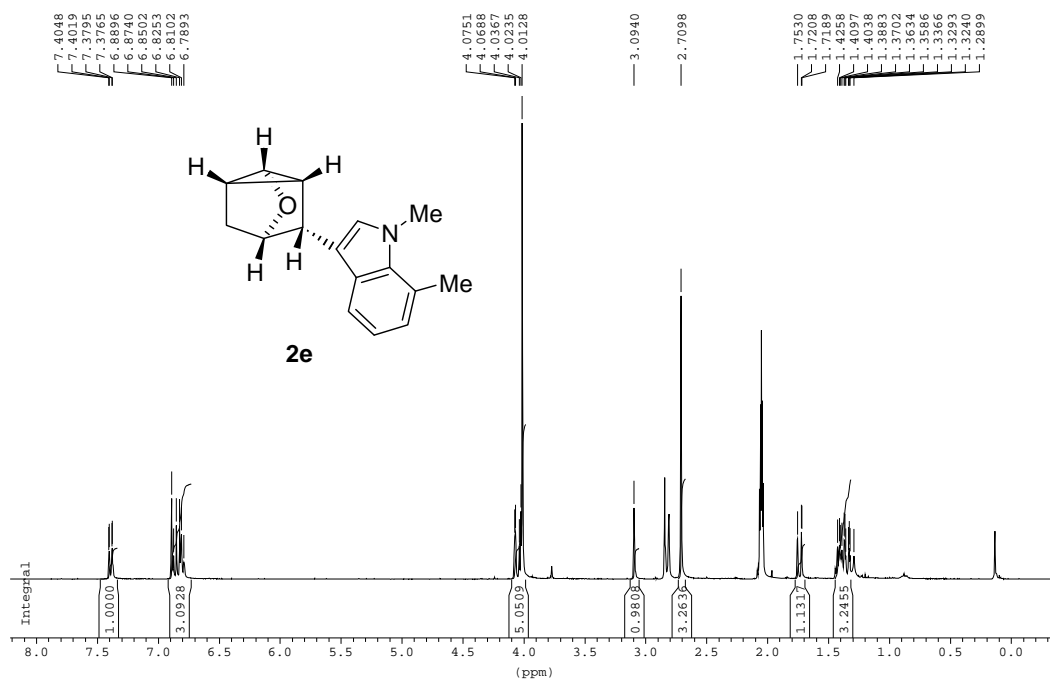

Q09SC1776P

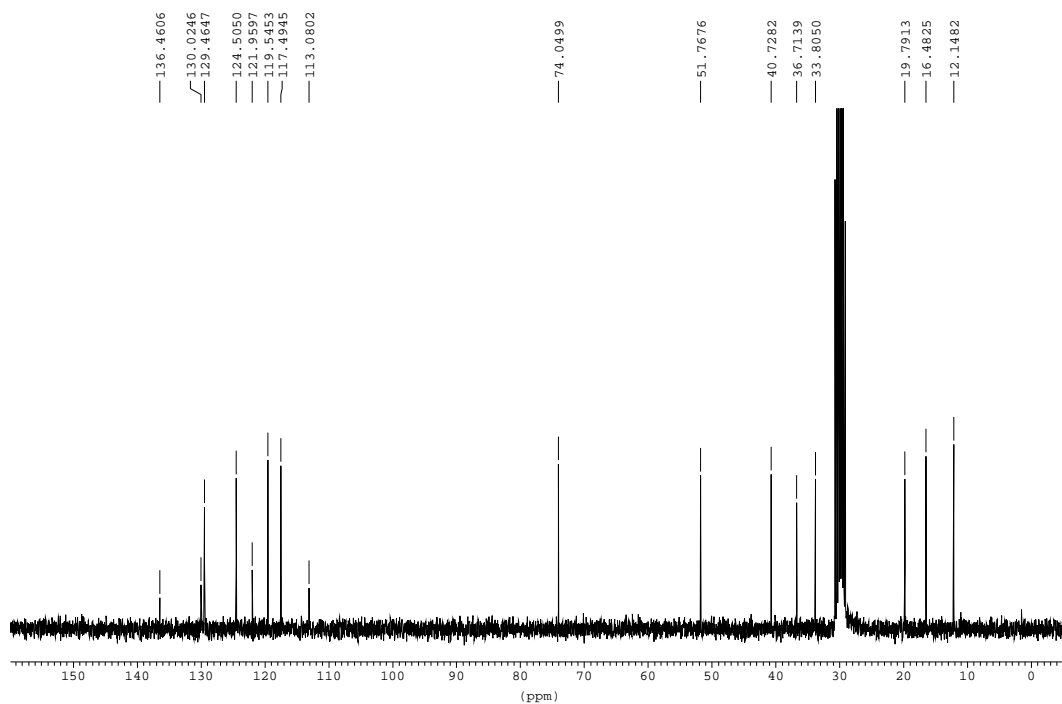

Q09SC1765B

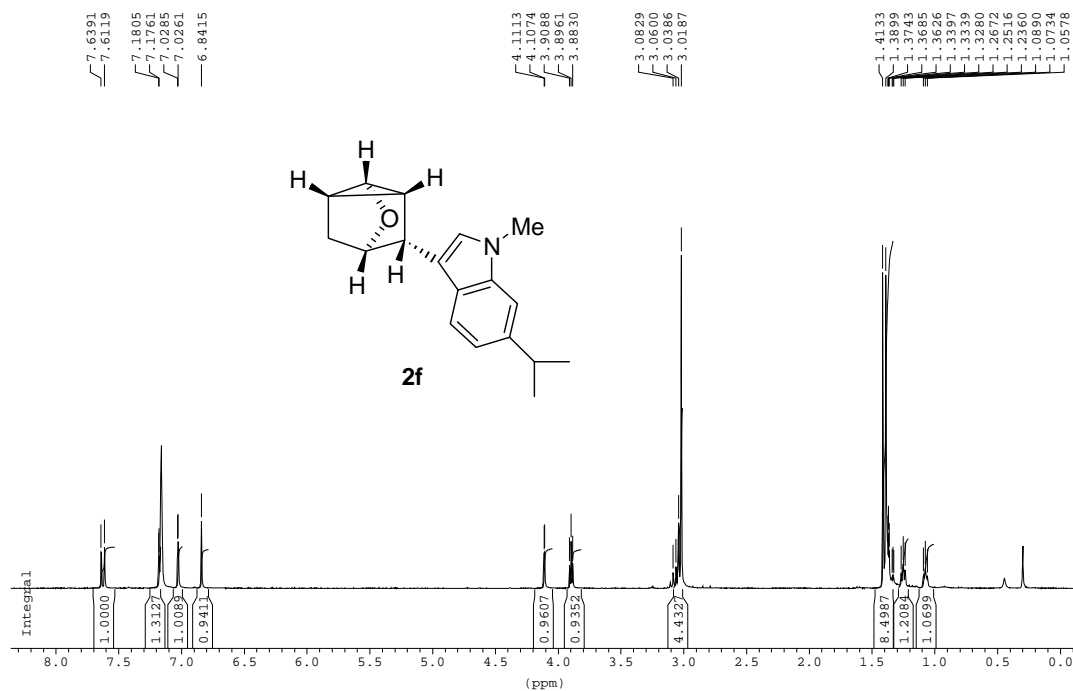

Q09SC1765B

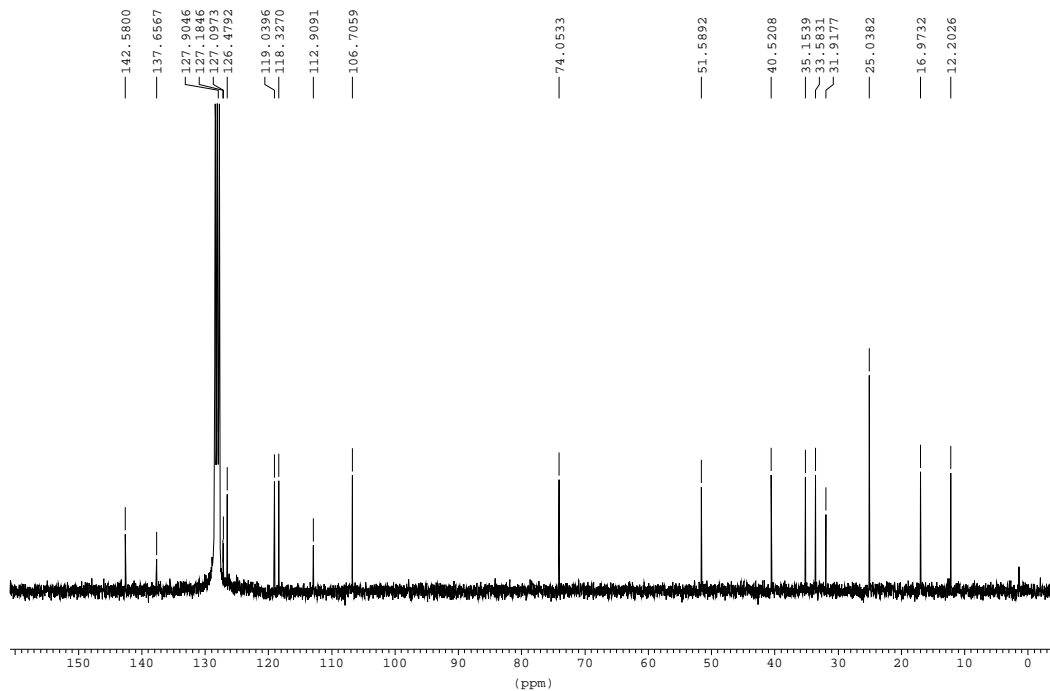

Q09SC559B

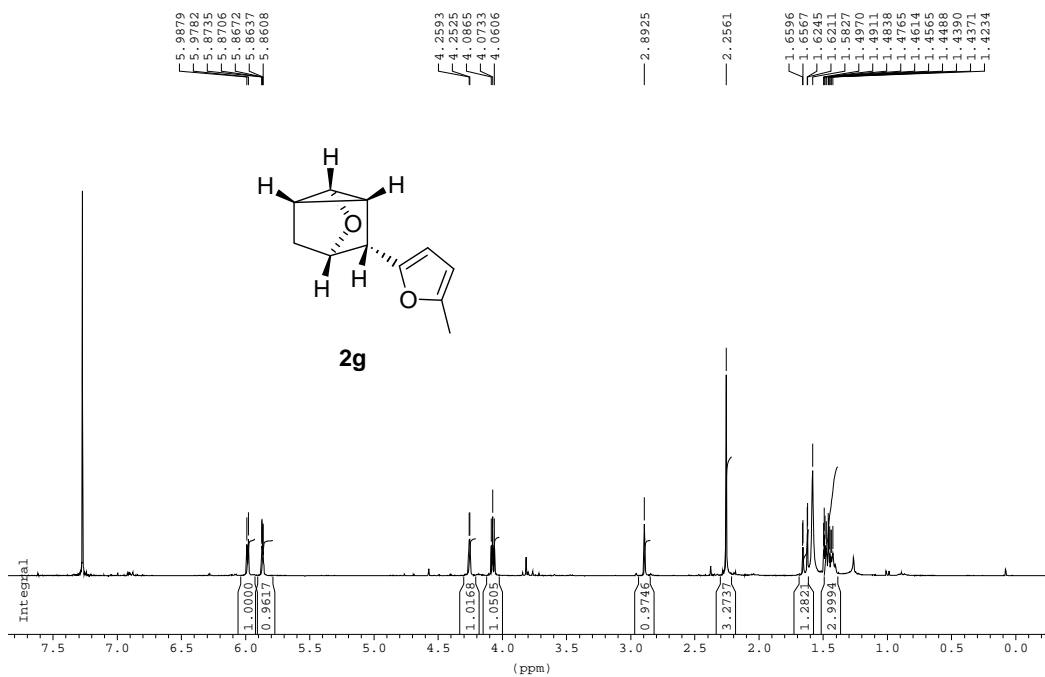

Q09SC873C

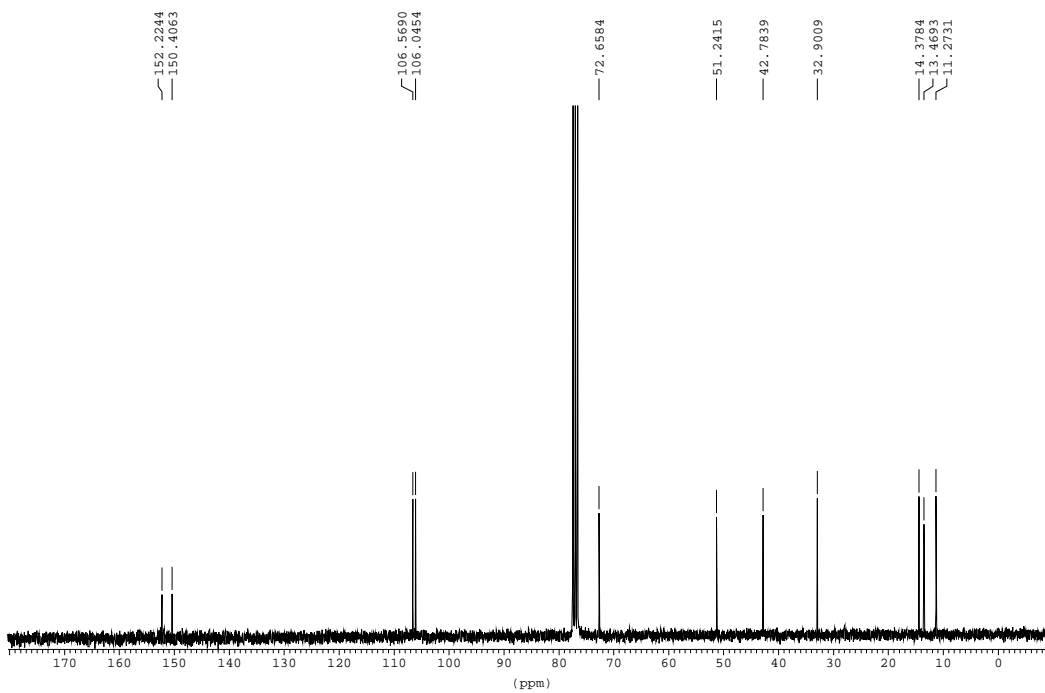



Q09SC876A

7.1760  
7.1716  
7.1590  
7.1551  
6.9535  
6.9423  
6.9369  
6.9252  
6.8923

4.1609  
4.1493  
4.1356

3.2051

1.7248  
1.6898  
1.6442  
1.5442  
1.5369  
1.5081  
1.5033  
1.4892

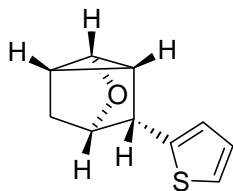

2h

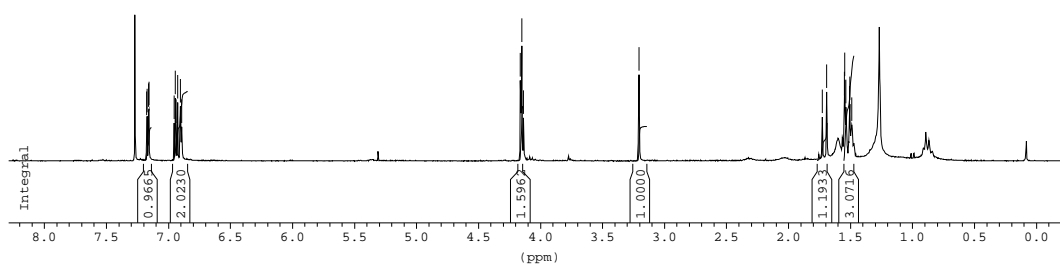

Q09SC889A

142.8505

126.2406  
124.9195  
123.9353

74.7602

51.5907

44.7329

33.3009

17.9128

12.5531

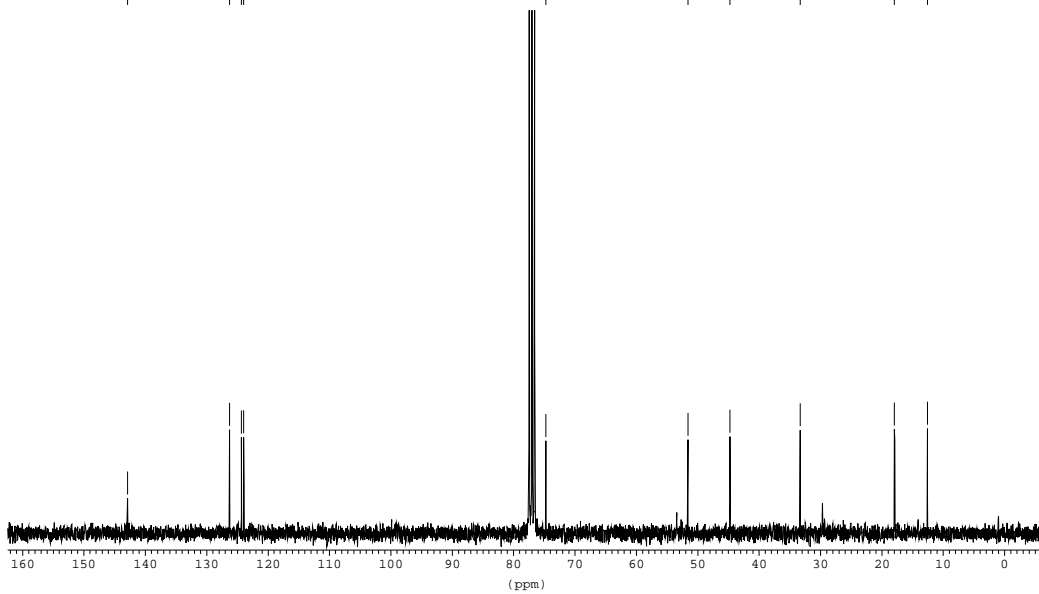

Q09SC1237B

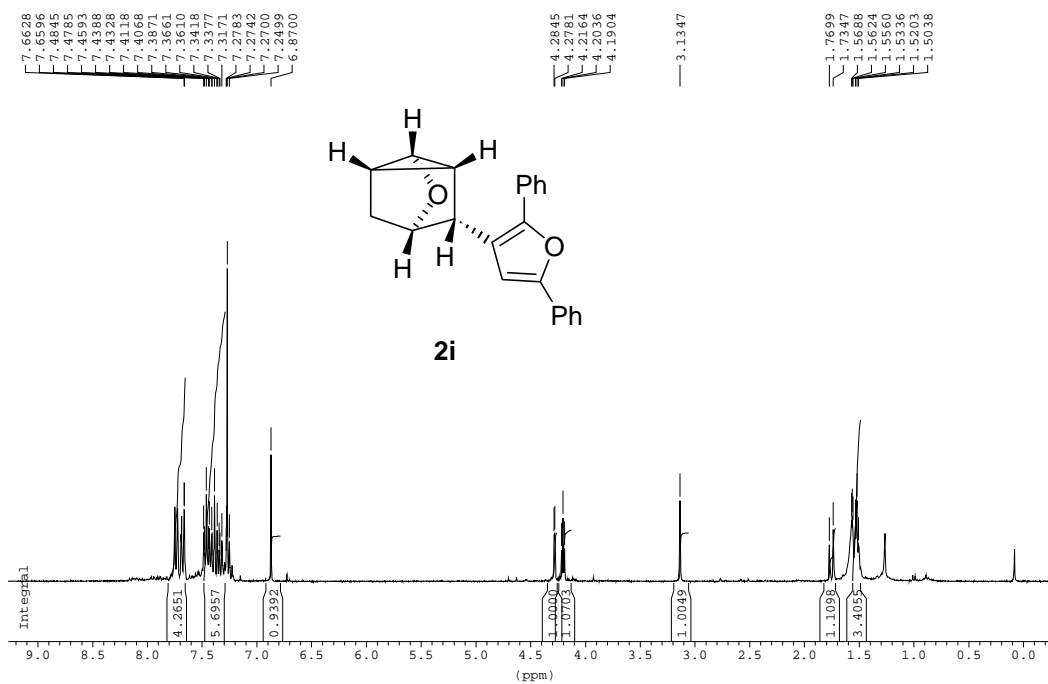

Q09SC1237B

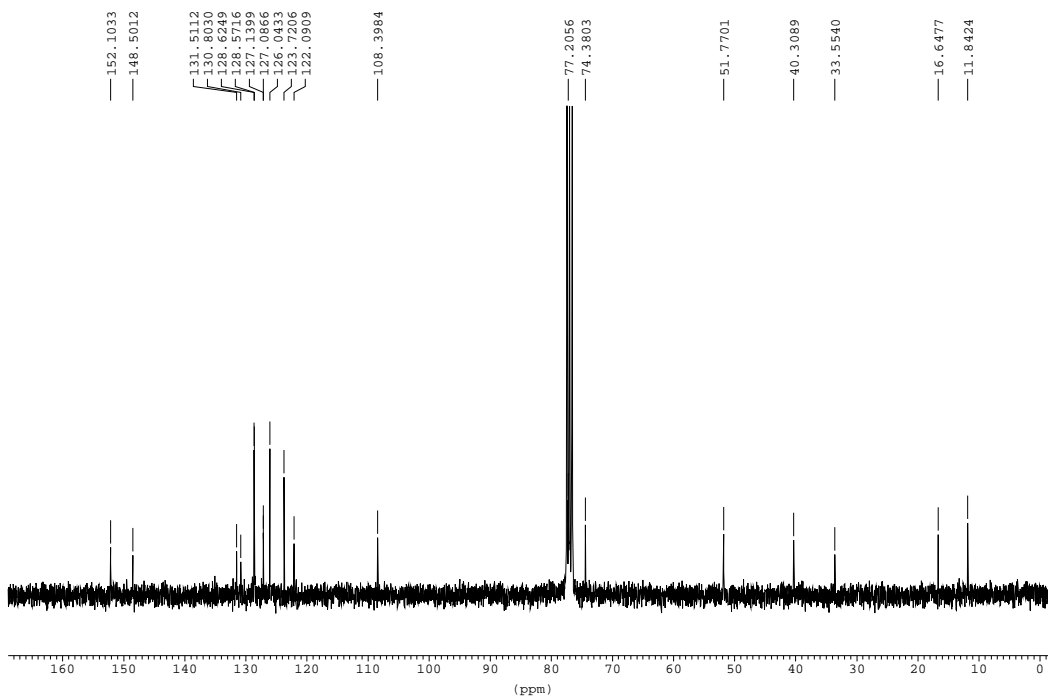

Q09SC1111A

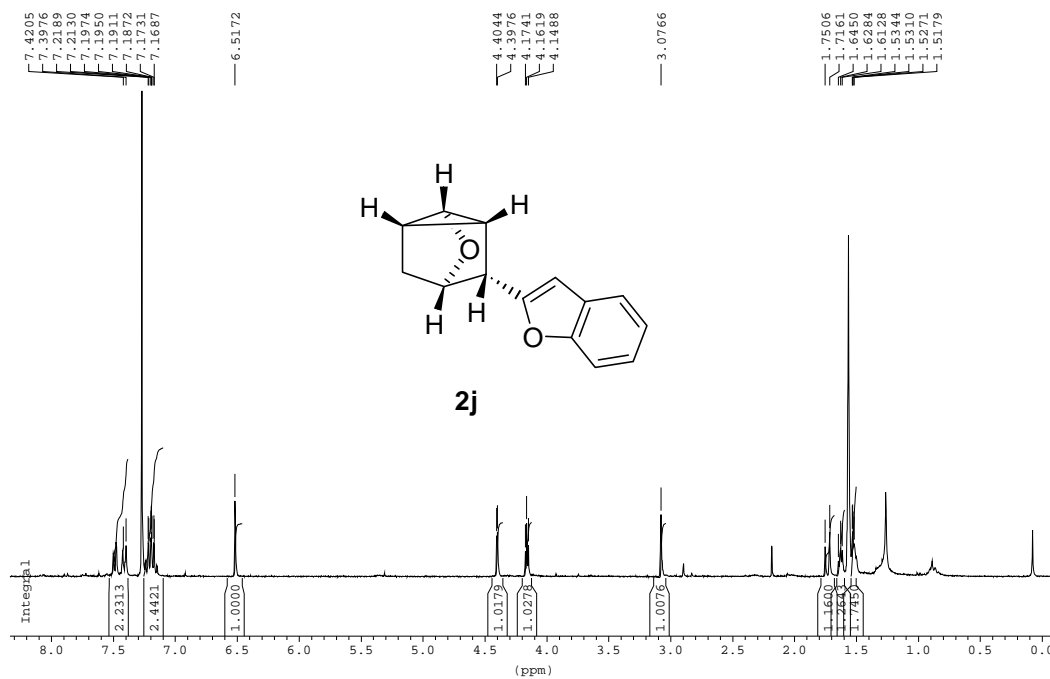

Q09SC1111A

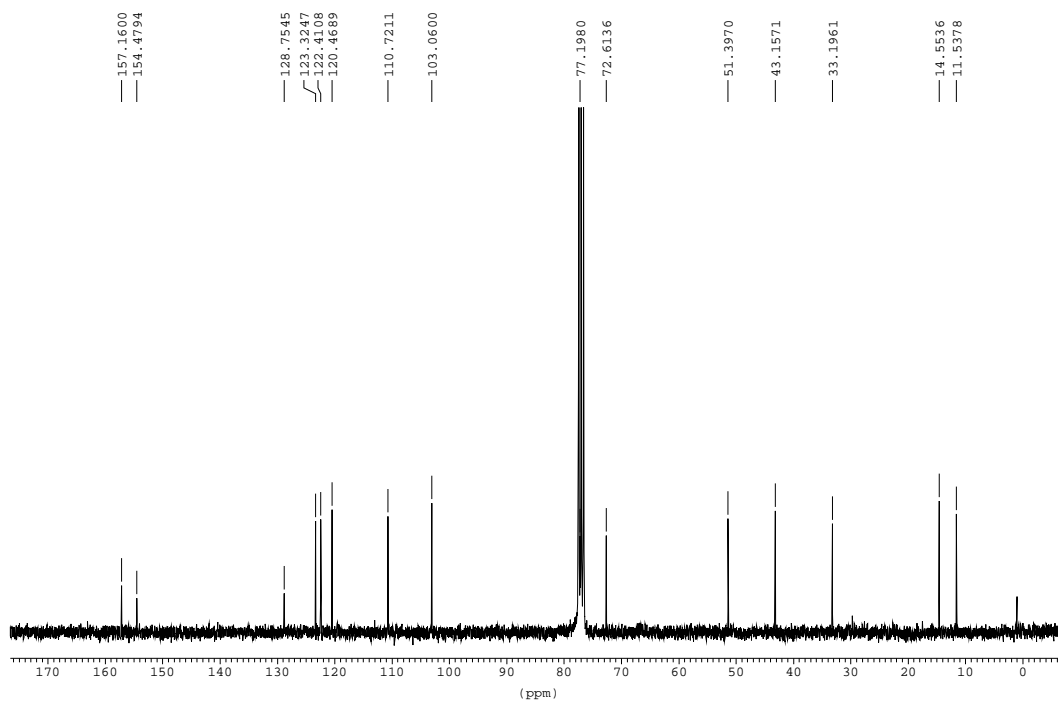

Q09SC1106A

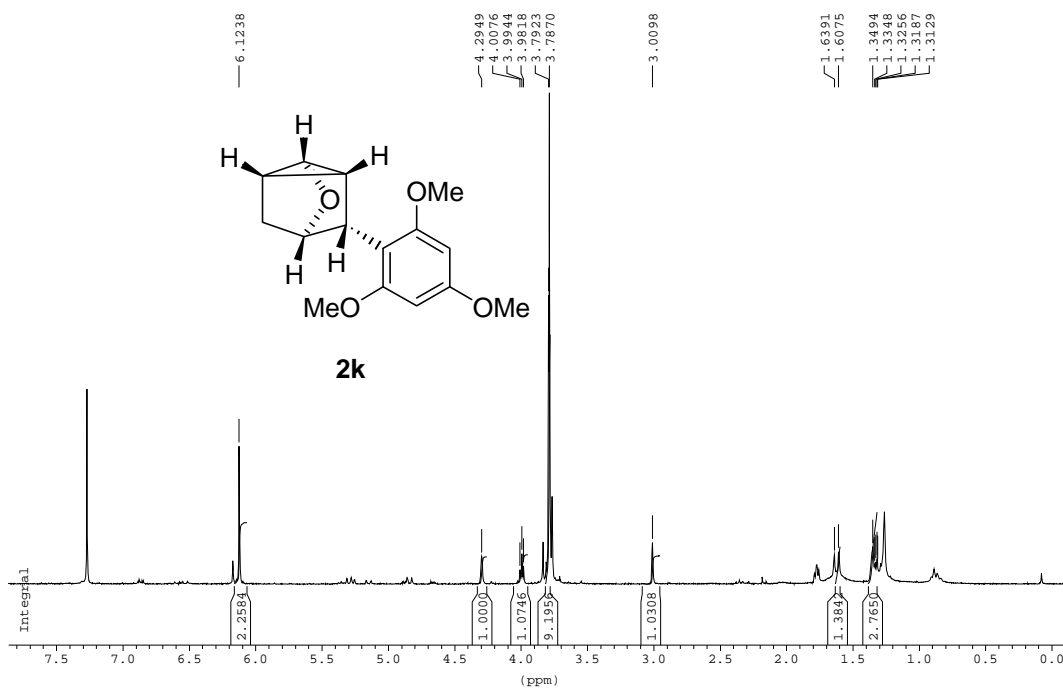

Q09SC1106A

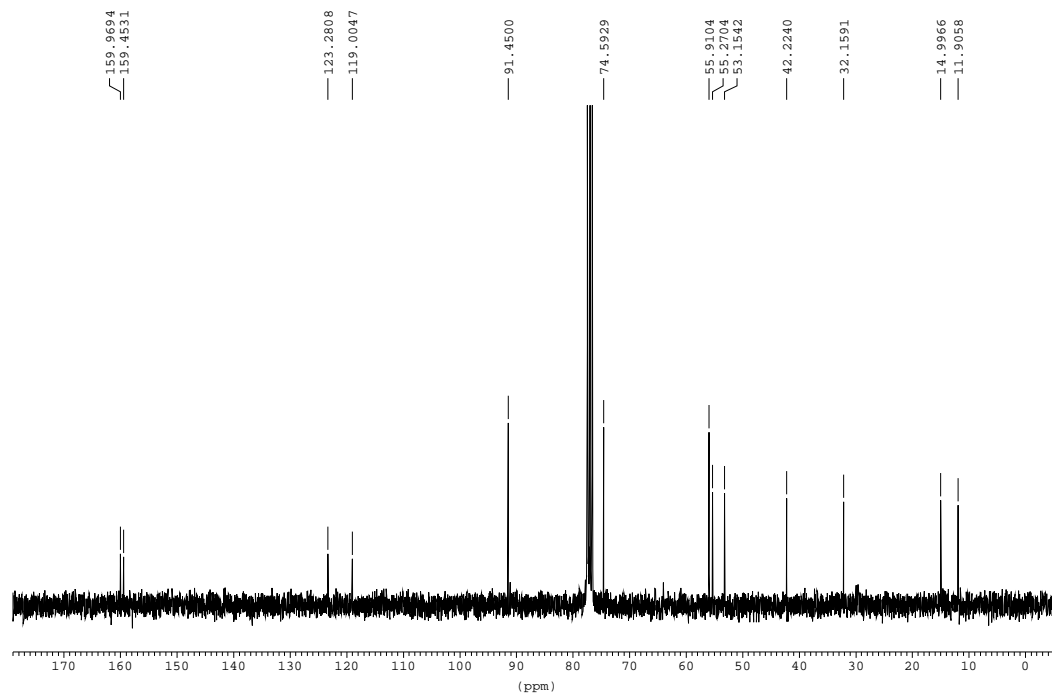

Q09SC1099A

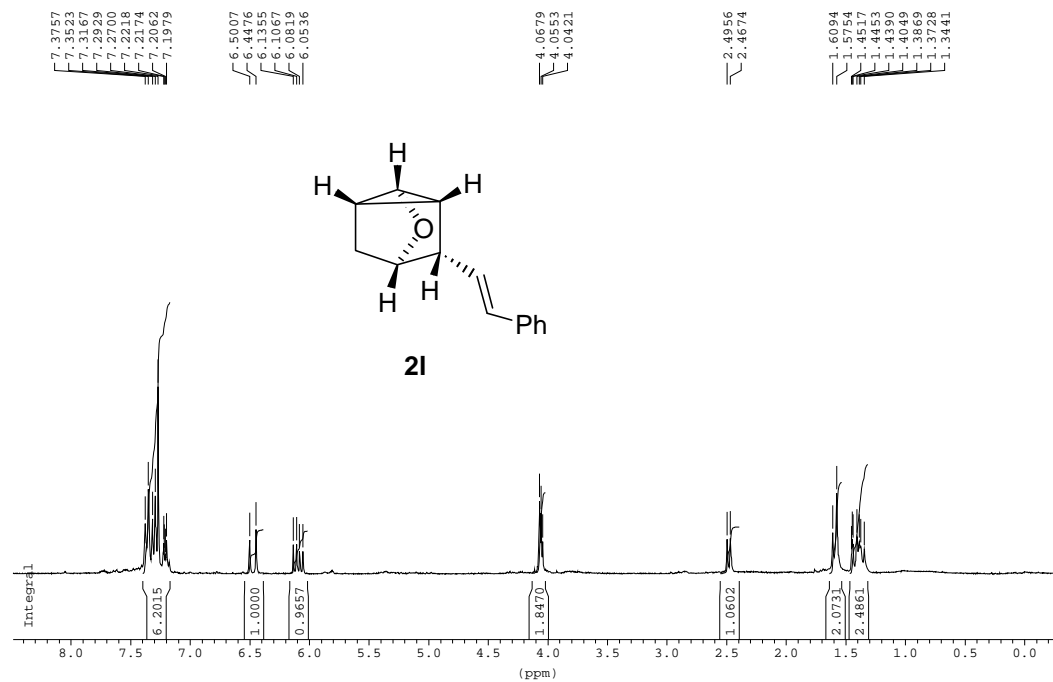

Q09SC1099A

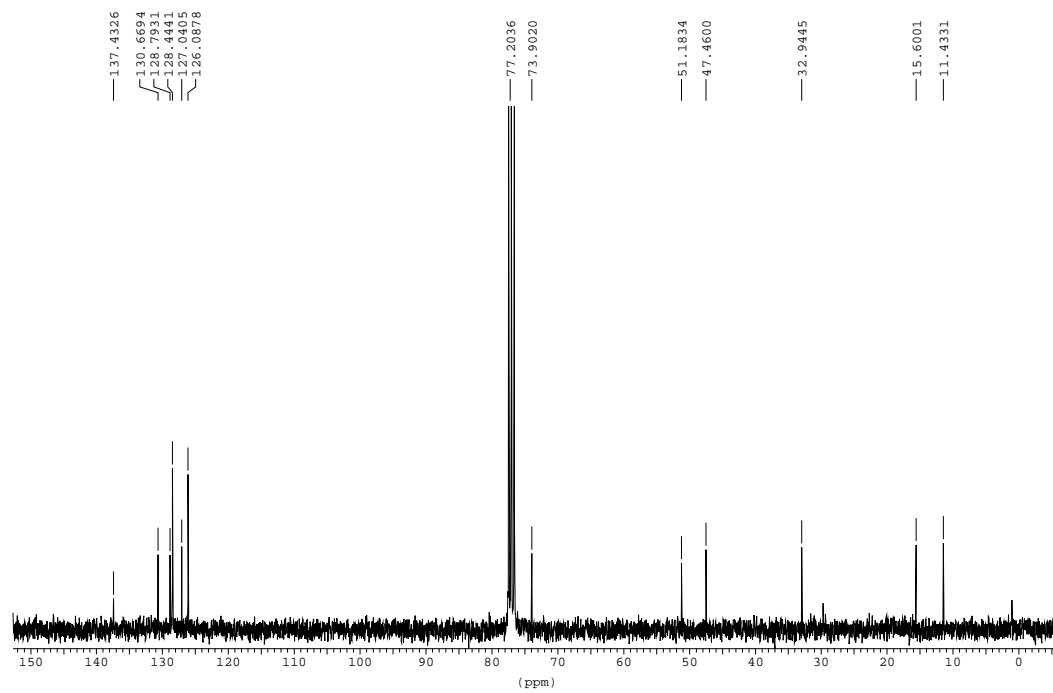

Q09SC1164A

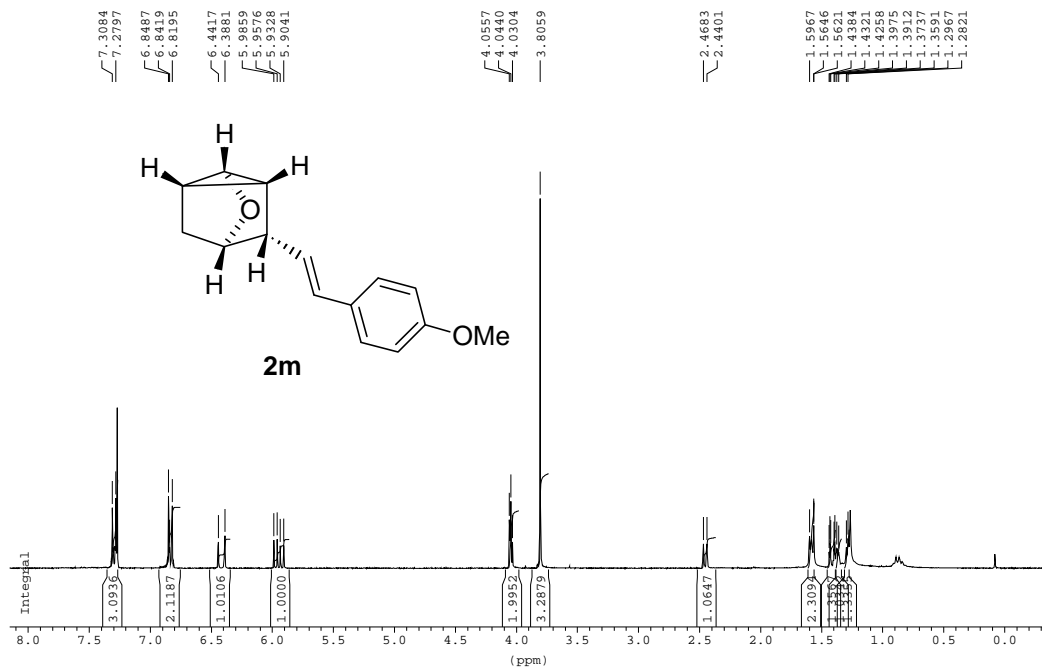

Q09SC1164A

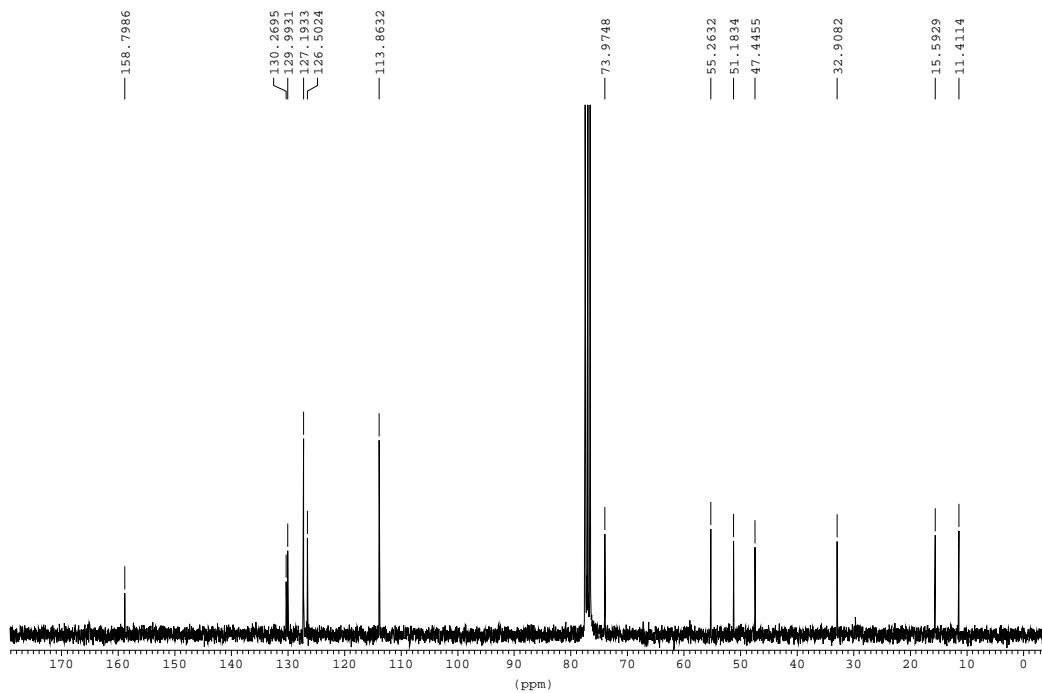

Q09SC1219P

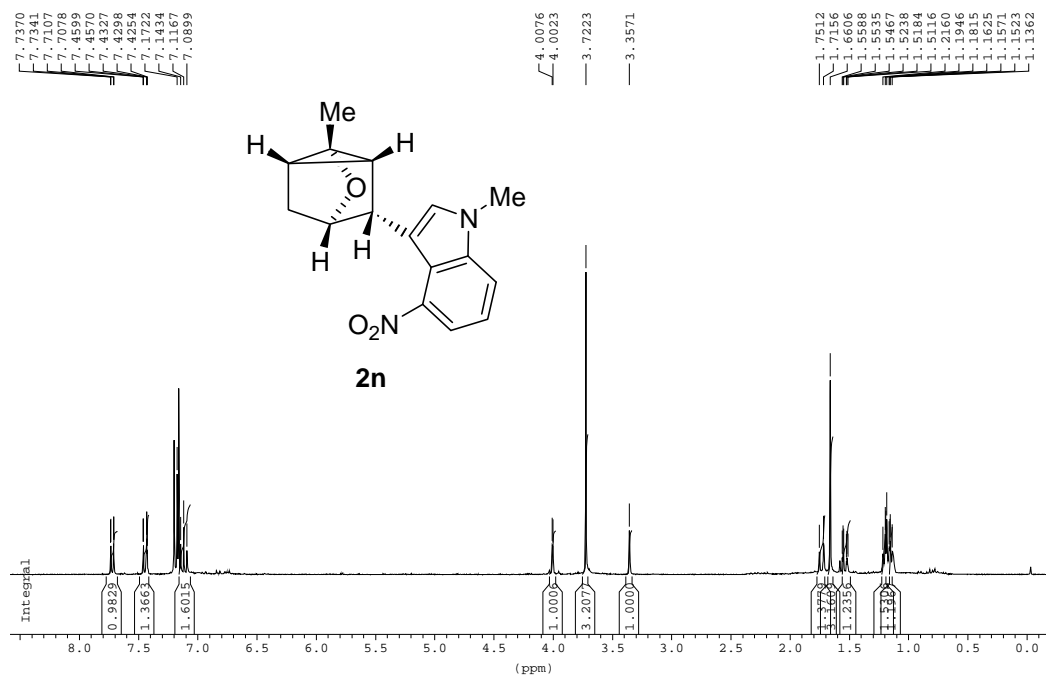

Q09SC1219BA

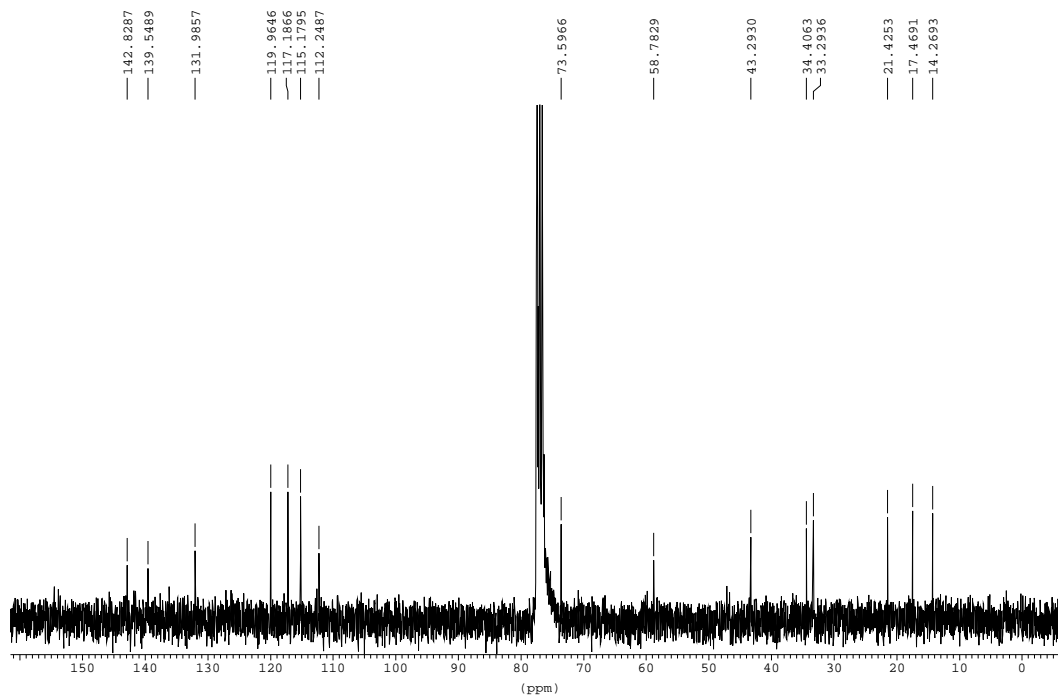

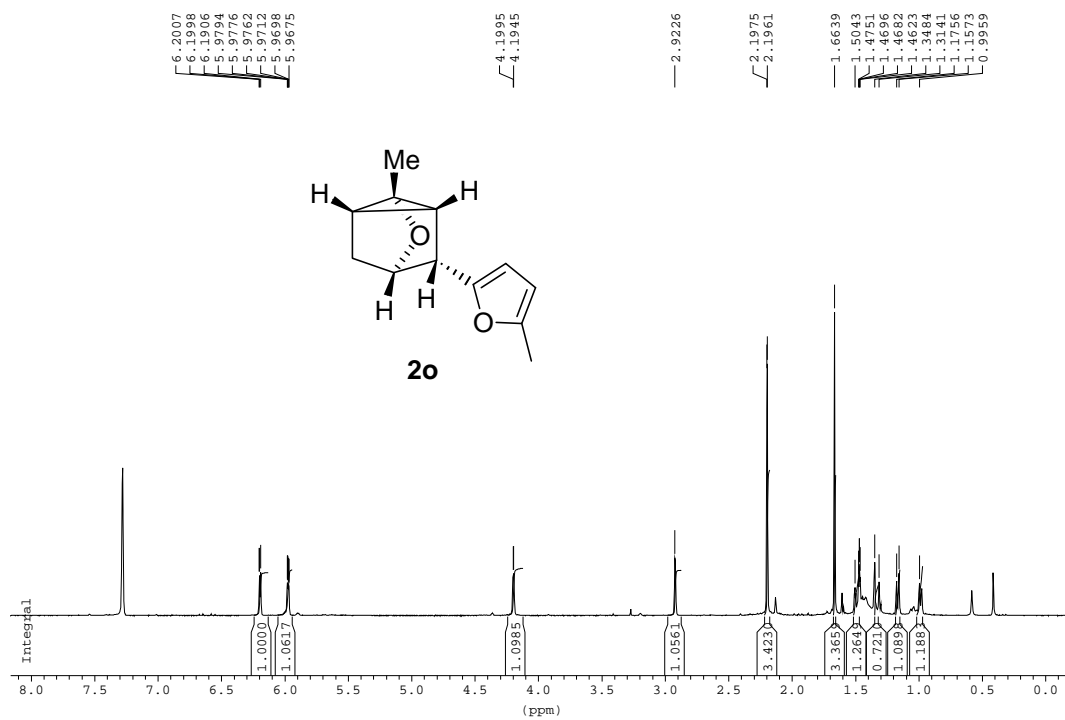

Q09SC950A

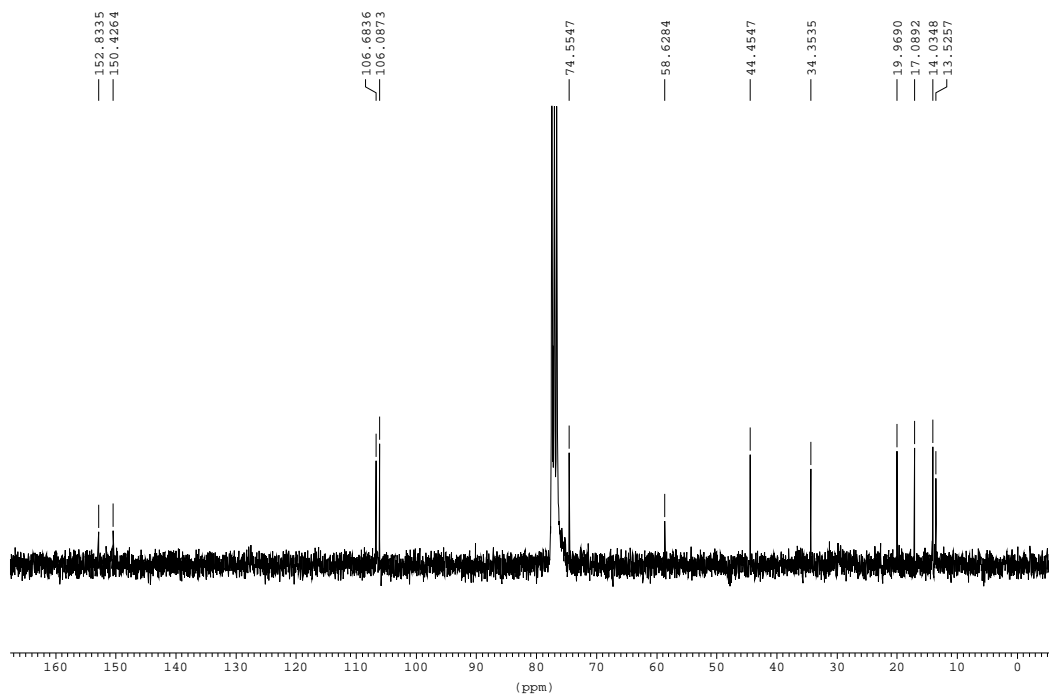



NOESY (2o):

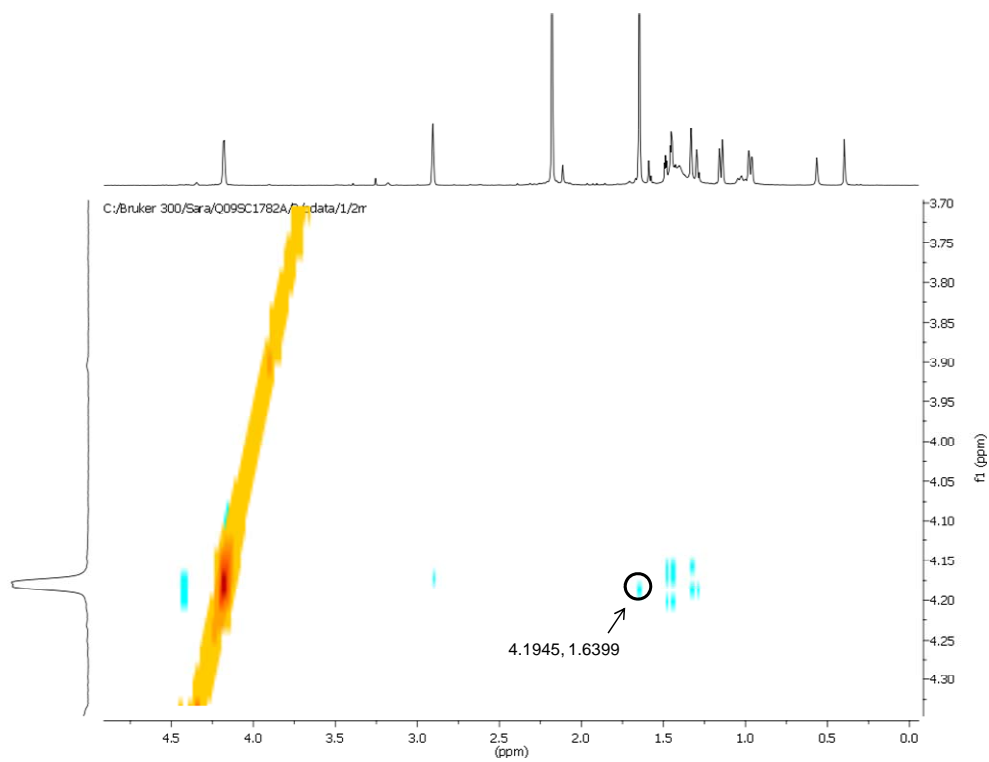

Q09SC1240P

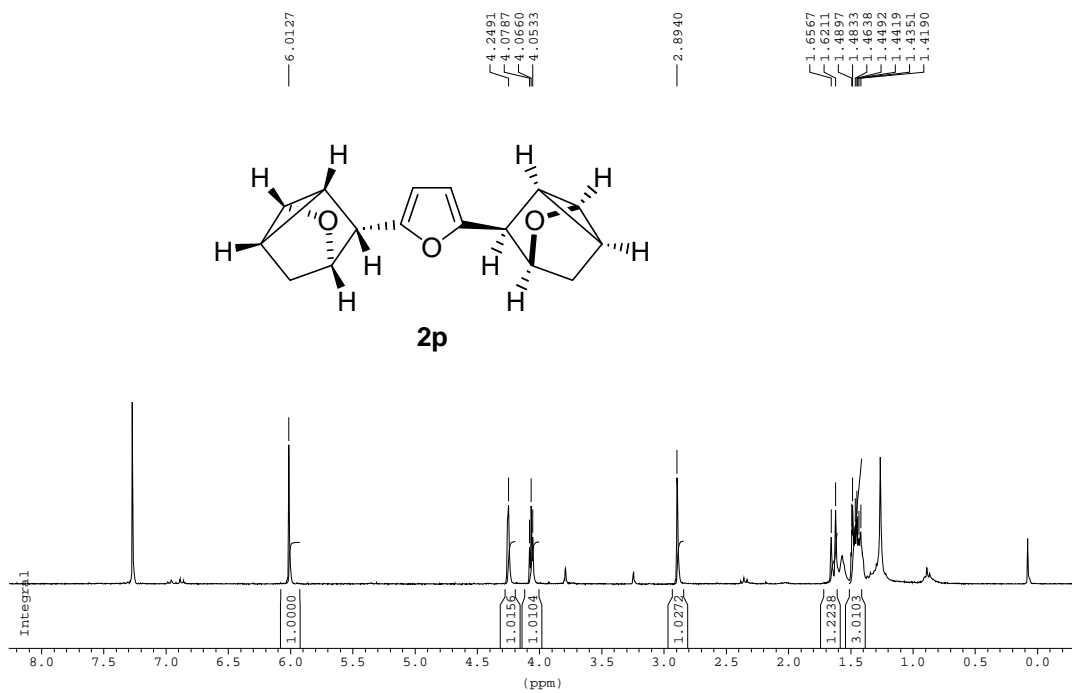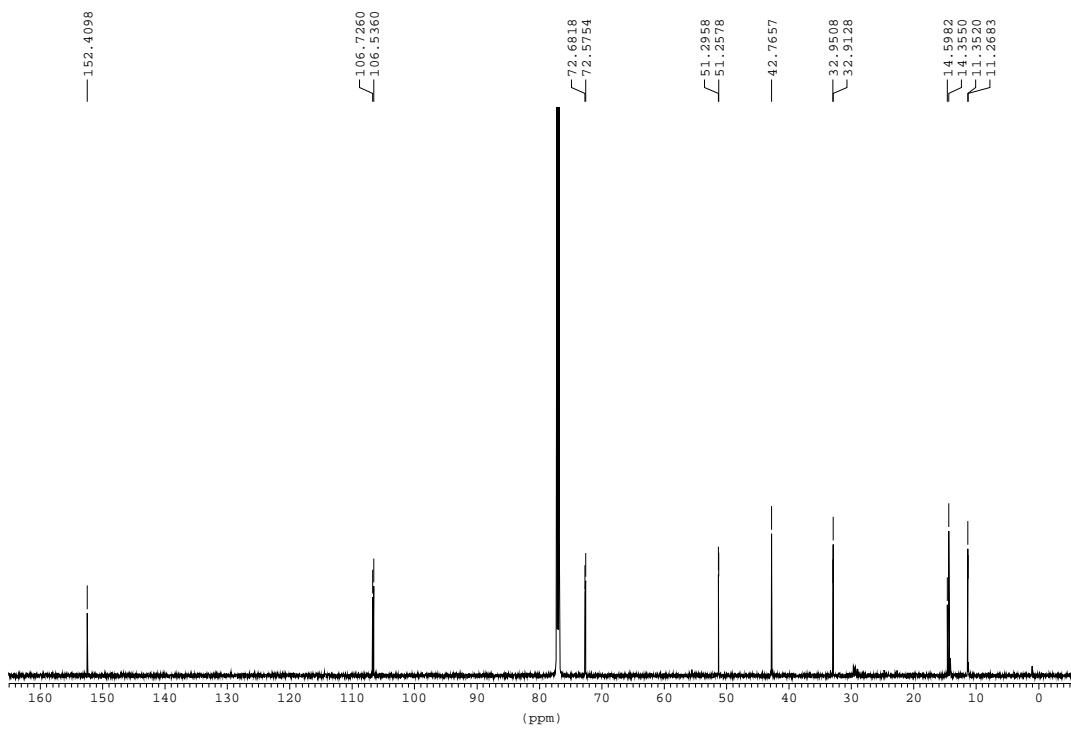

Supplement: c6cc03779h1.pdf [file c6cc03779h1.pdf]
